# Supplementary material for: Disruption of Aryl Hydrocarbon Receptor Homeostatic Levels during Embryonic Stem Cell Differentiation Alters Expression of Homeobox Transcription Factors that Control Cardiomyogenesis
Source: PubMed Central journal article supplement (PMC3855521; doi:10.1289/ehp.1307297), 2013-09-20
Supplement: ehp.1307297.s001.508.pdf [file ehp.1307297.s001.508.pdf]

**Supplemental Material**

**Disruption of Aryl Hydrocarbon Receptor Homeostatic Levels during Embryonic Stem Cell Differentiation Alters Expression of Homeobox Transcription Factors that Control Cardiomyogenesis**

Qin Wang, Jing Chen, Chia-I Ko, Yunxia Fan, Vinicius Carreira, Yinglei Chen, Ying Xia, Mario Medvedovic, and Alvaro Puga

Department of Environmental Health and Center for Environmental Genetics, University of Cincinnati College of Medicine, Cincinnati, Ohio, USA

## Table of Contents

|                                                                                                                                                                                             |    |
|---------------------------------------------------------------------------------------------------------------------------------------------------------------------------------------------|----|
| Supplemental Table S1. Primer sequences and product size for qPCR analysis of mRNA expression of the indicated genes. ....                                                                  | 3  |
| Supplemental Table S2. Cardiac Marker Genes Affected in Their Expression by TCDD Treatment of Differentiating Mouse ES Cells. ....                                                          | 4  |
| Supplemental Table S3. Z-Scores of Top 100 GO Terms AHR-Positive vs Unselected Cells. ....                                                                                                  | 7  |
| Supplemental Table S4: Z-Scores of Top 100 GO Terms AHR-Positive 48 h TCDD vs Control Cells. ....                                                                                           | 14 |
| Supplemental Table S5. Expression levels of transcription factors that show differential expression between TCDD-treated AHR-positive cells and controls (Log2Fold change).....             | 23 |
| Supplemental Table S6. Expression levels of transcription factors that regulate cardiomyocyte differentiation in TCDD-treated AHR-positive cells relative to controls (Log2 Fold change)... | 42 |
| Supplemental Table S7. Summary of PcG and TxG genes affected in their expression by TCDD treatment in AHR-positive cells.....                                                               | 45 |
| Supplemental Figure S1. Higher magnification of the GD7.5 embryos shown in Fig. 1A. ....                                                                                                    | 48 |
| Supplemental Figure S2. Stable integration of an <i>Ahr</i> ShRNA lentivirus inhibits AHR expression. ....                                                                                  | 49 |
| Supplemental Figure S3. Characterization of AHR-positive cardiomyocytes. ....                                                                                                               | 50 |
| Supplemental Figure S4. Time-dependent expression changes of PcG and TxG genes deregulated by the AHR/TCDD axis.....                                                                        | 52 |
| References.....                                                                                                                                                                             | 53 |

Supplemental Table S1. Primer sequences and product size for qPCR analysis of mRNA expression of the indicated genes.

| <b>Gene</b>           | <b>Forward primer sequence (5'→3')</b> | <b>Reverse primer sequence (5'→3')</b> | <b>PCR product size (bp)</b> |
|-----------------------|----------------------------------------|----------------------------------------|------------------------------|
| <i>Ahr</i>            | GGCCAAGAGCTTCTTTGATG                   | TGCCAGTCTCTGATTTGTGC                   | 93                           |
| <i>Cx40</i>           | AAGGCTCGGCCTCGGTCTCC                   | CCCAGGACCAGCATGCGGAA                   | 146                          |
|                       | CTGGCCACTGGGGAAGTGCC                   | TAGCCCTGAGGAAGGCGGTGG                  | 125                          |
| <i>Cyp11a1</i>        | GTGTCTGGTTACTTTGACAAGTGG               | AACATGGACATGCAAGGACA                   | 199                          |
| <i>Ecel1</i>          | CAACGGGGGACTCAAGGCGG                   | TGGTGAGACCCAGGGTGGGC                   | 92                           |
|                       | GAGACGGCGCTGGCCAACAT                   | TGGCAGGTGCCAAGGTCTGC                   | 106                          |
| <i>Gata4</i>          | TCTCACTATGGGCACAGCAG                   | GCGATGTCTGAGTGACAGGA                   | 136                          |
| <i>Gata6</i>          | TCGAAACGCCGGTGCTCCAC                   | GTTACGCACTCGCGGCTCT                    | 116                          |
|                       | CGGTGCGGGCCGTTCTTCTC                   | CACCAGCCGCCGTCAGTCAA                   | 97                           |
| <i>Hcn4</i>           | CCACCACTGGGTTGCGCCAC                   | GCAGCCTGTGGAGAGCGAGC                   | 109                          |
| <i>Kdr</i>            | GGCGGTGGTGACAGTATCTT                   | CTCGGTGATGTACACGATGC                   | 189                          |
| <i>Mef2c</i>          | ACGCCTGTACCTAACATC                     | TTTCCCTTTCCTTTCTTTCC                   | 150                          |
| <i>Mlc2v</i>          | CCCGAGGGCAAAGGGTCACT                   | GACGTCAGGGGAAAGGCTGC                   | 117                          |
|                       | TGGCAACTGGCCTCAGACACC                  | ACGTTGGAGCTCCCGCCTTCT                  | 71                           |
| <i>Myh6</i>           | CTGCTGGAGAGGTTATTCCTCG                 | GGAAGAGTGAGCGGGGCATCAAGG               | 302                          |
| <i>Myh7</i>           | TGCAAGGCTCCAGGTCTGAGGGC                | GCCAACACCAACCTGTCCAAGTTC               | 202                          |
| <i>Nanog</i>          | AGGGTCTGCTACTGAGATGCTCTG               | CAACCACTGGTTTTTCTG CCACCG              | 364                          |
| <i>Nkx2-5</i>         | CGACGGAAGCCACGCGTGCT                   | CCGCTGTCGCTTGCACTT                     | 180                          |
| <i>Nppa (Anf)</i>     | AGCCCAGAGTGGACTAGGCTGC                 | TGCGTGACACACCACAAGGGC                  | 123                          |
|                       | TCAGATCGTGCCCCGACCCA                   | GGCCTGGAAGCCAAAAGGCCA                  | 88                           |
| <i>Oct4</i>           | GGCGTTCTCTTTGAAAGGTGTTT                | CTCGAACCACATCCTTCTCT                   | 313                          |
| <i>Pgp9.5 (Uchl1)</i> | TGCAGGTGCCATCCGCGAAG                   | CCCTAGCACGTGCGCGAAGC                   | 119                          |
|                       | CCATGGCGCCAGCTCAGAGG                   | CCACGGCAGAGAAGCGGACC                   | 101                          |
| <i>Shox2</i>          | GGAGCTGGACATGGGA                       | GCCTCTGCTTGATTTTGGTC                   | 140                          |
| <i>Tbx3</i>           | CCCCGCTACGGGGGAGCAAT                   | TGGAACCGCGGCTGGTACTT                   | 129/189                      |
|                       | CAAAGAGCGTGGGAGCCGGG                   | CAAGCAGGGGCTCGACTGGC                   | 98                           |
| <i>Tbx5</i>           | TACCCCGCGCCCACTCTCAT                   | TGCGGTGCGGGTCCAACACT                   | 120                          |
|                       | CCTGTGGTCAGGCAGTGCGG                   | CTGGGCACGCCGTGAGTGTA                   | 92                           |

Supplemental Table S2. Cardiac Marker Genes Affected in Their Expression by TCDD Treatment of Differentiating Mouse ES Cells.

| Gene         | Description                                                                                                                                                                                                           | Function                                                                                                                                                                                                                                                                                                                             | Expression                                                                                                                      | Reference                                                     |
|--------------|-----------------------------------------------------------------------------------------------------------------------------------------------------------------------------------------------------------------------|--------------------------------------------------------------------------------------------------------------------------------------------------------------------------------------------------------------------------------------------------------------------------------------------------------------------------------------|---------------------------------------------------------------------------------------------------------------------------------|---------------------------------------------------------------|
| <i>Cx40</i>  | Connexin gene consists of 20 members in mouse. Four isoforms Cx 40, Cx43, Cx45, Cx37 are known as “cardiovascular connexins”, playing roles in cardiovascular morphology and function.                                | Major gap-junction protein in the atrial myocardium. Gap junctions are responsible for cell-cell conduction of the action potential.                                                                                                                                                                                                 | Expressed mainly in the atrial working myocardium, the conduction system and the vasculature.                                   | (Sohl and Willecke 2004; Chaldoupi et al. 2009)               |
| <i>Ece1</i>  | endothelin-1 converting enzyme-1, type II metalloprotease, Four isoforms Ece1a, Ece1b, Ece1c and Ece1d                                                                                                                | Cleave endothelin precursor big-endothelin-1, a 38-amino-acid peptide, to yield functional form of endothelin-1; endothelin-1 and ECE play a role in endocrine function as well as growth and development. ECE-1 is involved in the pathogenesis of disease states including cancer, cardiovascular disease and Alzheimer’s disease. | Exists as a dimer on the cell surface                                                                                           | (Kuruppu and Smith 2012)                                      |
| <i>Gata4</i> | Belong to Zinc finger super family, members of this family including GATA 1-6. Regulate cell-fate specification and differentiation, and control cell proliferation and movement.                                     | Essential for the hypertrophic response; induce the formation of cardiac myocytes in embryonic carcinoma cells.                                                                                                                                                                                                                      | GATA4/5/6 mainly expressed in endodermally derived tissues including heart, lung, stomach, intestine, ovary blood vessels, etc. | (Patient and McGhee 2002)                                     |
| <i>Gata6</i> | Refer to the above cell.                                                                                                                                                                                              | Synergistically with NFAT activated smooth-muscle-specific gene transcription to maintain differentiated Vascular smooth muscle cells.                                                                                                                                                                                               | Refer to the above cell.                                                                                                        | (Patient and McGhee 2002)                                     |
| <i>Hcn4</i>  | Hyperpolarization-activated cyclic nucleotide-gated channel; members includes HCN 1-4.                                                                                                                                | “Pacemaker channels”, help generate rhythmic activity within groups of heart and brain cells. In the embryo, cAMP-bound HCN4 is a powerful pacemaker. In adult mice, HCN4 ensures stable heart rhythm during and after stress, not pacemaking.                                                                                       | Prominently expressed in the pace maker region of the mammalian heart, also expressed in the brain.                             | (Stieber et al. 2003; Harzheim et al. 2008; Biel et al. 2009) |
| <i>Kdr</i>   | Kinase insert domain-containing receptor/fetal liver kinase-1 (Flk1), also called VEGFR2 (vascular endothelial growth factor receptor -2) CD309 (cluster of differentiation 309). A type III receptor tyrosine kinase | Required for the differentiation of endothelial progenitor cells (EPCs) and for the movement of EPCs from the posterior primitive streak to the yolk sac, a precondition for the subsequent formation of blood vessels; plays a critical roles in the development and formation of blood vessel networks.                            | EPCs, endothelial cells, primitive and more mature hematopoietic cells.                                                         | (Wang et al. 2007)                                            |
| <i>Mef2c</i> | Belongs to myocyte enhancer factor-2 family, also referred to as RSRF (Related to Serum Response Factor); members in this gene family include Mef2 a-d.                                                               | Pivotal role in morphogenesis and myogenesis of skeletal, cardiac and smooth muscle cells. Regulates cardiac hypertrophy and remodeling.                                                                                                                                                                                             | In all developing muscle cells, non-muscle cells including brain and lymphoid tissue.                                           | (Blackand Olson 1998; Pereira et al. 2009)                    |

| Gene          | Description                                                                                                                         | Function                                                                                                                                                                                                                                | Expression                                                                                                                                                                                                                                     | Reference                                     |
|---------------|-------------------------------------------------------------------------------------------------------------------------------------|-----------------------------------------------------------------------------------------------------------------------------------------------------------------------------------------------------------------------------------------|------------------------------------------------------------------------------------------------------------------------------------------------------------------------------------------------------------------------------------------------|-----------------------------------------------|
| <i>Mlc2v</i>  | Regulatory (phosphorylatable) myosin light chain , three members <i>Mlc2a</i> , <i>Mlc2v</i> and <i>Mlc2f</i> belong to this group. | Associated with the cardiac myosin beta heavy chain, Ca <sup>2+</sup> triggers the phosphorylation of regulatory light chain which in turn triggers contraction.                                                                        | Ventricular myocardium restricted.                                                                                                                                                                                                             | (Franco et al. 1998)                          |
| <i>Myh6/7</i> | Myosin heavy chain                                                                                                                  | A ubiquitous eukaryotic motor protein; interacts with actin to generate the force for cellular movements ranging from cytokinesis to muscle contraction.                                                                                | Myh6 is expressed in the adult ventricles and atria, exclusively restricted to the heart. Myh7 is expressed in both cardiac and slow (type I) skeletal muscle fibers; the abundant isoform in the ventricles of all mammals during fetal life. | (Weiss and Leinwand 1996)                     |
| <i>Nkx2-5</i> | Nkx2 homeobox 5, family members including Nkx2-3, Nkx2-5, Nkx2-6 and Nkx2-7                                                         | Early role in cardiomyocyte specification and differentiation and late role in cardiac morphogenesis.                                                                                                                                   | First detected in mesodermal cells specified to form heart at ED 7.5 in mouse and the expression is maintained throughout the developing and adult heart. Transiently expressed in the developing pharynx, thyroid and stomach.                | (Harvey 1996; Lien et al. 1999)               |
| <i>Nppa</i>   | Atrial natriuretic peptide (ANF)                                                                                                    | An inhibitor of renal tubular reabsorption of NaCl produced and excreted by the heart. ANF promoter is a transcriptional target for both GATA-4 and NKX2-5; Induction of <i>Nppa</i> is a conserved feature of ventricular hypertrophy. | Expression of <i>Nppa</i> is an early and specific marker for the differentiating working myocardium of the atria and ventricles of the developing heart.                                                                                      | (Durocher et al. 1997; Houweling et al. 2005) |
| <i>Pgp9.5</i> | Protein gene product 9.5                                                                                                            | A specific tissue marker for the neuroendocrine system; corresponds with abnormal ventricular automaticity.                                                                                                                             | Cytoplasm of neuronal cells; morphologically dynamic myocardial regions during heart ontogenesis; expressed in myocardial sleeves, cardiac nerves and components of the cardiac conduction systems.                                            | (El Sharaby et al. 2001; Otsuki et al. 2004)  |
| <i>Shox2</i>  | Short stature homeobox 2                                                                                                            | Pacemaking function; an essential transcription factor for the differentiation of cardiac pacemaker cells through repressing NKX2-5.                                                                                                    | Restricted to the sinus venosus region and eventually to SAN, including the pacemaker and sinus valves in the developing heart.                                                                                                                | (Espinoza-Lewis et al. 2009)                  |

| <b>Gene</b> | <b>Description</b>                                                                                                           | <b>Function</b>                                                 | <b>Expression</b>                                                                                                                                                                                                                                          | <b>Reference</b>       |
|-------------|------------------------------------------------------------------------------------------------------------------------------|-----------------------------------------------------------------|------------------------------------------------------------------------------------------------------------------------------------------------------------------------------------------------------------------------------------------------------------|------------------------|
| <i>Tbx3</i> | Belongs to T-box gene family encoding more than 20 transcription factors, which share a highly conserved DNA-binding region. | Inhibition of chamber myocardium, conduction system patterning. | Non-chamber myocardium of the atrioventricular canal (AVC) during cardiac development; epithelial and neural crest cells in the pharyngeal region, in the sinoatrial node (SAN) primordium, and in all mature components of the central conduction system. | (Greulich et al. 2011) |
| <i>Tbx5</i> | Refer to the above cell.                                                                                                     | Chamber formation, septation and cardiomyocyte differentiation. | First expressed in bilateral wings of the cardiogenic mesoderm and later in the endocardium and myocardium of the inflow region, the atria, the AVC and the left ventricle.                                                                                | (Greulich et al. 2011) |

Supplemental Table S3. Z-Scores of Top 100 GO Terms AHR-Positive vs Unselected Cells.

| Cluster | GO Term    | Name                                                                  | Day 5 | Day 8 | Day 11 | Day 14 |
|---------|------------|-----------------------------------------------------------------------|-------|-------|--------|--------|
| A       | GO:0061311 | cell surface receptor signaling pathway involved in heart development | -9.89 | -3.06 | -16.16 | -10.56 |
| A       | GO:0005615 | extracellular space                                                   | -7.71 | -3.21 | -9.62  | -10.57 |
| A       | GO:0009887 | organ morphogenesis                                                   | -5.17 | -2.73 | -8.57  | -9.78  |
| A       | GO:0001501 | skeletal system development                                           | -4.42 | -2.70 | -8.07  | -9.56  |
| A       | GO:0001944 | vasculature development                                               | -4.74 | -3.08 | -8.23  | -10.95 |
| A       | GO:0001568 | blood vessel development                                              | -4.68 | -3.12 | -8.40  | -10.89 |
| A       | GO:0072358 | cardiovascular system development                                     | -5.11 | -3.26 | -9.45  | -12.58 |
| A       | GO:0072359 | circulatory system development                                        | -5.11 | -3.26 | -9.45  | -12.58 |
| A       | GO:0007507 | heart development                                                     | -4.54 | -3.39 | -11.19 | -11.08 |
| A       | GO:0048738 | cardiac muscle tissue development                                     | -4.00 | -3.07 | -10.26 | -11.32 |
| A       | GO:0061371 | determination of heart left/right asymmetry                           | -6.68 | -2.47 | -10.31 | -7.03  |
| A       | GO:0001947 | heart looping                                                         | -6.62 | -2.54 | -10.60 | -7.28  |
| A       | GO:0003143 | embryonic heart tube morphogenesis                                    | -6.27 | -2.40 | -10.08 | -6.93  |
| A       | GO:0003209 | cardiac atrium morphogenesis                                          | -5.60 | -2.22 | -12.36 | -9.40  |
| A       | GO:0003230 | cardiac atrium development                                            | -5.49 | -2.16 | -12.09 | -9.44  |
| A       | GO:0035051 | cardiac cell differentiation                                          | -5.40 | -2.55 | -11.66 | -9.20  |
| A       | GO:0003151 | outflow tract morphogenesis                                           | -5.23 | -2.20 | -10.85 | -9.04  |
| A       | GO:0060976 | coronary vasculature development                                      | -4.02 | -3.18 | -12.00 | -9.16  |
| A       | GO:0048762 | mesenchymal cell differentiation                                      | -3.96 | -2.20 | -11.26 | -9.28  |
| A       | GO:0060485 | mesenchyme development                                                | -3.83 | -2.38 | -11.22 | -9.46  |
| A       | GO:0014031 | mesenchymal cell development                                          | -3.63 | -2.20 | -11.06 | -8.51  |
| A       | GO:0048644 | muscle organ morphogenesis                                            | -2.71 | -2.89 | -11.60 | -10.28 |
| A       | GO:0048483 | autonomic nervous system development                                  | -2.52 | -2.17 | -11.12 | -9.32  |
| A       | GO:2000826 | regulation of heart morphogenesis                                     | -4.23 | -2.36 | -14.18 | -8.94  |
| A       | GO:0005110 | frizzled-2 binding                                                    | -3.76 | -2.15 | -14.26 | -6.93  |
| A       | GO:0005518 | collagen binding                                                      | -3.75 | -0.73 | -12.38 | -5.34  |
| A       | GO:0033613 | activating transcription factor binding                               | -3.24 | -3.13 | -9.92  | -6.86  |
| A       | GO:0060317 | cardiac epithelial to mesenchymal transition                          | -2.39 | -1.97 | -10.33 | -6.13  |
| A       | GO:0048538 | thymus development                                                    | -1.78 | -1.65 | -10.24 | -6.07  |
| A       | GO:0060043 | regulation of cardiac muscle cell proliferation                       | -1.80 | -2.19 | -9.91  | -7.38  |
| A       | GO:0045668 | negative regulation of osteoblast differentiation                     | -1.08 | -2.10 | -10.48 | -7.18  |
| A       | GO:0060716 | labyrinthine layer blood vessel development                           | -0.75 | -2.05 | -10.06 | -5.26  |
| A       | GO:0060840 | artery development                                                    | -2.53 | -2.44 | -10.22 | -7.96  |
| A       | GO:0048844 | artery morphogenesis                                                  | -2.52 | -2.37 | -10.67 | -8.32  |
| A       | GO:0060045 | positive regulation of cardiac muscle cell proliferation              | -2.04 | -1.95 | -11.46 | -8.22  |

| Cluster | GO Term    | Name                                                                                | Day 5 | Day 8 | Day 11 | Day 14 |
|---------|------------|-------------------------------------------------------------------------------------|-------|-------|--------|--------|
| A       | GO:0043392 | negative regulation of DNA binding                                                  | -1.72 | -1.70 | -11.07 | -7.68  |
| A       | GO:0043388 | positive regulation of DNA binding                                                  | -0.93 | -1.71 | -10.90 | -8.50  |
| A       | GO:0033275 | actin-myosin filament sliding                                                       | -0.76 | -1.55 | -10.05 | -8.57  |
| A       | GO:0001755 | neural crest cell migration                                                         | -1.13 | 1.94  | -10.66 | -7.46  |
| A       | GO:0003156 | regulation of organ formation                                                       | -5.90 | -2.94 | -16.70 | -10.11 |
| A       | GO:0048645 | organ formation                                                                     | -5.56 | -3.03 | -15.35 | -9.70  |
| A       | GO:0060914 | heart formation                                                                     | -4.13 | -2.70 | -17.43 | -11.62 |
| A       | GO:0003206 | cardiac chamber morphogenesis                                                       | -4.34 | -3.40 | -15.44 | -13.47 |
| A       | GO:0003205 | cardiac chamber development                                                         | -4.32 | -3.36 | -15.04 | -13.29 |
| A       | GO:0048485 | sympathetic nervous system development                                              | -3.43 | -3.09 | -15.12 | -12.83 |
| A       | GO:0003007 | heart morphogenesis                                                                 | -4.74 | -3.26 | -13.23 | -11.08 |
| A       | GO:0003208 | cardiac ventricle morphogenesis                                                     | -2.58 | -2.77 | -13.63 | -12.85 |
| A       | GO:0003231 | cardiac ventricle development                                                       | -3.18 | -2.53 | -11.80 | -11.99 |
| A       | GO:0055008 | cardiac muscle tissue morphogenesis                                                 | -2.07 | -3.24 | -13.12 | -11.78 |
| A       | GO:0060415 | muscle tissue morphogenesis                                                         | -1.95 | -3.05 | -12.41 | -11.12 |
| A       | GO:0060039 | pericardium development                                                             | -2.51 | -2.49 | -14.53 | -11.17 |
| A       | GO:0010463 | mesenchymal cell proliferation                                                      | -3.00 | -2.72 | -15.63 | -10.81 |
| A       | GO:2000677 | regulation of transcription regulatory region DNA binding                           | -2.00 | -2.47 | -15.93 | -10.76 |
| A       | GO:0060977 | coronary vasculature morphogenesis                                                  | -1.55 | -3.34 | -13.86 | -10.03 |
| A       | GO:0003215 | cardiac right ventricle morphogenesis                                               | -2.11 | -3.77 | -17.54 | -12.81 |
| A       | GO:0042415 | norepinephrine metabolic process                                                    | -1.12 | -2.62 | -18.24 | -11.56 |
| A       | GO:0010658 | striated muscle cell apoptosis                                                      | -0.64 | -2.35 | -15.71 | -13.67 |
| A       | GO:0010659 | cardiac muscle cell apoptosis                                                       | -0.64 | -2.35 | -15.71 | -13.67 |
| A       | GO:0010656 | negative regulation of muscle cell apoptosis                                        | -0.61 | -2.41 | -16.00 | -15.26 |
| A       | GO:0061046 | regulation of branching involved in lung morphogenesis                              | -1.68 | -2.44 | -16.73 | -8.35  |
| A       | GO:0060431 | primary lung bud formation                                                          | -1.55 | -2.40 | -16.68 | -8.09  |
| A       | GO:0060501 | positive regulation of epithelial cell proliferation involved in lung morphogenesis | -0.76 | -2.43 | -16.83 | -8.87  |
| A       | GO:0060502 | epithelial cell proliferation involved in lung morphogenesis                        | -0.91 | -2.06 | -14.19 | -7.56  |
| A       | GO:2000794 | regulation of epithelial cell proliferation involved in lung morphogenesis          | -0.66 | -2.19 | -15.34 | -8.08  |
| A       | GO:0043586 | tongue development                                                                  | -1.07 | -2.41 | -14.87 | -9.62  |
| A       | GO:0001967 | suckling behavior                                                                   | -0.82 | -2.27 | -15.95 | -10.17 |
| A       | GO:0009713 | catechol-containing compound biosynthetic process                                   | 0.81  | -2.16 | -14.88 | -9.67  |
| A       | GO:0034312 | diol biosynthetic process                                                           | 0.81  | -2.16 | -14.88 | -9.67  |
| A       | GO:0042423 | catecholamine biosynthetic process                                                  | 0.81  | -2.16 | -14.88 | -9.67  |
| A       | GO:0010660 | regulation of muscle cell apoptosis                                                 | -0.35 | -1.82 | -12.50 | -12.06 |
| A       | GO:0010657 | muscle cell apoptosis                                                               | -0.27 | -1.61 | -11.32 | -10.84 |



| Cluster | GO Term    | Name                                                                    | Day 5 | Day 8 | Day 11 | Day 14 |
|---------|------------|-------------------------------------------------------------------------|-------|-------|--------|--------|
| A       | GO:0070888 | E-box binding                                                           | 0.98  | -1.66 | -12.77 | -9.50  |
| A       | GO:0022610 | biological adhesion                                                     | -3.77 | -6.67 | -5.14  | -9.41  |
| A       | GO:0007155 | cell adhesion                                                           | -3.62 | -6.70 | -5.17  | -9.42  |
| A       | GO:0019838 | growth factor binding                                                   | -2.54 | -2.86 | -5.75  | -10.67 |
| A       | GO:0005201 | extracellular matrix structural constituent                             | -2.14 | -3.24 | -5.98  | -10.57 |
| A       | GO:0071230 | cellular response to amino acid stimulus                                | -1.59 | -3.90 | -6.08  | -12.97 |
| A       | GO:0071229 | cellular response to acid                                               | -1.73 | -3.56 | -5.50  | -11.74 |
| A       | GO:0043200 | response to amino acid stimulus                                         | -1.34 | -3.49 | -5.46  | -11.58 |
| A       | GO:0071417 | cellular response to organic nitrogen                                   | -1.14 | -3.52 | -5.53  | -11.68 |
| A       | GO:0071418 | cellular response to amine stimulus                                     | -1.22 | -3.58 | -5.61  | -11.89 |
| A       | GO:0014075 | response to amine stimulus                                              | -0.69 | -2.68 | -4.35  | -9.78  |
| A       | GO:0070206 | protein trimerization                                                   | -1.87 | -1.56 | -2.37  | -9.83  |
| A       | GO:0048012 | hepatocyte growth factor receptor signaling pathway                     | -1.49 | -1.45 | -2.67  | -9.97  |
| A       | GO:0051450 | myoblast proliferation                                                  | -0.15 | -0.37 | -2.05  | -10.97 |
| A       | GO:0003810 | protein-glutamine gamma-glutamyltransferase activity                    | -1.09 | -0.12 | -0.10  | -9.42  |
| A       | GO:0030199 | collagen fibril organization                                            | -0.68 | -3.36 | -6.16  | -16.12 |
| A       | GO:0070208 | protein heterotrimerization                                             | -0.13 | -1.94 | -4.02  | -16.05 |
| A       | GO:0048407 | platelet-derived growth factor binding                                  | -2.78 | -6.01 | -8.67  | -16.53 |
| A       | GO:0044420 | extracellular matrix part                                               | -2.20 | -3.81 | -11.88 | -17.14 |
| A       | GO:0005578 | proteinaceous extracellular matrix                                      | -3.53 | -9.93 | -15.05 | -20.78 |
| A       | GO:0031012 | extracellular matrix                                                    | -3.47 | -9.79 | -14.34 | -20.24 |
| A       | GO:0005581 | collagen                                                                | -1.56 | -3.08 | -15.86 | -22.25 |
| A       | GO:0060973 | cell migration involved in heart development                            | -6.02 | -4.27 | -24.85 | -18.01 |
| A       | GO:0061323 | cell proliferation involved in heart morphogenesis                      | -1.99 | -3.50 | -23.91 | -16.06 |
| A       | GO:2000679 | positive regulation of transcription regulatory region DNA binding      | -1.97 | -3.73 | -24.32 | -16.05 |
| A       | GO:0061307 | cardiac neural crest cell differentiation involved in heart development | -1.77 | -3.46 | -24.20 | -16.53 |
| A       | GO:0061308 | cardiac neural crest cell development involved in heart development     | -1.97 | -3.81 | -26.55 | -18.17 |
| A       | GO:0003680 | AT DNA binding                                                          | -1.78 | -3.76 | -25.51 | -17.23 |
| A       | GO:0042421 | norepinephrine biosynthetic process                                     | -1.72 | -3.82 | -25.97 | -16.69 |
| A       | GO:0005583 | fibrillar collagen                                                      | -1.31 | -6.15 | -28.49 | -18.32 |
| A       | GO:0071526 | semaphorin-plexin signaling pathway                                     | -4.62 | -3.49 | -17.65 | -15.07 |
| A       | GO:0003211 | cardiac ventricle formation                                             | -4.17 | -3.74 | -20.23 | -14.68 |
| A       | GO:0003207 | cardiac chamber formation                                               | -4.03 | -3.69 | -19.49 | -14.52 |
| A       | GO:0060536 | cartilage morphogenesis                                                 | -2.17 | -3.64 | -20.14 | -14.63 |
| A       | GO:0048934 | peripheral nervous system neuron differentiation                        | -2.11 | -3.31 | -20.94 | -13.99 |
| A       | GO:0048935 | peripheral nervous system neuron development                            | -2.11 | -3.31 | -20.94 | -13.99 |

| Cluster | GO Term    | Name                                                                       | Day 5  | Day 8  | Day 11 | Day 14 |
|---------|------------|----------------------------------------------------------------------------|--------|--------|--------|--------|
| A       | GO:0003263 | cardioblast proliferation                                                  | -1.76  | -3.20  | -20.90 | -13.16 |
| A       | GO:0003264 | regulation of cardioblast proliferation                                    | -1.76  | -3.20  | -20.90 | -13.16 |
| A       | GO:0003266 | regulation of secondary heart field cardioblast proliferation              | -1.76  | -3.20  | -20.90 | -13.16 |
| A       | GO:0003228 | atrial cardiac muscle tissue development                                   | -1.48  | -2.91  | -21.93 | -15.27 |
| A       | GO:0055009 | atrial cardiac muscle tissue morphogenesis                                 | -1.48  | -2.91  | -21.93 | -15.27 |
| A       | GO:0061032 | visceral serous pericardium development                                    | -1.14  | -3.23  | -21.18 | -15.76 |
| A       | GO:0010667 | negative regulation of cardiac muscle cell apoptosis                       | -0.97  | -3.13  | -20.43 | -17.84 |
| A       | GO:0007512 | adult heart development                                                    | -0.93  | -2.54  | -19.51 | -16.27 |
| A       | GO:0010664 | negative regulation of striated muscle cell apoptosis                      | -0.90  | -2.95  | -19.35 | -16.86 |
| A       | GO:0010662 | regulation of striated muscle cell apoptosis                               | -0.83  | -2.80  | -18.42 | -16.15 |
| A       | GO:0010665 | regulation of cardiac muscle cell apoptosis                                | -0.83  | -2.80  | -18.42 | -16.15 |
| A       | GO:0030198 | extracellular matrix organization                                          | -2.80  | -13.06 | -7.68  | -11.41 |
| A       | GO:0043062 | extracellular structure organization                                       | -2.80  | -13.06 | -7.68  | -11.41 |
| A       | GO:0008593 | regulation of Notch signaling pathway                                      | -2.46  | -20.13 | -4.21  | -2.42  |
| A       | GO:0007219 | Notch signaling pathway                                                    | -1.59  | -11.90 | -2.55  | -1.80  |
| B       | GO:0051151 | negative regulation of smooth muscle cell differentiation                  | -16.90 | -2.06  | -3.61  | -2.11  |
| B       | GO:0060395 | SMAD protein signal transduction                                           | -12.70 | -3.35  | -0.80  | 1.34   |
| B       | GO:0010470 | regulation of gastrulation                                                 | -11.91 | -2.99  | -0.52  | -0.09  |
| B       | GO:0051150 | regulation of smooth muscle cell differentiation                           | -11.68 | -1.73  | -4.13  | -2.63  |
| B       | GO:0045995 | regulation of embryonic development                                        | -9.05  | -2.63  | -4.88  | -2.49  |
| B       | GO:0051145 | smooth muscle cell differentiation                                         | -9.43  | -1.52  | -3.66  | -3.93  |
| B       | GO:0051148 | negative regulation of muscle cell differentiation                         | -9.00  | -1.22  | -2.60  | -2.34  |
| B       | GO:0042661 | regulation of mesodermal cell fate specification                           | -9.55  | -0.47  | -0.30  | -0.37  |
| B       | GO:0050710 | negative regulation of cytokine secretion                                  | -8.43  | -0.68  | 0.49   | 0.32   |
| B       | GO:0001542 | ovulation from ovarian follicle                                            | -8.49  | -0.31  | -0.32  | -0.23  |
| B       | GO:2000380 | regulation of mesoderm development                                         | -7.97  | -0.36  | -0.24  | -0.17  |
| B       | GO:0018022 | peptidyl-lysine methylation                                                | -8.20  | -0.65  | -1.46  | -0.60  |
| B       | GO:0018024 | histone-lysine N-methyltransferase activity                                | -7.88  | -0.61  | -1.38  | -0.53  |
| B       | GO:0016278 | lysine N-methyltransferase activity                                        | -7.57  | -0.62  | -1.30  | -0.47  |
| B       | GO:0016279 | protein-lysine N-methyltransferase activity                                | -7.57  | -0.62  | -1.30  | -0.47  |
| B       | GO:0001711 | endodermal cell fate commitment                                            | -10.45 | 2.50   | 6.35   | 5.51   |
| B       | GO:0035987 | endodermal cell differentiation                                            | -10.31 | 2.32   | 6.00   | 5.21   |
| B       | GO:0003306 | Wnt receptor signaling pathway involved in heart development               | -9.51  | 2.19   | 6.33   | 4.75   |
| B       | GO:0001714 | endodermal cell fate specification                                         | -9.93  | 2.92   | 7.19   | 6.25   |
| B       | GO:0003307 | regulation of Wnt receptor signaling pathway involved in heart development | -9.51  | 2.88   | 8.03   | 6.06   |
| B       | GO:2000043 | regulation of cardiac cell fate specification                              | -8.83  | 2.67   | 7.42   | 5.59   |

| Cluster | GO Term    | Name                                                                       | Day 5  | Day 8 | Day 11 | Day 14 |
|---------|------------|----------------------------------------------------------------------------|--------|-------|--------|--------|
| B       | GO:0001706 | endoderm formation                                                         | -12.35 | 1.36  | 4.09   | 3.59   |
| B       | GO:0007369 | gastrulation                                                               | -8.74  | 2.57  | 3.13   | 3.46   |
| B       | GO:0007492 | endoderm development                                                       | -8.70  | 2.41  | 3.02   | 3.27   |
| B       | GO:0001704 | formation of primary germ layer                                            | -8.02  | 1.74  | 2.40   | 3.08   |
| B       | GO:0060911 | cardiac cell fate commitment                                               | -7.47  | 1.93  | 5.56   | 4.18   |
| B       | GO:0042074 | cell migration involved in gastrulation                                    | -8.51  | 7.32  | 4.69   | 5.56   |
| B       | GO:0001710 | mesodermal cell fate commitment                                            | -5.64  | 4.74  | 5.66   | 5.60   |
| B       | GO:0007398 | ectoderm development                                                       | -4.17  | 4.91  | 5.48   | 4.80   |
| B       | GO:0009948 | anterior/posterior axis specification                                      | -4.02  | 4.84  | 3.40   | 3.32   |
| C       | GO:0008584 | male gonad development                                                     | -1.78  | 4.67  | 3.10   | 7.32   |
| C       | GO:0005160 | transforming growth factor beta receptor binding                           | -1.67  | 5.70  | 12.86  | 15.20  |
| C       | GO:0033327 | Leydig cell differentiation                                                | -1.87  | 6.73  | 7.77   | 18.40  |
| C       | GO:0030238 | male sex determination                                                     | 1.26   | 5.84  | 6.56   | 15.79  |
| C       | GO:0060008 | Sertoli cell differentiation                                               | 2.16   | 6.96  | 7.50   | 17.73  |
| C       | GO:0001825 | blastocyst formation                                                       | -3.71  | 9.05  | 10.30  | 7.81   |
| C       | GO:0001824 | blastocyst development                                                     | -2.05  | 6.96  | 7.67   | 5.92   |
| C       | GO:0001829 | trophectodermal cell differentiation                                       | -0.88  | 6.20  | 9.72   | 8.51   |
| C       | GO:0030325 | adrenal gland development                                                  | -4.75  | 4.54  | 5.28   | 13.03  |
| C       | GO:0060363 | cranial suture morphogenesis                                               | -0.61  | 3.31  | 5.56   | 10.84  |
| C       | GO:0097094 | craniofacial suture morphogenesis                                          | -0.61  | 3.31  | 5.56   | 10.84  |
| C       | GO:0007530 | sex determination                                                          | 0.90   | 4.71  | 5.18   | 12.76  |
| C       | GO:0045120 | pronucleus                                                                 | 3.91   | 2.19  | 9.69   | 5.30   |
| C       | GO:0045743 | positive regulation of fibroblast growth factor receptor signaling pathway | -0.47  | 4.84  | 1.36   | 1.89   |
| C       | GO:0035283 | central nervous system segmentation                                        | 0.21   | 5.86  | 1.64   | 2.28   |
| C       | GO:0035284 | brain segmentation                                                         | 0.21   | 5.86  | 1.64   | 2.28   |
| C       | GO:0045103 | intermediate filament-based process                                        | 0.89   | 5.19  | 1.37   | 1.75   |
| C       | GO:0045104 | intermediate filament cytoskeleton organization                            | 0.93   | 5.30  | 1.41   | 1.79   |
| C       | GO:0048892 | lateral line nerve development                                             | 1.26   | 6.61  | 2.59   | 1.98   |
| C       | GO:0048925 | lateral line system development                                            | 1.26   | 6.61  | 2.59   | 1.98   |
| C       | GO:0048880 | sensory system development                                                 | 1.31   | 5.75  | 2.44   | 1.89   |
| C       | GO:0001547 | antral ovarian follicle growth                                             | 1.59   | 6.66  | 4.14   | 1.37   |
| C       | GO:2000194 | regulation of female gonad development                                     | 1.73   | 7.13  | 4.17   | 1.28   |
| C       | GO:0060052 | neurofilament cytoskeleton organization                                    | 1.62   | 8.53  | 2.45   | 2.36   |
| C       | GO:0060053 | neurofilament cytoskeleton                                                 | 1.98   | 8.27  | 2.38   | 2.27   |
| C       | GO:0005883 | neurofilament                                                              | 2.22   | 10.01 | 2.91   | 2.76   |
| C       | GO:0017158 | regulation of calcium ion-dependent exocytosis                             | 0.72   | 5.71  | 6.23   | 3.58   |
| C       | GO:0045835 | negative regulation of meiosis                                             | 2.37   | 5.58  | 4.86   | 3.72   |
| C       | GO:0007128 | meiotic prophase I                                                         | 4.39   | 6.15  | 5.42   | 4.87   |

| <b>Cluster</b> | <b>GO Term</b> | <b>Name</b>                                   | <b>Day 5</b> | <b>Day 8</b> | <b>Day 11</b> | <b>Day 14</b> |
|----------------|----------------|-----------------------------------------------|--------------|--------------|---------------|---------------|
| C              | GO:0051324     | prophase                                      | 4.39         | 6.15         | 5.42          | 4.87          |
| C              | GO:0060631     | regulation of meiosis I                       | 4.15         | 5.31         | 4.32          | 3.65          |
| C              | GO:0048477     | oogenesis                                     | 4.89         | 5.14         | 4.93          | 3.57          |
| C              | GO:0032504     | multicellular organism reproduction           | 4.66         | 4.88         | 4.50          | 5.68          |
| C              | GO:0048609     | multicellular organismal reproductive process | 4.66         | 4.88         | 4.50          | 5.68          |
| C              | GO:0048610     | cellular process involved in reproduction     | 5.41         | 5.08         | 3.97          | 5.31          |
| C              | GO:0051177     | meiotic sister chromatid cohesion             | 5.95         | 5.24         | 5.05          | 4.74          |
| C              | GO:0007276     | gamete generation                             | 5.33         | 5.91         | 5.47          | 6.35          |
| C              | GO:0019953     | sexual reproduction                           | 5.65         | 6.15         | 5.79          | 6.50          |
| C              | GO:0007283     | spermatogenesis                               | 5.82         | 6.05         | 5.68          | 6.73          |
| C              | GO:0048232     | male gamete generation                        | 5.82         | 6.05         | 5.68          | 6.73          |
| C              | GO:0007127     | meiosis I                                     | 7.25         | 7.25         | 4.47          | 3.78          |
| C              | GO:0051321     | meiotic cell cycle                            | 7.15         | 5.53         | 3.54          | 3.08          |
| C              | GO:0007126     | meiosis                                       | 7.33         | 5.69         | 3.65          | 3.18          |
| C              | GO:0051327     | M phase of meiotic cell cycle                 | 7.33         | 5.69         | 3.65          | 3.18          |
| C              | GO:0070193     | synaptonemal complex organization             | 6.29         | 8.55         | 6.06          | 5.04          |
| C              | GO:0007130     | synaptonemal complex assembly                 | 6.69         | 9.26         | 6.55          | 5.46          |
| C              | GO:0000801     | central element                               | 7.39         | 8.48         | 5.41          | 4.55          |
| C              | GO:0070192     | chromosome organization involved in meiosis   | 9.39         | 10.50        | 6.53          | 5.64          |
| C              | GO:0007129     | synapsis                                      | 9.79         | 11.16        | 6.92          | 5.99          |
| D              | GO:0009055     | electron carrier activity                     | 7.54         | 0.76         | 2.95          | 1.19          |
| D              | GO:0046906     | tetrapyrrole binding                          | 7.79         | -1.46        | 2.93          | 1.27          |
| D              | GO:0020037     | heme binding                                  | 8.34         | -1.29        | 3.07          | 1.36          |
| D              | GO:0072593     | reactive oxygen species metabolic process     | 9.18         | 1.96         | 3.84          | 1.73          |
| D              | GO:0051320     | S phase                                       | 7.48         | 0.64         | 0.40          | 0.78          |
| D              | GO:0000084     | S phase of mitotic cell cycle                 | 8.41         | 0.77         | 0.33          | 0.79          |
| D              | GO:0046686     | response to cadmium ion                       | 8.69         | 1.38         | 0.42          | 0.69          |
| D              | GO:0045931     | positive regulation of mitotic cell cycle     | 7.73         | -0.40        | 0.35          | 0.44          |
| D              | GO:0006776     | vitamin A metabolic process                   | 7.71         | -0.45        | 0.09          | 0.47          |
| D              | GO:0009110     | vitamin biosynthetic process                  | 8.29         | -0.48        | 0.26          | 0.18          |
| D              | GO:0006720     | isoprenoid metabolic process                  | 8.39         | -0.70        | 0.34          | 0.41          |
| D              | GO:0033261     | regulation of S phase                         | 8.43         | -0.29        | 0.26          | 0.49          |
| D              | GO:0008299     | isoprenoid biosynthetic process               | 8.83         | -0.40        | 0.33          | 0.66          |
| D              | GO:0042737     | drug catabolic process                        | 8.74         | 0.09         | 0.25          | -0.07         |
| D              | GO:0009410     | response to xenobiotic stimulus               | 8.26         | -1.70        | 0.24          | 0.62          |
| D              | GO:0006805     | xenobiotic metabolic process                  | 8.62         | -1.81        | 0.28          | 0.63          |
| D              | GO:0071466     | cellular response to xenobiotic stimulus      | 8.62         | -1.81        | 0.28          | 0.63          |
| D              | GO:0019439     | aromatic compound catabolic process           | 8.72         | -1.22        | -1.40         | 0.28          |
| D              | GO:0042738     | exogenous drug catabolic process              | 9.16         | 0.09         | 0.31          | 0.31          |

| Cluster | GO Term    | Name                                                                                                  | Day 5 | Day 8 | Day 11 | Day 14 |
|---------|------------|-------------------------------------------------------------------------------------------------------|-------|-------|--------|--------|
| D       | GO:0016725 | oxidoreductase activity, acting on CH or CH2 groups                                                   | 9.56  | 0.15  | 0.33   | 0.30   |
| D       | GO:0070989 | oxidative demethylation                                                                               | 9.58  | 0.14  | 0.34   | 0.08   |
| D       | GO:0042573 | retinoic acid metabolic process                                                                       | 9.66  | -0.43 | 0.17   | 0.34   |
| D       | GO:0008395 | steroid hydroxylase activity                                                                          | 9.86  | -0.25 | 0.33   | 0.47   |
| D       | GO:0007090 | regulation of S phase of mitotic cell cycle                                                           | 10.00 | -0.27 | 0.30   | 0.48   |
| D       | GO:0042362 | fat-soluble vitamin biosynthetic process                                                              | 10.83 | -0.35 | 0.29   | 0.42   |
| D       | GO:0006721 | terpenoid metabolic process                                                                           | 11.08 | -0.49 | 0.16   | 0.09   |
| D       | GO:0006778 | porphyrin-containing compound metabolic process                                                       | 12.28 | 1.78  | 0.98   | 1.12   |
| D       | GO:0033013 | tetrapyrrole metabolic process                                                                        | 12.28 | 1.78  | 0.98   | 1.12   |
| D       | GO:0071276 | cellular response to cadmium ion                                                                      | 14.05 | 2.64  | 0.99   | 0.48   |
| D       | GO:0019748 | secondary metabolic process                                                                           | 12.36 | -0.55 | -0.32  | -0.66  |
| D       | GO:0016098 | monoterpenoid metabolic process                                                                       | 12.64 | 0.11  | 0.62   | 0.12   |
| D       | GO:0070988 | demethylation                                                                                         | 13.42 | 0.29  | 0.48   | 0.37   |
| D       | GO:0017144 | drug metabolic process                                                                                | 13.58 | 0.16  | 0.41   | 0.35   |
| D       | GO:0009698 | phenylpropanoid metabolic process                                                                     | 13.58 | -0.22 | 0.49   | 0.71   |
| D       | GO:0016712 | oxidoreductase activity, acting on paired donors, with incorporation or reduction of molecular oxygen | 14.78 | -0.18 | 0.50   | 0.69   |
| D       | GO:0042178 | xenobiotic catabolic process                                                                          | 14.82 | 0.12  | 0.63   | 0.83   |
| D       | GO:0070330 | aromatase activity                                                                                    | 15.19 | -0.21 | 0.51   | 0.53   |
| D       | GO:0032451 | demethylase activity                                                                                  | 16.16 | 0.23  | 0.60   | 0.77   |
| D       | GO:0035238 | vitamin A biosynthetic process                                                                        | 17.45 | 0.12  | 0.83   | 1.02   |
| D       | GO:0042904 | 9-cis-retinoic acid biosynthetic process                                                              | 17.45 | 0.12  | 0.83   | 1.02   |
| D       | GO:0042905 | 9-cis-retinoic acid metabolic process                                                                 | 17.45 | 0.12  | 0.83   | 1.02   |
| D       | GO:0009812 | flavonoid metabolic process                                                                           | 18.56 | -0.06 | 0.90   | 1.12   |
| D       | GO:0045750 | positive regulation of S phase of mitotic cell cycle                                                  | 19.07 | -0.05 | 0.95   | 1.20   |
| D       | GO:0016679 | oxidoreductase activity, acting on diphenols and related substances as donors                         | 19.42 | 0.13  | 1.01   | 1.24   |
| D       | GO:0009804 | coumarin metabolic process                                                                            | 19.56 | 0.04  | 0.94   | 1.21   |
| D       | GO:0017085 | response to insecticide                                                                               | 21.37 | 0.51  | 1.36   | 1.73   |
| D       | GO:0042743 | hydrogen peroxide metabolic process                                                                   | 16.46 | 3.10  | 7.31   | 3.48   |
| D       | GO:0042537 | benzene-containing compound metabolic process                                                         | 11.69 | -0.87 | -7.16  | -4.68  |
| D       | GO:0009404 | toxin metabolic process                                                                               | 26.96 | -0.13 | 1.39   | 1.21   |
| D       | GO:0050665 | hydrogen peroxide biosynthetic process                                                                | 28.86 | 0.18  | 1.62   | 1.30   |

Supplemental Table S4: Z-Scores of Top 100 GO Terms AHR-Positive 48 h TCDD vs Control Cells.

| Cluster | GO Term    | Name                                                     | Day 5 | Day 8  | Day 11 | Day 14 |
|---------|------------|----------------------------------------------------------|-------|--------|--------|--------|
| A       | GO:0060070 | canonical Wnt receptor signaling pathway                 | 3.12  | -10.99 | -1.35  | -3.63  |
| A       | GO:0016055 | Wnt receptor signaling pathway                           | 3.14  | -9.24  | -0.97  | -5.24  |
| A       | GO:0030509 | BMP signaling pathway                                    | 1.91  | -9.53  | 3.03   | -3.33  |
| A       | GO:0007341 | penetration of zona pellucida                            | 0.72  | -8.16  | 0.54   | -2.05  |
| A       | GO:0030215 | semaphorin receptor binding                              | 1.66  | -11.18 | -6.12  | -4.98  |
| A       | GO:0000904 | cell morphogenesis involved in differentiation           | 5.04  | -10.91 | -4.51  | -6.70  |
| A       | GO:0000902 | cell morphogenesis                                       | 6.29  | -10.11 | -4.16  | -5.48  |
| A       | GO:0032989 | cellular component morphogenesis                         | 7.66  | -9.88  | -4.77  | -6.26  |
| A       | GO:0002009 | morphogenesis of an epithelium                           | 6.53  | -9.26  | -2.80  | -8.96  |
| A       | GO:0051642 | centrosome localization                                  | 2.21  | -8.57  | -5.26  | -4.42  |
| A       | GO:0061371 | determination of heart left/right asymmetry              | 1.52  | -8.21  | -3.90  | -6.58  |
| A       | GO:0048812 | neuron projection morphogenesis                          | 3.52  | -9.07  | -4.20  | -6.04  |
| A       | GO:0007411 | axon guidance                                            | 2.77  | -8.72  | -4.09  | -5.53  |
| A       | GO:0048666 | neuron development                                       | 3.72  | -8.23  | -3.29  | -5.76  |
| A       | GO:0035239 | tube morphogenesis                                       | 4.31  | -8.13  | -3.19  | -5.74  |
| A       | GO:0031175 | neuron projection development                            | 4.40  | -7.98  | -3.43  | -5.91  |
| A       | GO:0048858 | cell projection morphogenesis                            | 3.89  | -8.05  | -3.51  | -5.11  |
| A       | GO:0032990 | cell part morphogenesis                                  | 3.76  | -8.03  | -3.47  | -5.01  |
| A       | GO:0009887 | organ morphogenesis                                      | 5.37  | -8.49  | -3.93  | -7.09  |
| A       | GO:0009792 | embryo development ending in birth or egg hatching       | 5.51  | -8.11  | -4.68  | -7.16  |
| A       | GO:0043009 | chordate embryonic development                           | 5.62  | -7.88  | -4.59  | -7.01  |
| A       | GO:0070848 | response to growth factor stimulus                       | 5.22  | -7.78  | -3.23  | -6.69  |
| A       | GO:0005916 | fascia adherens                                          | 5.45  | -4.26  | -6.53  | -7.31  |
| A       | GO:0008284 | positive regulation of cell proliferation                | 7.12  | -5.33  | -4.82  | -6.69  |
| A       | GO:0003007 | heart morphogenesis                                      | 4.59  | -5.41  | -3.16  | -7.96  |
| A       | GO:0040011 | locomotion                                               | 10.42 | -9.90  | -4.97  | -6.47  |
| A       | GO:0016477 | cell migration                                           | 11.58 | -9.42  | -4.88  | -6.00  |
| A       | GO:0048646 | anatomical structure formation involved in morphogenesis | 10.44 | -9.45  | -4.72  | -5.40  |
| A       | GO:0048870 | cell motility                                            | 10.91 | -8.90  | -4.54  | -5.66  |
| A       | GO:0051674 | localization of cell                                     | 10.91 | -8.90  | -4.54  | -5.66  |
| A       | GO:0006928 | cellular component movement                              | 10.47 | -8.33  | -4.43  | -5.30  |
| A       | GO:0005604 | basement membrane                                        | 14.33 | -3.53  | -2.46  | -6.04  |
| A       | GO:0031589 | cell-substrate adhesion                                  | 11.64 | -6.13  | -3.51  | -3.60  |
| A       | GO:0010810 | regulation of cell-substrate adhesion                    | 10.84 | -5.76  | -2.62  | -2.46  |
| A       | GO:0010811 | positive regulation of cell-substrate adhesion           | 10.03 | -5.16  | -3.30  | -2.52  |
| A       | GO:0051094 | positive regulation of developmental process             | 10.11 | -5.63  | -4.94  | -4.73  |

| Cluster | GO Term    | Name                                                             | Day 5 | Day 8  | Day 11 | Day 14 |
|---------|------------|------------------------------------------------------------------|-------|--------|--------|--------|
| A       | GO:0010740 | positive regulation of intracellular protein kinase cascade      | 9.48  | -4.35  | -4.69  | -4.33  |
| A       | GO:0010647 | positive regulation of cell communication                        | 9.45  | -5.40  | -3.77  | -4.19  |
| A       | GO:0048584 | positive regulation of response to stimulus                      | 8.97  | -4.88  | -3.16  | -3.43  |
| A       | GO:0044319 | wound healing, spreading of cells                                | 9.76  | -0.52  | -4.07  | -2.72  |
| A       | GO:0031032 | actomyosin structure organization                                | 9.66  | -0.91  | -4.44  | -5.54  |
| A       | GO:0030036 | actin cytoskeleton organization                                  | 10.18 | -2.81  | -3.22  | -3.32  |
| A       | GO:0051216 | cartilage development                                            | 9.20  | -2.20  | -2.06  | -5.03  |
| A       | GO:0030485 | smooth muscle contractile fiber                                  | 7.08  | 1.31   | -10.60 | -3.96  |
| A       | GO:0048729 | tissue morphogenesis                                             | 8.25  | -10.13 | 3.10   | -8.93  |
| A       | GO:0060429 | epithelium development                                           | 9.76  | -7.79  | 3.24   | -9.08  |
| A       | GO:0022603 | regulation of anatomical structure morphogenesis                 | 7.68  | -8.33  | 4.67   | -5.01  |
| A       | GO:0007169 | transmembrane receptor protein tyrosine kinase signaling pathway | 7.30  | -7.89  | 3.43   | -1.90  |
| A       | GO:0022610 | biological adhesion                                              | 13.61 | -9.47  | 4.00   | -6.45  |
| A       | GO:0007155 | cell adhesion                                                    | 13.72 | -9.36  | 4.00   | -6.53  |
| A       | GO:0072358 | cardiovascular system development                                | 11.76 | -8.29  | 8.15   | -5.34  |
| A       | GO:0072359 | circulatory system development                                   | 11.76 | -8.29  | 8.15   | -5.34  |
| A       | GO:0007167 | enzyme linked receptor protein signaling pathway                 | 11.12 | -9.29  | 6.15   | -2.79  |
| A       | GO:0048514 | blood vessel morphogenesis                                       | 11.35 | -7.64  | 6.18   | -4.02  |
| A       | GO:0031012 | extracellular matrix                                             | 13.06 | -7.55  | 3.94   | -4.83  |
| A       | GO:0030334 | regulation of cell migration                                     | 12.81 | -6.29  | 4.43   | -4.60  |
| A       | GO:0051270 | regulation of cellular component movement                        | 12.55 | -6.28  | 4.41   | -4.29  |
| A       | GO:2000145 | regulation of cell motility                                      | 12.44 | -6.09  | 4.23   | -4.41  |
| A       | GO:0040012 | regulation of locomotion                                         | 12.07 | -6.68  | 4.04   | -4.40  |
| A       | GO:0005578 | proteinaceous extracellular matrix                               | 12.19 | -6.38  | 3.27   | -4.11  |
| A       | GO:0044420 | extracellular matrix part                                        | 12.44 | -3.58  | 3.86   | -4.11  |
| A       | GO:0019838 | growth factor binding                                            | 10.78 | -4.57  | 5.43   | -4.01  |
| A       | GO:0007160 | cell-matrix adhesion                                             | 9.69  | -5.27  | 3.32   | -2.43  |
| A       | GO:0009967 | positive regulation of signal transduction                       | 9.76  | -5.36  | 4.16   | -4.33  |
| A       | GO:0023056 | positive regulation of signaling                                 | 9.35  | -5.42  | 3.72   | -4.11  |
| A       | GO:0009986 | cell surface                                                     | 9.42  | -7.18  | 4.15   | -3.79  |
| A       | GO:0005615 | extracellular space                                              | 9.01  | -6.45  | 4.28   | -3.38  |
| A       | GO:0030335 | positive regulation of cell migration                            | 13.48 | -3.13  | 2.69   | -2.10  |
| A       | GO:2000147 | positive regulation of cell motility                             | 13.28 | -3.10  | 2.60   | -2.03  |
| A       | GO:0051272 | positive regulation of cellular component movement               | 13.18 | -3.00  | 2.54   | -2.04  |
| A       | GO:0040017 | positive regulation of locomotion                                | 12.94 | -2.92  | 2.69   | -2.00  |
| A       | GO:0005178 | integrin binding                                                 | 12.08 | -2.62  | 3.44   | -2.05  |
| A       | GO:0005912 | adherens junction                                                | 10.83 | -2.64  | 4.06   | -3.57  |
| A       | GO:0070161 | anchoring junction                                               | 10.79 | -2.54  | 4.05   | -3.35  |

| Cluster | GO Term    | Name                                                            | Day 5 | Day 8 | Day 11 | Day 14 |
|---------|------------|-----------------------------------------------------------------|-------|-------|--------|--------|
| A       | GO:0042060 | wound healing                                                   | 10.67 | -1.25 | 4.26   | -4.27  |
| A       | GO:0030198 | extracellular matrix organization                               | 10.26 | -1.30 | 3.99   | -2.83  |
| A       | GO:0043062 | extracellular structure organization                            | 10.26 | -1.30 | 3.99   | -2.83  |
| A       | GO:0009611 | response to wounding                                            | 9.74  | -1.36 | 3.67   | -2.55  |
| A       | GO:0051146 | striated muscle cell differentiation                            | 9.37  | -3.72 | 3.44   | -3.05  |
| A       | GO:0055002 | striated muscle cell development                                | 9.18  | -2.56 | 3.33   | -2.84  |
| A       | GO:0048407 | platelet-derived growth factor binding                          | 11.26 | -1.77 | 7.19   | -7.04  |
| A       | GO:0005583 | fibrillar collagen                                              | 7.14  | -2.18 | 5.27   | -7.35  |
| A       | GO:0001944 | vasculature development                                         | 12.55 | -8.67 | 8.83   | 5.24   |
| A       | GO:0001568 | blood vessel development                                        | 12.72 | -7.66 | 9.10   | 5.45   |
| A       | GO:0001525 | angiogenesis                                                    | 11.55 | -5.94 | 5.19   | 3.38   |
| A       | GO:0030155 | regulation of cell adhesion                                     | 11.18 | -5.73 | 2.79   | 1.80   |
| A       | GO:0045785 | positive regulation of cell adhesion                            | 10.47 | -4.55 | 3.44   | 2.06   |
| A       | GO:0030054 | cell junction                                                   | 9.57  | -3.57 | 3.86   | 2.28   |
| A       | GO:0010595 | positive regulation of endothelial cell migration               | 9.72  | -2.31 | 5.23   | 4.97   |
| A       | GO:0032432 | actin filament bundle                                           | 13.98 | 5.78  | -3.61  | -2.14  |
| A       | GO:0001725 | stress fiber                                                    | 12.88 | 4.07  | -3.35  | -1.99  |
| A       | GO:0042641 | actomyosin                                                      | 12.15 | 3.71  | -3.04  | -1.70  |
| A       | GO:0015629 | actin cytoskeleton                                              | 12.21 | 5.21  | -3.75  | -3.01  |
| A       | GO:0030029 | actin filament-based process                                    | 10.58 | 3.17  | -3.08  | -3.17  |
| A       | GO:0004859 | phospholipase inhibitor activity                                | 12.60 | 2.69  | 0.44   | -0.99  |
| A       | GO:0005587 | collagen type IV                                                | 12.16 | -0.44 | -0.53  | -0.58  |
| A       | GO:0030935 | sheet-forming collagen                                          | 12.16 | -0.44 | -0.53  | -0.58  |
| A       | GO:0043236 | laminin binding                                                 | 11.21 | -1.19 | 1.30   | -1.21  |
| A       | GO:0050840 | extracellular matrix binding                                    | 11.60 | 1.43  | -2.17  | -2.05  |
| A       | GO:0010755 | regulation of plasminogen activation                            | 10.29 | 0.55  | -1.90  | -0.33  |
| A       | GO:0055102 | lipase inhibitor activity                                       | 9.82  | 1.89  | 0.71   | -0.50  |
| A       | GO:0030195 | negative regulation of blood coagulation                        | 8.92  | 0.93  | -0.38  | 0.18   |
| A       | GO:1900047 | negative regulation of hemostasis                               | 8.92  | 0.93  | -0.38  | 0.18   |
| A       | GO:0050819 | negative regulation of coagulation                              | 10.14 | 0.94  | 1.75   | 1.50   |
| A       | GO:0048661 | positive regulation of smooth muscle cell proliferation         | 9.43  | 1.14  | 2.70   | 1.72   |
| A       | GO:0048660 | regulation of smooth muscle cell proliferation                  | 8.93  | 1.46  | 2.47   | 1.19   |
| A       | GO:0060706 | cell differentiation involved in embryonic placenta development | 9.19  | 2.43  | 4.56   | 1.58   |
| A       | GO:0018149 | peptide cross-linking                                           | 9.39  | -0.29 | 3.32   | -0.67  |
| A       | GO:0034330 | cell junction organization                                      | 9.21  | -1.70 | 3.17   | 1.56   |
| A       | GO:0008092 | cytoskeletal protein binding                                    | 10.69 | 5.86  | 2.71   | -1.49  |
| A       | GO:0061061 | muscle structure development                                    | 10.69 | 5.47  | 4.42   | -3.84  |
| A       | GO:0042692 | muscle cell differentiation                                     | 9.52  | 3.23  | 4.19   | -2.51  |
| A       | GO:0005544 | calcium-dependent phospholipid binding                          | 10.78 | 2.47  | 1.73   | -1.90  |



| Cluster | GO Term    | Name                                                                              | Day 5 | Day 8 | Day 11 | Day 14 |
|---------|------------|-----------------------------------------------------------------------------------|-------|-------|--------|--------|
| A       | GO:0003779 | actin binding                                                                     | 10.15 | 3.04  | 2.28   | -2.22  |
| A       | GO:0030055 | cell-substrate junction                                                           | 9.06  | 2.46  | 1.92   | -1.83  |
| A       | GO:0005925 | focal adhesion                                                                    | 9.02  | 2.44  | 2.23   | -1.49  |
| A       | GO:0005924 | cell-substrate adherens junction                                                  | 8.96  | 2.26  | 2.09   | -1.69  |
| A       | GO:0030855 | epithelial cell differentiation                                                   | 8.21  | 5.30  | 2.51   | -8.73  |
| A       | GO:0030216 | keratinocyte differentiation                                                      | 7.60  | 4.36  | -1.18  | -7.95  |
| A       | GO:0009913 | epidermal cell differentiation                                                    | 6.78  | 5.32  | -1.41  | -7.50  |
| A       | GO:0048864 | stem cell development                                                             | 1.87  | 10.17 | 3.95   | -3.18  |
| A       | GO:0019827 | stem cell maintenance                                                             | 1.49  | 9.97  | 3.95   | -2.79  |
| A       | GO:0048863 | stem cell differentiation                                                         | 1.69  | 8.42  | 3.89   | -3.86  |
| A       | GO:0015245 | fatty acid transporter activity                                                   | 3.29  | 10.16 | -1.16  | -0.97  |
| A       | GO:0050542 | icosanoid binding                                                                 | 1.51  | 11.89 | 1.47   | 1.70   |
| A       | GO:0050543 | icosatetraenoic acid binding                                                      | 1.51  | 11.89 | 1.47   | 1.70   |
| A       | GO:0051782 | negative regulation of cell division                                              | -0.55 | 9.17  | -1.04  | 1.16   |
| A       | GO:0070841 | inclusion body assembly                                                           | 0.24  | 8.68  | 0.58   | 0.65   |
| A       | GO:0090083 | regulation of inclusion body assembly                                             | 0.61  | 8.29  | 0.44   | 0.93   |
| A       | GO:0000407 | pre-autophagosomal structure                                                      | 1.04  | 7.89  | 1.73   | 1.59   |
| A       | GO:0046546 | development of primary male sexual characteristics                                | -3.75 | 7.92  | -1.10  | -1.66  |
| A       | GO:0001829 | trophectodermal cell differentiation                                              | -1.92 | 8.59  | 3.61   | 4.33   |
| A       | GO:0001892 | embryonic placenta development                                                    | 8.84  | 7.20  | 8.47   | 5.00   |
| A       | GO:0001890 | placenta development                                                              | 8.63  | 6.83  | 9.08   | 6.55   |
| A       | GO:0043542 | endothelial cell migration                                                        | 9.11  | 3.49  | 6.53   | 5.32   |
| A       | GO:0010594 | regulation of endothelial cell migration                                          | 8.83  | 2.96  | 7.19   | 6.00   |
| A       | GO:0045662 | negative regulation of myoblast differentiation                                   | 3.09  | 4.56  | 7.20   | 6.28   |
| A       | GO:0060711 | labyrinthine layer development                                                    | 4.03  | 4.84  | 6.95   | 4.32   |
| A       | GO:0032878 | regulation of establishment or maintenance of cell polarity                       | 1.00  | 2.39  | 7.46   | 5.95   |
| A       | GO:0015665 | alcohol transmembrane transporter activity                                        | 0.97  | 3.28  | 6.99   | 6.04   |
| A       | GO:0045713 | low-density lipoprotein particle receptor biosynthetic process                    | 2.14  | 1.50  | 7.04   | 7.64   |
| A       | GO:0010871 | negative regulation of receptor biosynthetic process                              | 1.90  | 1.64  | 6.40   | 6.91   |
| A       | GO:0016936 | galactoside binding                                                               | 4.23  | 0.94  | 6.40   | 5.73   |
| A       | GO:0060712 | spongiotrophoblast layer development                                              | 2.75  | 1.35  | 6.36   | 3.48   |
| A       | GO:0009404 | toxin metabolic process                                                           | 5.79  | 2.70  | 3.68   | 6.93   |
| A       | GO:0048185 | activin binding                                                                   | -0.14 | -2.68 | 7.08   | 4.24   |
| A       | GO:0030033 | microvillus assembly                                                              | 0.66  | -0.88 | 6.45   | 5.34   |
| A       | GO:0019885 | antigen processing and presentation of endogenous peptide antigen via MHC class I | 0.59  | -3.38 | 3.33   | 8.95   |
| A       | GO:0002483 | antigen processing and presentation of endogenous peptide antigen                 | -0.17 | -3.00 | 2.87   | 7.78   |
| A       | GO:0019883 | antigen processing and presentation of endogenous antigen                         | 0.15  | -2.73 | 2.64   | 7.26   |

| Cluster | GO Term    | Name                                                           | Day 5 | Day 8 | Day 11 | Day 14 |
|---------|------------|----------------------------------------------------------------|-------|-------|--------|--------|
| A       | GO:0042573 | retinoic acid metabolic process                                | 2.23  | 0.81  | 3.11   | 8.85   |
| A       | GO:0035238 | vitamin A biosynthetic process                                 | 3.30  | 1.00  | 2.45   | 8.34   |
| A       | GO:0042904 | 9-cis-retinoic acid biosynthetic process                       | 3.30  | 1.00  | 2.45   | 8.34   |
| A       | GO:0042905 | 9-cis-retinoic acid metabolic process                          | 3.30  | 1.00  | 2.45   | 8.34   |
| A       | GO:0034754 | cellular hormone metabolic process                             | 1.79  | -1.11 | 4.28   | 7.52   |
| A       | GO:0004030 | aldehyde dehydrogenase [NAD(P)+] activity                      | 0.64  | 1.16  | 2.36   | 7.14   |
| A       | GO:0006776 | vitamin A metabolic process                                    | 1.33  | 0.85  | 2.58   | 7.08   |
| A       | GO:0001523 | retinoid metabolic process                                     | 1.05  | 0.90  | 2.37   | 6.61   |
| A       | GO:0016101 | diterpenoid metabolic process                                  | 1.05  | 0.90  | 2.37   | 6.61   |
| A       | GO:0060900 | embryonic camera-type eye formation                            | -0.67 | -0.57 | 2.47   | 6.96   |
| A       | GO:0042612 | MHC class I protein complex                                    | 0.61  | -1.51 | 2.27   | 6.60   |
| B       | GO:0048864 | stem cell development                                          | 1.87  | 10.17 | 3.95   | -3.18  |
| B       | GO:0019827 | stem cell maintenance                                          | 1.49  | 9.97  | 3.95   | -2.79  |
| B       | GO:0048863 | stem cell differentiation                                      | 1.69  | 8.42  | 3.89   | -3.86  |
| B       | GO:0015245 | fatty acid transporter activity                                | 3.29  | 10.16 | -1.16  | -0.97  |
| B       | GO:0050542 | icosanoid binding                                              | 1.51  | 11.89 | 1.47   | 1.70   |
| B       | GO:0050543 | icosatetraenoic acid binding                                   | 1.51  | 11.89 | 1.47   | 1.70   |
| B       | GO:0051782 | negative regulation of cell division                           | -0.55 | 9.17  | -1.04  | 1.16   |
| B       | GO:0070841 | inclusion body assembly                                        | 0.24  | 8.68  | 0.58   | 0.65   |
| B       | GO:0090083 | regulation of inclusion body assembly                          | 0.61  | 8.29  | 0.44   | 0.93   |
| B       | GO:0000407 | pre-autophagosomal structure                                   | 1.04  | 7.89  | 1.73   | 1.59   |
| B       | GO:0046546 | development of primary male sexual characteristics             | -3.75 | 7.92  | -1.10  | -1.66  |
| B       | GO:0001829 | trophectodermal cell differentiation                           | -1.92 | 8.59  | 3.61   | 4.33   |
| B       | GO:0001892 | embryonic placenta development                                 | 8.84  | 7.20  | 8.47   | 5.00   |
| B       | GO:0001890 | placenta development                                           | 8.63  | 6.83  | 9.08   | 6.55   |
| B       | GO:0043542 | endothelial cell migration                                     | 9.11  | 3.49  | 6.53   | 5.32   |
| B       | GO:0010594 | regulation of endothelial cell migration                       | 8.83  | 2.96  | 7.19   | 6.00   |
| B       | GO:0045662 | negative regulation of myoblast differentiation                | 3.09  | 4.56  | 7.20   | 6.28   |
| B       | GO:0060711 | labyrinthine layer development                                 | 4.03  | 4.84  | 6.95   | 4.32   |
| B       | GO:0032878 | regulation of establishment or maintenance of cell polarity    | 1.00  | 2.39  | 7.46   | 5.95   |
| B       | GO:0015665 | alcohol transmembrane transporter activity                     | 0.97  | 3.28  | 6.99   | 6.04   |
| B       | GO:0045713 | low-density lipoprotein particle receptor biosynthetic process | 2.14  | 1.50  | 7.04   | 7.64   |
| B       | GO:0010871 | negative regulation of receptor biosynthetic process           | 1.90  | 1.64  | 6.40   | 6.91   |
| B       | GO:0016936 | galactoside binding                                            | 4.23  | 0.94  | 6.40   | 5.73   |
| B       | GO:0060712 | spongiotrophoblast layer development                           | 2.75  | 1.35  | 6.36   | 3.48   |
| B       | GO:0009404 | toxin metabolic process                                        | 5.79  | 2.70  | 3.68   | 6.93   |
| B       | GO:0048185 | activin binding                                                | -0.14 | -2.68 | 7.08   | 4.24   |
| B       | GO:0030033 | microvillus assembly                                           | 0.66  | -0.88 | 6.45   | 5.34   |

| Cluster | GO Term    | Name                                                                                 | Day 5  | Day 8  | Day 11 | Day 14 |
|---------|------------|--------------------------------------------------------------------------------------|--------|--------|--------|--------|
| B       | GO:0019885 | antigen processing and presentation of endogenous peptide antigen via MHC class I    | 0.59   | -3.38  | 3.33   | 8.95   |
| B       | GO:0002483 | antigen processing and presentation of endogenous peptide antigen                    | -0.17  | -3.00  | 2.87   | 7.78   |
| B       | GO:0019883 | antigen processing and presentation of endogenous antigen                            | 0.15   | -2.73  | 2.64   | 7.26   |
| B       | GO:0042573 | retinoic acid metabolic process                                                      | 2.23   | 0.81   | 3.11   | 8.85   |
| B       | GO:0035238 | vitamin A biosynthetic process                                                       | 3.30   | 1.00   | 2.45   | 8.34   |
| B       | GO:0042904 | 9-cis-retinoic acid biosynthetic process                                             | 3.30   | 1.00   | 2.45   | 8.34   |
| B       | GO:0042905 | 9-cis-retinoic acid metabolic process                                                | 3.30   | 1.00   | 2.45   | 8.34   |
| B       | GO:0034754 | cellular hormone metabolic process                                                   | 1.79   | -1.11  | 4.28   | 7.52   |
| B       | GO:0004030 | aldehyde dehydrogenase [NAD(P)+] activity                                            | 0.64   | 1.16   | 2.36   | 7.14   |
| B       | GO:0006776 | vitamin A metabolic process                                                          | 1.33   | 0.85   | 2.58   | 7.08   |
| B       | GO:0001523 | retinoid metabolic process                                                           | 1.05   | 0.90   | 2.37   | 6.61   |
| B       | GO:0016101 | diterpenoid metabolic process                                                        | 1.05   | 0.90   | 2.37   | 6.61   |
| B       | GO:0060900 | embryonic camera-type eye formation                                                  | -0.67  | -0.57  | 2.47   | 6.96   |
| B       | GO:0042612 | MHC class I protein complex                                                          | 0.61   | -1.51  | 2.27   | 6.60   |
| C       | GO:0004551 | nucleotide diphosphatase activity                                                    | -11.22 | -9.96  | -9.57  | -6.96  |
| C       | GO:0010424 | DNA methylation on cytosine within a CG sequence                                     | -15.05 | -7.46  | -18.57 | -13.84 |
| C       | GO:0032776 | DNA methylation on cytosine                                                          | -15.05 | -7.46  | -18.57 | -13.84 |
| C       | GO:0006346 | methylation-dependent chromatin silencing                                            | -12.80 | -6.34  | -15.28 | -11.72 |
| C       | GO:0045322 | unmethylated CpG binding                                                             | -12.01 | -6.12  | -14.46 | -10.84 |
| C       | GO:0046498 | S-adenosylhomocysteine metabolic process                                             | -11.46 | -6.10  | -13.27 | -10.24 |
| C       | GO:0023019 | signal transduction involved in regulation of gene expression                        | -5.84  | -11.28 | 0.37   | -1.37  |
| C       | GO:0007509 | mesoderm migration involved in gastrulation                                          | -0.81  | -13.88 | -0.58  | -2.27  |
| C       | GO:0001839 | neural plate morphogenesis                                                           | -0.62  | -11.88 | -0.57  | -2.96  |
| C       | GO:0001840 | neural plate development                                                             | -1.03  | -10.64 | -0.64  | -2.75  |
| C       | GO:0060379 | cardiac muscle cell myoblast differentiation                                         | -0.55  | -10.21 | -0.35  | -2.59  |
| C       | GO:0004768 | stearoyl-CoA 9-desaturase activity                                                   | -1.34  | -10.14 | -3.24  | -3.29  |
| C       | GO:0016215 | acyl-CoA desaturase activity                                                         | -1.21  | -9.94  | -4.02  | -4.45  |
| C       | GO:0016717 | oxidoreductase activity, acting on paired donors, with oxidation of a pair of donors | -0.71  | -8.26  | -3.19  | -3.55  |
| C       | GO:0021915 | neural tube development                                                              | -1.96  | -8.49  | -1.12  | -3.85  |
| C       | GO:0001707 | mesoderm formation                                                                   | -3.59  | -10.89 | -3.06  | -2.86  |
| C       | GO:0001704 | formation of primary germ layer                                                      | -3.44  | -10.57 | -2.90  | -2.72  |
| C       | GO:0048332 | mesoderm morphogenesis                                                               | -3.44  | -10.41 | -2.82  | -2.65  |
| C       | GO:0048667 | cell morphogenesis involved in neuron differentiation                                | -2.90  | -8.87  | -3.29  | -4.95  |
| C       | GO:0007409 | axonogenesis                                                                         | -3.20  | -8.68  | -3.28  | -4.90  |
| C       | GO:0007498 | mesoderm development                                                                 | -4.75  | -9.21  | -3.26  | -3.89  |
| C       | GO:0005003 | ephrin receptor activity                                                             | -4.18  | -8.43  | -3.18  | -2.89  |
| C       | GO:0009952 | anterior/posterior pattern specification                                             | -4.34  | -8.01  | -2.39  | -3.13  |

| Cluster | GO Term    | Name                                                     | Day 5 | Day 8  | Day 11 | Day 14 |
|---------|------------|----------------------------------------------------------|-------|--------|--------|--------|
| C       | GO:0042758 | long-chain fatty acid catabolic process                  | -4.28 | -9.28  | -1.62  | -1.34  |
| C       | GO:0001561 | fatty acid alpha-oxidation                               | -4.65 | -9.25  | -1.72  | -1.32  |
| C       | GO:0031957 | very long-chain fatty acid-CoA ligase activity           | -3.94 | -8.66  | -1.44  | -1.17  |
| C       | GO:0035567 | non-canonical Wnt receptor signaling pathway             | -3.19 | -8.66  | -1.20  | -3.15  |
| C       | GO:0060346 | bone trabecula formation                                 | -4.16 | -8.54  | -1.19  | -2.60  |
| C       | GO:0061430 | bone trabecula morphogenesis                             | -4.16 | -8.54  | -1.19  | -2.60  |
| C       | GO:0017147 | Wnt-protein binding                                      | -3.99 | -8.08  | -1.30  | -2.52  |
| C       | GO:0035121 | tail morphogenesis                                       | -4.82 | -13.71 | -4.30  | -4.47  |
| C       | GO:0007369 | gastrulation                                             | -3.11 | -11.53 | -4.92  | -4.35  |
| C       | GO:0042074 | cell migration involved in gastrulation                  | -7.23 | -11.32 | -7.34  | -5.13  |
| C       | GO:0030903 | notochord development                                    | -4.61 | -11.89 | -6.02  | -7.05  |
| C       | GO:0044344 | cellular response to fibroblast growth factor stimulus   | -6.26 | -10.77 | -4.94  | -6.93  |
| C       | GO:0071774 | response to fibroblast growth factor stimulus            | -6.26 | -10.77 | -4.94  | -6.93  |
| C       | GO:0009948 | anterior/posterior axis specification                    | -6.00 | -9.91  | -5.70  | -5.56  |
| C       | GO:0048598 | embryonic morphogenesis                                  | -3.36 | -8.47  | -4.42  | -6.80  |
| C       | GO:0022008 | neurogenesis                                             | -5.15 | -8.50  | -4.98  | -6.46  |
| C       | GO:0030182 | neuron differentiation                                   | -4.35 | -8.63  | -4.71  | -6.76  |
| C       | GO:0048699 | generation of neurons                                    | -4.42 | -8.17  | -4.40  | -6.31  |
| C       | GO:0008543 | fibroblast growth factor receptor signaling pathway      | -6.75 | -8.18  | -4.76  | -6.01  |
| C       | GO:0035282 | segmentation                                             | -7.96 | -10.35 | -3.69  | -3.98  |
| C       | GO:0001756 | somitogenesis                                            | -7.17 | -9.72  | -3.79  | -3.41  |
| C       | GO:0061053 | somite development                                       | -6.78 | -9.20  | -3.82  | -4.43  |
| C       | GO:0046475 | glycerophospholipid catabolic process                    | -9.97 | -7.03  | -4.67  | -3.18  |
| C       | GO:0010508 | positive regulation of autophagy                         | -6.92 | -8.38  | -7.97  | -3.04  |
| C       | GO:0014054 | positive regulation of gamma-aminobutyric acid secretion | -1.27 | -9.57  | -10.69 | -11.48 |
| C       | GO:0051957 | positive regulation of amino acid transport              | -1.27 | -9.57  | -10.69 | -11.48 |
| C       | GO:0014050 | negative regulation of glutamate secretion               | -1.06 | -8.51  | -8.31  | -8.98  |
| C       | GO:0014052 | regulation of gamma-aminobutyric acid secretion          | -1.15 | -8.40  | -9.23  | -10.28 |
| C       | GO:0046942 | carboxylic acid transport                                | -2.20 | -9.42  | -7.15  | -6.66  |
| C       | GO:0015849 | organic acid transport                                   | -2.15 | -9.34  | -7.08  | -6.60  |
| C       | GO:0046943 | carboxylic acid transmembrane transporter activity       | -1.73 | -8.31  | -6.86  | -6.12  |
| C       | GO:0005342 | organic acid transmembrane transporter activity          | -1.65 | -8.18  | -6.74  | -6.02  |
| C       | GO:0015837 | amine transport                                          | -1.61 | -7.49  | -6.38  | -5.70  |
| C       | GO:0006865 | amino acid transport                                     | -1.18 | -8.83  | -8.63  | -7.93  |
| C       | GO:0015171 | amino acid transmembrane transporter activity            | -1.63 | -8.36  | -8.69  | -7.31  |
| C       | GO:0003333 | amino acid transmembrane transport                       | -1.73 | -7.66  | -8.34  | -7.26  |
| C       | GO:0071705 | nitrogen compound transport                              | -1.27 | -7.61  | -7.87  | -7.60  |
| C       | GO:0005275 | amine transmembrane transporter activity                 | -1.27 | -7.75  | -7.66  | -6.43  |

| Cluster | GO Term    | Name                                                      | Day 5 | Day 8 | Day 11 | Day 14 |
|---------|------------|-----------------------------------------------------------|-------|-------|--------|--------|
| C       | GO:0032892 | positive regulation of organic acid transport             | -2.63 | -6.35 | -6.98  | -6.90  |
| C       | GO:0043403 | skeletal muscle tissue regeneration                       | -2.50 | -4.18 | -6.87  | -7.26  |
| C       | GO:0014051 | gamma-aminobutyric acid secretion                         | -0.72 | -6.86 | -7.37  | -8.50  |
| C       | GO:0015812 | gamma-aminobutyric acid transport                         | -1.05 | -6.32 | -6.76  | -7.77  |
| C       | GO:0051955 | regulation of amino acid transport                        | -0.44 | -6.06 | -6.57  | -7.40  |
| C       | GO:0015179 | L-amino acid transmembrane transporter activity           | -0.80 | -5.46 | -6.18  | -6.03  |
| C       | GO:0014829 | vascular smooth muscle contraction                        | 3.98  | -0.84 | -7.92  | -4.02  |
| C       | GO:0043123 | positive regulation of I-kappaB kinase/NF-kappaB cascade  | 2.68  | -3.93 | -6.90  | -5.93  |
| C       | GO:0005865 | striated muscle thin filament                             | 4.94  | -1.50 | -6.54  | -7.25  |
| C       | GO:0060174 | limb bud formation                                        | -0.79 | -5.69 | -8.98  | -12.51 |
| C       | GO:0007512 | adult heart development                                   | -0.53 | -3.76 | -7.00  | -11.02 |
| C       | GO:0014866 | skeletal myofibril assembly                               | 2.44  | -2.31 | -7.66  | -9.54  |
| C       | GO:0030240 | skeletal muscle thin filament assembly                    | 2.44  | -2.31 | -7.66  | -9.54  |
| C       | GO:0045844 | positive regulation of striated muscle tissue development | 1.99  | -3.09 | -7.10  | -10.02 |
| C       | GO:0048636 | positive regulation of muscle organ development           | 1.99  | -3.09 | -7.10  | -10.02 |
| C       | GO:0072530 | purine-containing compound transmembrane transport        | -0.60 | -2.63 | -7.78  | -8.60  |
| C       | GO:0005243 | gap junction channel activity                             | -0.62 | -3.28 | -7.35  | -8.49  |
| C       | GO:0015174 | basic amino acid transmembrane transporter activity       | -0.50 | -4.15 | -6.85  | -8.97  |
| C       | GO:0090162 | establishment of epithelial cell polarity                 | 0.88  | -4.15 | -6.09  | -8.66  |
| C       | GO:0002070 | epithelial cell maturation                                | -0.39 | -2.77 | -6.16  | -7.39  |
| C       | GO:0015809 | arginine transport                                        | 0.36  | -3.28 | -6.08  | -7.78  |
| C       | GO:0015802 | basic amino acid transport                                | 0.08  | -2.99 | -5.03  | -6.70  |
| C       | GO:0001502 | cartilage condensation                                    | 4.85  | -1.52 | -4.66  | -11.13 |
| C       | GO:0005720 | nuclear heterochromatin                                   | -9.51 | -3.77 | -11.86 | -8.55  |
| C       | GO:0006349 | regulation of gene expression by genetic imprinting       | -8.11 | -3.90 | -10.79 | -8.25  |
| C       | GO:0000792 | heterochromatin                                           | -9.01 | -3.09 | -9.57  | -6.42  |
| C       | GO:0051571 | positive regulation of histone H3-K4 methylation          | -8.96 | -5.46 | -11.29 | -11.59 |
| C       | GO:0051573 | negative regulation of histone H3-K9 methylation          | -7.24 | -5.45 | -10.58 | -11.50 |
| C       | GO:0051570 | regulation of histone H3-K9 methylation                   | -7.60 | -4.52 | -10.57 | -10.28 |
| C       | GO:0031062 | positive regulation of histone methylation                | -7.25 | -4.26 | -10.06 | -9.74  |
| C       | GO:0010216 | maintenance of DNA methylation                            | -8.97 | -2.29 | -8.81  | -2.65  |
| C       | GO:0071514 | genetic imprinting                                        | -6.60 | -3.05 | -8.82  | -6.68  |
| C       | GO:0006342 | chromatin silencing                                       | -7.12 | -3.05 | -8.37  | -6.24  |
| C       | GO:0045814 | negative regulation of gene expression, epigenetic        | -6.77 | -2.75 | -7.85  | -5.80  |
| C       | GO:0031061 | negative regulation of histone methylation                | -5.13 | -3.78 | -8.62  | -8.75  |
| C       | GO:0031503 | protein complex localization                              | -5.92 | -3.77 | -8.06  | -8.24  |

| Cluster | GO Term    | Name                                                              | Day 5 | Day 8 | Day 11 | Day 14 |
|---------|------------|-------------------------------------------------------------------|-------|-------|--------|--------|
| C       | GO:0051567 | histone H3-K9 methylation                                         | -6.35 | -3.12 | -7.99  | -7.62  |
| C       | GO:0051569 | regulation of histone H3-K4 methylation                           | -5.56 | -3.52 | -7.26  | -7.56  |
| C       | GO:0043200 | response to amino acid stimulus                                   | -5.79 | -6.74 | -7.79  | -6.22  |
| C       | GO:0071230 | cellular response to amino acid stimulus                          | -6.23 | -5.66 | -7.85  | -5.58  |
| C       | GO:0071418 | cellular response to amine stimulus                               | -5.80 | -5.31 | -7.52  | -5.86  |
| C       | GO:0071417 | cellular response to organic nitrogen                             | -5.67 | -5.20 | -7.38  | -5.75  |
| C       | GO:0071229 | cellular response to acid                                         | -6.57 | -5.52 | -7.06  | -5.26  |
| C       | GO:0046128 | purine ribonucleoside metabolic process                           | -6.60 | -4.27 | -7.22  | -5.75  |
| C       | GO:0042278 | purine nucleoside metabolic process                               | -6.43 | -3.92 | -6.81  | -5.37  |
| C       | GO:0031054 | pre-miRNA processing                                              | -2.78 | -1.35 | -8.07  | -5.92  |
| C       | GO:0034661 | ncRNA catabolic process                                           | -3.55 | -1.36 | -7.22  | -4.48  |
| C       | GO:0035198 | miRNA binding                                                     | -3.01 | -1.94 | -6.81  | -4.99  |
| C       | GO:0035196 | production of miRNAs involved in gene silencing by miRNA          | -2.72 | -1.00 | -7.25  | -5.56  |
| C       | GO:0031050 | dsRNA fragmentation                                               | -2.57 | -0.88 | -6.86  | -5.28  |
| C       | GO:0070918 | production of small RNA involved in gene silencing by RNA         | -2.57 | -0.88 | -6.86  | -5.28  |
| C       | GO:0016458 | gene silencing                                                    | -5.24 | -1.69 | -7.68  | -5.58  |
| C       | GO:0006305 | DNA alkylation                                                    | -6.06 | -2.24 | -6.68  | -4.72  |
| C       | GO:0006306 | DNA methylation                                                   | -6.06 | -2.24 | -6.68  | -4.72  |
| C       | GO:0040029 | regulation of gene expression, epigenetic                         | -4.55 | -0.77 | -6.33  | -4.42  |
| C       | GO:0031060 | regulation of histone methylation                                 | -4.70 | -2.75 | -6.65  | -6.52  |
| C       | GO:0031641 | regulation of myelination                                         | -0.92 | -4.32 | -7.08  | -4.68  |
| C       | GO:0022010 | central nervous system myelination                                | -0.71 | -3.14 | -6.88  | -3.45  |
| C       | GO:0032291 | axon ensheathment in central nervous system                       | -0.71 | -3.14 | -6.88  | -3.45  |
| C       | GO:0045109 | intermediate filament organization                                | -1.28 | -2.59 | -0.61  | -15.52 |
| C       | GO:0045104 | intermediate filament cytoskeleton organization                   | -2.37 | -2.03 | -3.08  | -14.77 |
| C       | GO:0045103 | intermediate filament-based process                               | -2.26 | -1.94 | -2.97  | -14.48 |
| C       | GO:0000307 | cyclin-dependent protein kinase holoenzyme complex                | -3.48 | 1.87  | -3.07  | -9.47  |
| C       | GO:0071772 | response to BMP stimulus                                          | 1.28  | 1.43  | 1.45   | -11.36 |
| C       | GO:0071773 | cellular response to BMP stimulus                                 | 1.28  | 1.43  | 1.45   | -11.36 |
| C       | GO:0060272 | embryonic skeletal joint morphogenesis                            | 1.35  | 0.56  | 0.41   | -9.56  |
| C       | GO:0031424 | keratinization                                                    | 1.83  | -0.91 | 0.55   | -9.72  |
| C       | GO:0072498 | embryonic skeletal joint development                              | 1.05  | -0.50 | 0.27   | -9.04  |
| C       | GO:0060351 | cartilage development involved in endochondral bone morphogenesis | 3.05  | -2.65 | -1.27  | -7.99  |
| C       | GO:0045737 | positive regulation of cyclin-dependent protein kinase activity   | 4.27  | -1.62 | -0.89  | -7.45  |
| C       | GO:0030836 | positive regulation of actin filament depolymerization            | 0.19  | -0.24 | -3.64  | -6.67  |
| C       | GO:0005179 | hormone activity                                                  | 1.71  | -1.94 | 14.54  | 15.12  |

Supplemental Table S5. Expression levels of transcription factors that show differential expression between TCDD-treated AHR-positive cells and controls (Log2Fold change)

| geneid | symbol        | name                                                                              | Day 5 | Day 8 | Day 11 | Day 14 |
|--------|---------------|-----------------------------------------------------------------------------------|-------|-------|--------|--------|
| 11910  | <i>Atf3</i>   | activating transcription factor 3                                                 | 0.37  | 0.22  | 2.51   | 0.44   |
| 223922 | <i>Atf7</i>   | activating transcription factor 7                                                 | 0.21  | 0.28  | 1.01   | 0.23   |
| 12053  | <i>Bcl6</i>   | B-cell leukemia/lymphoma 6                                                        | 0.34  | 0.68  | 2.62   | 0.77   |
| 12578  | <i>Cdkn2a</i> | cyclin-dependent kinase inhibitor 2A                                              | 0.54  | 0.22  | 1.78   | 0.41   |
| 12606  | <i>Cebpa</i>  | CCAAT/enhancer binding protein (C/EBP), alpha                                     | -0.14 | 0.33  | 1.09   | 1.35   |
| 12705  | <i>Cited1</i> | Cbp/p300-interacting transactivator with Glu/Asp-rich carboxy-terminal domain 1   | 0.08  | 1.35  | 2.06   | 1.84   |
| 17684  | <i>Cited2</i> | Cbp/p300-interacting transactivator, with Glu/Asp-rich carboxy-terminal domain, 2 | 0.08  | 0.79  | 1.35   | 0.81   |
| 12914  | <i>Crebbp</i> | CREB binding protein                                                              | 0.02  | 0.19  | 0.06   | -0.03  |
| 12387  | <i>Ctnnb1</i> | catenin (cadherin associated protein), beta 1                                     | 0.00  | 0.08  | -0.16  | 0.14   |
| 13393  | <i>Dlx3</i>   | distal-less homeobox 3                                                            | 0.48  | 1.04  | 2.99   | 1.61   |
| 13819  | <i>Epas1</i>  | endothelial PAS domain protein 1                                                  | 0.43  | 0.11  | 0.17   | -0.06  |
| 23871  | <i>Ets1</i>   | E26 avian leukemia oncogene 1, 5' domain                                          | 0.45  | -0.06 | 1.79   | 0.00   |
| 15376  | <i>Foxa2</i>  | forkhead box A2                                                                   | -0.50 | -0.10 | 0.91   | 0.21   |
| 17300  | <i>Foxc1</i>  | forkhead box C1                                                                   | 0.53  | 0.26  | 1.28   | 1.48   |
| 14234  | <i>Foxc2</i>  | forkhead box C2                                                                   | 1.81  | 1.64  | 1.14   | 2.21   |
| 14106  | <i>Foxh1</i>  | forkhead box H1                                                                   | -0.72 | -0.82 | -1.01  | -1.25  |
| 108655 | <i>Foxp1</i>  | forkhead box P1                                                                   | -0.89 | -0.53 | -1.11  | -0.90  |
| 14461  | <i>Gata2</i>  | GATA binding protein 2                                                            | 0.73  | 1.41  | 1.65   | 2.09   |
| 14462  | <i>Gata3</i>  | GATA binding protein 3                                                            | 1.34  | 0.69  | 2.28   | 1.47   |
| 14463  | <i>Gata4</i>  | GATA binding protein 4                                                            | 0.59  | 0.19  | 0.84   | 0.69   |
| 14465  | <i>Gata6</i>  | GATA binding protein 6                                                            | 0.90  | 0.43  | 1.91   | 0.94   |
| 14472  | <i>Gbx2</i>   | gastrulation brain homeobox 2                                                     | 0.08  | -0.94 | -0.20  | -1.07  |
| 14634  | <i>Gli3</i>   | GLI-Kruppel family member GLI3                                                    | -0.24 | 0.06  | 0.29   | 0.20   |
| 15110  | <i>Hand1</i>  | heart and neural crest derivatives expressed transcript 1                         | 0.03  | 1.08  | 4.32   | 1.60   |
| 15111  | <i>Hand2</i>  | heart and neural crest derivatives expressed transcript 2                         | 1.14  | 1.37  | -0.86  | 1.55   |
| 433759 | <i>Hdac1</i>  | histone deacetylase 1                                                             | -0.07 | -0.01 | -0.29  | 0.00   |
| 15214  | <i>Hey2</i>   | hairy/enhancer-of-split related with YRPW motif 2                                 | -0.33 | 0.58  | 0.57   | 0.30   |
| 21405  | <i>Hnfla</i>  | HNF1 homeobox A                                                                   | 0.90  | 0.22  | -0.25  | 0.13   |
| 74318  | <i>Hopx</i>   | HOP homeobox                                                                      | -1.73 | -0.42 | -1.46  | -0.35  |
| 15394  | <i>Hoxa1</i>  | homeobox A1                                                                       | 0.59  | 0.77  | 1.76   | 1.08   |
| 15395  | <i>Hoxa10</i> | homeobox A10                                                                      | 1.22  | 0.93  | 1.19   | 0.44   |
| 15400  | <i>Hoxa3</i>  | homeobox A3                                                                       | 0.32  | 0.78  | 2.24   | 0.66   |
| 15410  | <i>Hoxb3</i>  | homeobox B3                                                                       | -1.18 | 0.60  | -1.56  | 0.54   |
| 15413  | <i>Hoxb5</i>  | homeobox B5                                                                       | 0.61  | 0.87  | -2.91  | -0.54  |
| 15430  | <i>Hoxd10</i> | homeobox D10                                                                      | 1.74  | 0.68  | -0.31  | 0.06   |

| <b>geneid</b> | <b>symbol</b> | <b>name</b>                                                                  | <b>Day 5</b> | <b>Day 8</b> | <b>Day 11</b> | <b>Day 14</b> |
|---------------|---------------|------------------------------------------------------------------------------|--------------|--------------|---------------|---------------|
| 50916         | <i>Irx4</i>   | Iroquois related homeobox 4 (Drosophila)                                     | 0.35         | -0.01        | 3.37          | 1.97          |
| 16392         | <i>Isl1</i>   | ISL1 transcription factor, LIM/homeodomain                                   | 0.24         | 0.32         | 0.70          | 1.07          |
| 16476         | <i>Jun</i>    | Jun oncogene                                                                 | 0.46         | 0.20         | 2.16          | 0.24          |
| 16598         | <i>Klf2</i>   | Kruppel-like factor 2 (lung)                                                 | 1.06         | 0.38         | 0.65          | 0.60          |
| 12224         | <i>Klf5</i>   | Kruppel-like factor 5                                                        | 0.32         | 0.11         | 1.53          | 0.28          |
| 16842         | <i>Lef1</i>   | lymphoid enhancer binding factor 1                                           | -2.34        | -0.25        | -2.59         | -0.86         |
| 17260         | <i>Mef2c</i>  | myocyte enhancer factor 2C                                                   | -1.39        | 0.47         | -2.19         | 0.23          |
| 17268         | <i>Meis1</i>  | Meis homeobox 1                                                              | 0.33         | 0.56         | 2.85          | 1.28          |
| 17292         | <i>Mesp1</i>  | mesoderm posterior 1                                                         | -1.05        | 0.08         | -0.37         | 0.39          |
| 17293         | <i>Mesp2</i>  | mesoderm posterior 2                                                         | 1.21         | 0.69         | -0.46         | 0.44          |
| 17387         | <i>Mmp14</i>  | matrix metalloproteinase 14 (membrane-inserted)                              | -0.32        | -0.15        | 2.52          | 0.15          |
| 17701         | <i>Msx1</i>   | homeobox, msh-like 1                                                         | -2.06        | 0.77         | -2.26         | -0.48         |
| 17869         | <i>Myc</i>    | myelocytomatosis oncogene                                                    | -0.83        | -0.31        | -0.54         | -0.58         |
| 18109         | <i>Mycn</i>   | v-myc myelocytomatosis viral related oncogene, neuroblastoma derived (avian) | -0.41        | -0.61        | -1.39         | -1.01         |
| 71950         | <i>Nanog</i>  | Nanog homeobox                                                               | 0.90         | 0.61         | 0.40          | 0.73          |
| 18091         | <i>Nkx2-5</i> | NK2 transcription factor related, locus 5 (Drosophila)                       | 0.10         | 0.04         | 0.06          | 0.81          |
| 18092         | <i>Nkx2-6</i> | NK2 transcription factor related, locus 6 (Drosophila)                       | -1.15        | -0.14        | -0.78         | -0.11         |
| 11819         | <i>Nr2f2</i>  | nuclear receptor subfamily 2, group F, member 2                              | 2.06         | 0.05         | 3.14          | 0.83          |
| 15370         | <i>Nr4a1</i>  | nuclear receptor subfamily 4, group A, member 1                              | -0.08        | 0.01         | 1.13          | 0.37          |
| 26423         | <i>Nr5a1</i>  | nuclear receptor subfamily 5, group A, member 1                              | -0.05        | -0.62        | 0.17          | 0.93          |
| 26424         | <i>Nr5a2</i>  | nuclear receptor subfamily 5, group A, member 2                              | 1.18         | 0.21         | 1.28          | 0.38          |
| 18505         | <i>Pax3</i>   | paired box gene 3                                                            | -0.21        | -0.23        | 1.36          | -0.68         |
| 18508         | <i>Pax6</i>   | paired box gene 6                                                            | -0.54        | -0.26        | -0.77         | -0.50         |
| 18741         | <i>Pitx2</i>  | paired-like homeodomain transcription factor 2                               | -0.41        | 0.30         | -1.07         | 0.05          |
| 18999         | <i>Pou5f1</i> | POU domain, class 5, transcription factor 1                                  | -0.57        | -0.18        | -0.79         | -0.32         |
| 19130         | <i>Prox1</i>  | prospero-related homeobox 1                                                  | -0.01        | 0.28         | 0.83          | 0.14          |
| 18933         | <i>Prrx1</i>  | paired related homeobox 1                                                    | -0.05        | 0.29         | 1.22          | -0.05         |
| 218772        | <i>Rarb</i>   | retinoic acid receptor, beta                                                 | 0.71         | 0.42         | 2.73          | 1.59          |
| 19411         | <i>Rarg</i>   | retinoic acid receptor, gamma                                                | -0.23        | -0.16        | -0.47         | -0.38         |
| 19697         | <i>Rela</i>   | v-rel reticuloendotheliosis viral oncogene homolog A (avian)                 | 0.24         | 0.08         | 1.21          | 0.13          |
| 12394         | <i>Runx1</i>  | runt related transcription factor 1                                          | -0.05        | -0.19        | 2.53          | 0.04          |
| 12393         | <i>Runx2</i>  | runt related transcription factor 2                                          | -0.04        | -0.35        | -0.44         | -1.21         |
| 20429         | <i>Shox2</i>  | short stature homeobox 2                                                     | 0.07         | 0.69         | 0.60          | 1.46          |
| 17127         | <i>Smad3</i>  | MAD homolog 3 (Drosophila)                                                   | 0.20         | 0.21         | 1.30          | 0.65          |
| 17128         | <i>Smad4</i>  | MAD homolog 4 (Drosophila)                                                   | 0.22         | 0.00         | 0.84          | -0.04         |
| 20665         | <i>Sox10</i>  | SRY-box containing gene 10                                                   | -0.04        | 0.00         | -1.41         | 0.15          |
| 20671         | <i>Sox17</i>  | SRY-box containing gene 17                                                   | 1.11         | 0.14         | 1.08          | 0.89          |
| 20672         | <i>Sox18</i>  | SRY-box containing gene 18                                                   | -0.26        | 0.17         | -2.47         | -0.11         |



| <b>geneid</b> | <b>symbol</b>        | <b>name</b>                                              | <b>Day 5</b> | <b>Day 8</b> | <b>Day 11</b> | <b>Day 14</b> |
|---------------|----------------------|----------------------------------------------------------|--------------|--------------|---------------|---------------|
| 20674         | <i>Sox2</i>          | SRY-box containing gene 2                                | 0.59         | 0.12         | -0.25         | 0.10          |
| 20677         | <i>Sox4</i>          | SRY-box containing gene 4                                | -0.42        | -0.09        | -0.12         | -0.19         |
| 20678         | <i>Sox5</i>          | SRY-box containing gene 5                                | 0.93         | -0.17        | 0.26          | 1.09          |
| 20679         | <i>Sox6</i>          | SRY-box containing gene 6                                | -0.19        | -0.45        | 1.04          | -0.36         |
| 20680         | <i>Sox7</i>          | SRY-box containing gene 7                                | 0.88         | 0.11         | 0.13          | -0.42         |
| 20681         | <i>Sox8</i>          | SRY-box containing gene 8                                | 0.68         | 0.68         | -0.72         | 0.17          |
| 20682         | <i>Sox9</i>          | SRY-box containing gene 9                                | 0.09         | -0.23        | 0.94          | 1.38          |
| 20848         | <i>Stat3</i>         | signal transducer and activator of transcription 3       | 0.35         | 0.27         | 1.25          | 0.37          |
| 20850         | <i>Stat5a</i>        | signal transducer and activator of transcription 5A      | 0.72         | 0.52         | 1.35          | 0.95          |
| 20997         | <i>T</i>             | brachyury                                                | -3.14        | -1.26        | -0.35         | -0.29         |
| 21349         | <i>Tall1</i>         | T-cell acute lymphocytic leukemia 1                      | -1.75        | 1.09         | -3.80         | -1.96         |
| 21380         | <i>Tbx1</i>          | T-box 1                                                  | 0.89         | -0.17        | 0.78          | 0.39          |
| 76365         | <i>Tbx18</i>         | T-box18                                                  | 1.05         | 0.35         | -0.29         | 0.22          |
| 21385         | <i>Tbx2</i>          | T-box 2                                                  | 0.26         | 0.74         | 0.83          | 1.13          |
| 57246         | <i>Tbx20</i>         | T-box 20                                                 | -0.40        | 0.29         | 0.25          | -0.45         |
| 21386         | <i>Tbx3</i>          | T-box 3                                                  | 1.59         | 0.84         | 2.22          | 1.29          |
| 21388         | <i>Tbx5</i>          | T-box 5                                                  | 0.48         | -0.09        | -0.12         | -0.46         |
| 21414         | <i>Tcf7</i>          | transcription factor 7, T-cell specific                  | -0.19        | -0.03        | -0.84         | -0.10         |
| 21415         | <i>Tcf7l1</i>        | transcription factor 7-like 1 (T-cell specific, HMG box) | 0.00         | 0.02         | -0.51         | 0.17          |
| 21416         | <i>Tcf7l2</i>        | transcription factor 7-like 2, T-cell specific, HMG-box  | -0.09        | 0.22         | 0.61          | 0.70          |
| 21676         | <i>Tead1</i>         | TEA domain family member 1                               | 0.06         | 0.07         | 1.30          | 0.25          |
| 21679         | <i>Tead4</i>         | TEA domain family member 4                               | 0.43         | 0.19         | 2.29          | 0.46          |
| 22059         | <i>Trp53</i>         | transformation related protein 53                        | 0.05         | -0.09        | -0.26         | -0.18         |
| 22431         | <i>Wt1</i>           | Wilms tumor 1 homolog                                    | -1.24        | -1.06        | -3.08         | -1.15         |
| 22773         | <i>Zic3</i>          | zinc finger protein of the cerebellum 3                  | -0.23        | -0.39        | -0.43         | -0.62         |
| 77128         | <i>A930001N09Rik</i> | RIKEN cDNA A930001N09 gene                               | 0.32         | 0.32         | 0.36          | 0.26          |
| 56321         | <i>Aatf</i>          | apoptosis antagonizing transcription factor              | 0.12         | 0.05         | -0.39         | -0.18         |
| 11538         | <i>Adnp</i>          | activity-dependent neuroprotective protein               | 0.09         | 0.11         | 0.03          | 0.13          |
| 240442        | <i>Adnp2</i>         | ADNP homeobox 2                                          | -0.07        | 0.32         | -0.16         | 0.19          |
| 17355         | <i>Aff1</i>          | AF4/FMR2 family, member 1                                | -0.13        | -0.31        | 0.60          | -0.47         |
| 16764         | <i>Aff3</i>          | AF4/FMR2 family, member 3                                | -0.58        | -0.18        | -1.25         | -0.40         |
| 226747        | <i>Ahctf1</i>        | AT hook containing transcription factor 1                | 0.02         | 0.12         | -0.25         | -0.01         |
| 11622         | <i>Ahr</i>           | aryl-hydrocarbon receptor                                | -0.32        | -0.40        | -0.52         | -0.44         |
| 216285        | <i>Alx1</i>          | ALX homeobox 1                                           | 0.29         | 0.78         | -0.72         | -0.23         |
| 11694         | <i>Alx3</i>          | aristaless-like homeobox 3                               | 0.88         | 1.72         | 0.75          | 0.33          |
| 11695         | <i>Alx4</i>          | aristaless-like homeobox 4                               | -0.39        | 0.08         | 0.49          | 1.08          |
| 11835         | <i>Ar</i>            | androgen receptor                                        | -1.41        | 0.27         | -3.25         | -0.71         |
| 13496         | <i>Arid3a</i>        | AT rich interactive domain 3A (BRIGHT-like)              | 0.51         | 0.69         | 2.38          | 1.01          |

| <b>geneid</b> | <b>symbol</b>   | <b>name</b>                                                                   | <b>Day 5</b> | <b>Day 8</b> | <b>Day 11</b> | <b>Day 14</b> |
|---------------|-----------------|-------------------------------------------------------------------------------|--------------|--------------|---------------|---------------|
| 11863         | <i>Arnt</i>     | aryl hydrocarbon receptor nuclear translocator                                | 0.09         | 0.23         | -0.18         | 0.18          |
| 11864         | <i>Arnt2</i>    | aryl hydrocarbon receptor nuclear translocator 2                              | -0.15        | -0.28        | -0.89         | -0.73         |
| 11865         | <i>Arntl</i>    | aryl hydrocarbon receptor nuclear translocator-like                           | -0.13        | 0.25         | 0.01          | 0.13          |
| 272322        | <i>Arntl2</i>   | aryl hydrocarbon receptor nuclear translocator-like 2                         | -0.36        | 0.28         | 1.31          | 0.95          |
| 11878         | <i>Arx</i>      | aristaless related homeobox                                                   | -0.17        | 0.27         | -1.13         | -0.09         |
| 17172         | <i>Ascl1</i>    | achaete-scute complex homolog 1 (Drosophila)                                  | -0.08        | 1.48         | -1.45         | -0.44         |
| 17173         | <i>Ascl2</i>    | achaete-scute complex homolog 2 (Drosophila)                                  | 0.30         | 0.17         | -0.99         | 0.42          |
| 11908         | <i>Atf1</i>     | activating transcription factor 1                                             | 0.01         | -0.01        | -0.43         | -0.24         |
| 11909         | <i>Atf2</i>     | activating transcription factor 2                                             | -0.09        | 0.00         | 0.02          | -0.18         |
| 11911         | <i>Atf4</i>     | activating transcription factor 4                                             | 0.36         | 0.01         | -0.13         | -0.31         |
| 107503        | <i>Atf5</i>     | activating transcription factor 5                                             | 0.79         | 0.57         | 0.38          | 0.09          |
| 12915         | <i>Atf6b</i>    | activating transcription factor 6 beta                                        | -0.74        | -0.34        | -0.38         | -0.37         |
| 330361        | <i>AW146020</i> | expressed sequence AW146020                                                   | -0.06        | -0.21        | -0.15         | 0.09          |
| 12013         | <i>Bach1</i>    | BTB and CNC homology 1                                                        | 0.10         | 0.20         | 0.08          | 0.11          |
| 12014         | <i>Bach2</i>    | BTB and CNC homology 2                                                        | 0.17         | 0.16         | 1.69          | 0.17          |
| 54422         | <i>Barhl1</i>   | BarH-like 1 (Drosophila)                                                      | 0.14         | -0.73        | 0.30          | -0.92         |
| 104382        | <i>Barhl2</i>   | BarH-like 2 (Drosophila)                                                      | -0.04        | 0.13         | -0.06         | -0.75         |
| 12022         | <i>Barx1</i>    | BarH-like homeobox 1                                                          | 0.67         | 0.21         | 0.83          | 0.97          |
| 12023         | <i>Barx2</i>    | BarH-like homeobox 2                                                          | 0.67         | 0.41         | -0.45         | 1.83          |
| 53314         | <i>Batf</i>     | basic leucine zipper transcription factor, ATF-like                           | -0.94        | -0.29        | -1.13         | 0.22          |
| 74481         | <i>Batf2</i>    | basic leucine zipper transcription factor, ATF-like 2                         | 0.41         | 0.44         | 1.15          | 0.06          |
| 381319        | <i>Batf3</i>    | basic leucine zipper transcription factor, ATF-like 3                         | -0.69        | 1.21         | -0.37         | 2.37          |
| 12051         | <i>Bcl3</i>     | B-cell leukemia/lymphoma 3                                                    | 0.35         | 0.68         | 1.68          | 1.04          |
| 107771        | <i>Bmyc</i>     | brain expressed myelocytomatosis oncogene                                     | -0.17        | 0.31         | -0.20         | 0.61          |
| 244813        | <i>Bsx</i>      | brain specific homeobox                                                       | -0.19        | -0.47        | 0.82          | 0.17          |
| 241066        | <i>Carf</i>     | calcium response factor                                                       | 0.04         | 0.03         | 0.44          | 0.35          |
| 12396         | <i>Cbfa2t2</i>  | core-binding factor, runt domain, alpha subunit 2, translocated to, 2 (human) | 0.31         | 0.17         | -0.11         | 0.25          |
| 12398         | <i>Cbfa2t3</i>  | core-binding factor, runt domain, alpha subunit 2, translocated to, 3 (human) | 0.95         | 0.85         | 1.61          | 1.53          |
| 12590         | <i>Cdx1</i>     | caudal type homeobox 1                                                        | 0.49         | 1.03         | 1.19          | 0.82          |
| 12591         | <i>Cdx2</i>     | caudal type homeobox 2                                                        | 0.13         | 1.63         | -0.24         | 2.14          |
| 12592         | <i>Cdx4</i>     | caudal type homeobox 4                                                        | -2.68        | -0.48        | -2.61         | -1.13         |
| 12608         | <i>Cebpb</i>    | CCAAT/enhancer binding protein (C/EBP), beta                                  | 0.56         | 0.71         | 0.68          | 1.23          |
| 12609         | <i>Cebpd</i>    | CCAAT/enhancer binding protein (C/EBP), delta                                 | 0.08         | -0.27        | -0.30         | -0.24         |
| 110794        | <i>Cebpe</i>    | CCAAT/enhancer binding protein (C/EBP), epsilon                               | -0.18        | 0.39         | -2.24         | 0.18          |
| 26371         | <i>Ciaol</i>    | cytosolic iron-sulfur protein assembly 1 homolog ( <i>S. cerevisiae</i> )     | 0.04         | 0.07         | -0.05         | 0.21          |
| 12753         | <i>Clock</i>    | circadian locomotor output cycles kaput                                       | 0.13         | 0.19         | 0.44          | 0.16          |
| 12912         | <i>Crebl</i>    | cAMP responsive element binding protein 1                                     | -0.25        | -0.10        | -0.34         | -0.29         |

| <b>geneid</b> | <b>symbol</b>  | <b>name</b>                                                     | <b>Day 5</b> | <b>Day 8</b> | <b>Day 11</b> | <b>Day 14</b> |
|---------------|----------------|-----------------------------------------------------------------|--------------|--------------|---------------|---------------|
| 12913         | <i>Creb3</i>   | cAMP responsive element binding protein 3                       | 0.40         | 0.23         | 2.15          | 0.30          |
| 26427         | <i>Creb3l1</i> | cAMP responsive element binding protein 3-like 1                | 0.05         | -0.05        | 1.58          | -0.05         |
| 208647        | <i>Creb3l2</i> | cAMP responsive element binding protein 3-like 2                | 0.30         | 0.40         | 2.38          | 0.89          |
| 208677        | <i>Creb3l3</i> | cAMP responsive element binding protein 3-like 3                | 0.09         | 0.09         | 1.07          | 0.06          |
| 78284         | <i>Creb3l4</i> | cAMP responsive element binding protein 3-like 4                | -0.20        | 0.36         | 0.68          | 0.48          |
| 231991        | <i>Creb5</i>   | cAMP responsive element binding protein 5                       | -0.09        | 0.26         | 1.90          | 0.12          |
| 232430        | <i>Crebl2</i>  | cAMP responsive element binding protein-like 2                  | 0.35         | 0.25         | 1.07          | 0.35          |
| 233490        | <i>Crebzf</i>  | CREB/ATF bZIP transcription factor                              | -0.33        | -0.18        | -0.30         | -0.20         |
| 12916         | <i>Crem</i>    | cAMP responsive element modulator                               | 0.19         | 0.24         | 0.27          | -0.12         |
| 12951         | <i>Crx</i>     | cone-rod homeobox containing gene                               | -0.20        | -0.05        | -0.07         | -0.10         |
| 215418        | <i>Csrnp1</i>  | cysteine-serine-rich nuclear protein 1                          | 0.02         | 0.35         | 0.67          | 0.21          |
| 207785        | <i>Csrnp2</i>  | cysteine-serine-rich nuclear protein 2                          | -0.02        | 0.50         | -0.39         | 0.30          |
| 77771         | <i>Csrnp3</i>  | cysteine-serine-rich nuclear protein 3                          | -0.27        | -0.09        | 0.19          | -0.47         |
| 13016         | <i>Ctbp1</i>   | C-terminal binding protein 1                                    | 0.00         | 0.01         | -0.19         | -0.02         |
| 13018         | <i>Ctcf</i>    | CCCTC-binding factor                                            | -0.07        | 0.08         | -0.54         | -0.09         |
| 13047         | <i>Cux1</i>    | cut-like homeobox 1                                             | 0.08         | 0.24         | -0.29         | 0.24          |
| 13048         | <i>Cux2</i>    | cut-like homeobox 2                                             | 0.58         | 0.34         | 0.91          | 0.59          |
| 13134         | <i>Dach1</i>   | dachshund 1 (Drosophila)                                        | -1.05        | 0.40         | -0.30         | 1.20          |
| 13170         | <i>Dbp</i>     | D site albumin promoter binding protein                         | 0.27         | 0.39         | -0.43         | 0.61          |
| 13172         | <i>Dbx1</i>    | developing brain homeobox 1                                     | 0.41         | 1.11         | -0.15         | 0.50          |
| 13198         | <i>Ddit3</i>   | DNA-damage inducible transcript 3                               | 0.89         | 0.56         | 1.00          | 0.16          |
| 13390         | <i>Dlx1</i>    | distal-less homeobox 1                                          | -0.38        | 0.88         | 0.28          | 0.91          |
| 13392         | <i>Dlx2</i>    | distal-less homeobox 2                                          | 1.16         | 0.21         | 0.37          | 0.63          |
| 13394         | <i>Dlx4</i>    | distal-less homeobox 4                                          | -0.45        | 0.99         | 1.40          | 1.34          |
| 13395         | <i>Dlx5</i>    | distal-less homeobox 5                                          | -0.21        | 0.18         | -0.16         | 0.59          |
| 13396         | <i>Dlx6</i>    | distal-less homeobox 6                                          | -0.79        | 1.06         | -2.81         | 1.31          |
| 140477        | <i>Dmbx1</i>   | diencephalon/mesencephalon homeobox 1                           | 0.54         | 0.30         | 0.75          | 0.82          |
| 50796         | <i>Dmrt1</i>   | doublesex and mab-3 related transcription factor 1              | 1.22         | 0.76         | -1.50         | 0.54          |
| 240590        | <i>Dmrt3</i>   | doublesex and mab-3 related transcription factor 3              | 1.05         | 0.71         | -0.39         | 2.21          |
| 242523        | <i>Dmrta1</i>  | doublesex and mab-3 related transcription factor like family A1 | -0.07        | -0.41        | -0.53         | -0.88         |
| 242620        | <i>Dmrta2</i>  | doublesex and mab-3 related transcription factor like family A2 | 0.88         | -0.14        | 1.80          | 0.43          |
| 56296         | <i>Dmrtb1</i>  | DMRT-like family B with proline-rich C-terminal, 1              | 0.90         | 0.14         | -2.15         | 0.23          |
| 71241         | <i>Dmrta2</i>  | doublesex and mab-3 related transcription factor like family C2 | 0.68         | 0.68         | 0.24          | 0.26          |
| 13555         | <i>E2f1</i>    | E2F transcription factor 1                                      | 0.33         | 0.00         | -0.33         | -0.09         |
| 242705        | <i>E2f2</i>    | E2F transcription factor 2                                      | -0.49        | -0.04        | 0.17          | -0.19         |
| 13557         | <i>E2f3</i>    | E2F transcription factor 3                                      | -0.37        | -0.15        | -0.29         | -0.26         |
| 104394        | <i>E2f4</i>    | E2F transcription factor 4                                      | -0.28        | -0.13        | -0.53         | -0.27         |
| 13559         | <i>E2f5</i>    | E2F transcription factor 5                                      | 0.17         | 0.04         | -0.22         | 0.22          |

| <b>geneid</b> | <b>symbol</b> | <b>name</b>                                                | <b>Day 5</b> | <b>Day 8</b> | <b>Day 11</b> | <b>Day 14</b> |
|---------------|---------------|------------------------------------------------------------|--------------|--------------|---------------|---------------|
| 50496         | <i>E2f6</i>   | E2F transcription factor 6                                 | 0.02         | 0.12         | -0.29         | -0.01         |
| 52679         | <i>E2f7</i>   | E2F transcription factor 7                                 | -0.15        | -0.02        | -0.30         | -0.19         |
| 108961        | <i>E2f8</i>   | E2F transcription factor 8                                 | -0.03        | 0.40         | 0.20          | 0.02          |
| 13591         | <i>Ebf1</i>   | early B-cell factor 1                                      | -1.31        | -0.75        | -0.34         | -0.45         |
| 26940         | <i>Ecsit</i>  | ECSIT homolog (Drosophila)                                 | -0.18        | -0.23        | -0.50         | -0.53         |
| 13653         | <i>Egr1</i>   | early growth response 1                                    | -0.72        | -0.34        | -0.38         | -0.61         |
| 13654         | <i>Egr2</i>   | early growth response 2                                    | -0.64        | 0.18         | -0.23         | -0.76         |
| 13661         | <i>Ehf</i>    | ets homologous factor                                      | 0.09         | -0.28        | 0.23          | 0.50          |
| 13709         | <i>Elf1</i>   | E74-like factor 1                                          | 0.32         | 0.49         | 1.10          | 0.70          |
| 69257         | <i>Elf2</i>   | E74-like factor 2                                          | 0.33         | 0.43         | 0.42          | 0.47          |
| 13710         | <i>Elf3</i>   | E74-like factor 3                                          | 0.88         | 0.54         | 0.47          | 0.87          |
| 56501         | <i>Elf4</i>   | E74-like factor 4 (ets domain transcription factor)        | 0.68         | 0.66         | 2.20          | 1.19          |
| 13711         | <i>Elf5</i>   | E74-like factor 5                                          | 1.08         | 1.35         | 1.06          | 2.31          |
| 13712         | <i>Elk1</i>   | ELK1, member of ETS oncogene family                        | 0.11         | 0.09         | 0.29          | 0.03          |
| 13713         | <i>Elk3</i>   | ELK3, member of ETS oncogene family                        | 0.01         | 0.66         | 1.59          | 0.69          |
| 13714         | <i>Elk4</i>   | ELK4, member of ETS oncogene family                        | -0.28        | 0.27         | 0.22          | -0.06         |
| 13796         | <i>Emx1</i>   | empty spiracles homolog 1 (Drosophila)                     | 0.85         | 0.94         | 1.21          | 2.95          |
| 13797         | <i>Emx2</i>   | empty spiracles homolog 2 (Drosophila)                     | -0.69        | 0.28         | 0.69          | 0.79          |
| 13798         | <i>En1</i>    | engrailed 1                                                | -0.22        | 0.35         | 1.01          | -0.03         |
| 13799         | <i>En2</i>    | engrailed 2                                                | 0.27         | 0.54         | -0.70         | 0.60          |
| 13813         | <i>Eomes</i>  | eomesodermin homolog (Xenopus laevis)                      | -0.48        | 0.53         | -0.31         | 1.07          |
| 328572        | <i>Ep300</i>  | E1A binding protein p300                                   | -0.05        | 0.15         | 0.09          | 0.01          |
| 13875         | <i>Erf</i>    | Ets2 repressor factor                                      | 0.52         | 0.20         | 0.24          | 0.23          |
| 13876         | <i>Erg</i>    | avian erythroblastosis virus E-26 (v-ets) oncogene related | -0.01        | 0.05         | -0.34         | 0.65          |
| 13982         | <i>Esr1</i>   | estrogen receptor 1 (alpha)                                | -0.41        | -0.13        | -0.78         | 1.23          |
| 13983         | <i>Esr2</i>   | estrogen receptor 2 (beta)                                 | -0.62        | -0.35        | -0.67         | -0.76         |
| 26379         | <i>Esrra</i>  | estrogen related receptor, alpha                           | 0.44         | 0.11         | 0.37          | 0.17          |
| 26380         | <i>Esrrb</i>  | estrogen related receptor, beta                            | 1.36         | 0.34         | 1.32          | 0.41          |
| 26381         | <i>Esrrg</i>  | estrogen-related receptor gamma                            | -0.22        | -0.46        | -0.85         | -0.54         |
| 23872         | <i>Ets2</i>   | E26 avian leukemia oncogene 2, 3' domain                   | 0.33         | 1.04         | 1.06          | 1.34          |
| 14009         | <i>Etv1</i>   | ets variant gene 1                                         | -1.81        | -0.78        | -1.17         | -1.47         |
| 14008         | <i>Etv2</i>   | ets variant gene 2                                         | -1.69        | -1.41        | -2.45         | -1.69         |
| 27049         | <i>Etv3</i>   | ets variant gene 3                                         | 0.22         | 0.40         | 0.89          | 0.53          |
| 18612         | <i>Etv4</i>   | ets variant gene 4 (E1A enhancer binding protein, E1AF)    | -0.57        | -0.49        | -0.13         | -1.03         |
| 104156        | <i>Etv5</i>   | ets variant gene 5                                         | -0.43        | -0.20        | -0.65         | -0.45         |
| 14011         | <i>Etv6</i>   | ets variant gene 6 (TEL oncogene)                          | -0.61        | 0.01         | -0.15         | -0.03         |
| 14028         | <i>Evx1</i>   | even skipped homeotic gene 1 homolog                       | -1.84        | -0.30        | -0.22         | -0.53         |
| 14029         | <i>Evx2</i>   | even skipped homeotic gene 2 homolog                       | 0.81         | 0.29         | -0.14         | 0.46          |
| 50754         | <i>Fbxw7</i>  | F-box and WD-40 domain protein 7                           | 0.04         | 0.00         | 0.13          | -0.06         |

| <b>geneid</b> | <b>symbol</b> | <b>name</b>                   | <b>Day 5</b> | <b>Day 8</b> | <b>Day 11</b> | <b>Day 14</b> |
|---------------|---------------|-------------------------------|--------------|--------------|---------------|---------------|
| 260298        | <i>Fev</i>    | FEV (ETS oncogene family)     | 0.31         | 0.29         | -0.64         | -0.68         |
| 14247         | <i>Fli1</i>   | Friend leukemia integration 1 | -0.25        | 1.27         | -0.50         | -0.46         |
| 14281         | <i>Fos</i>    | FBJ osteosarcoma oncogene     | 0.61         | 0.45         | 1.32          | 1.06          |
| 14282         | <i>Fosb</i>   | FBJ osteosarcoma oncogene B   | -0.01        | 0.69         | 0.64          | 0.93          |
| 14283         | <i>Fosl1</i>  | fos-like antigen 1            | -0.23        | 0.26         | 0.30          | -0.64         |
| 14284         | <i>Fosl2</i>  | fos-like antigen 2            | 0.59         | -0.19        | 3.63          | -0.08         |
| 15375         | <i>Foxa1</i>  | forkhead box A1               | 0.03         | -0.75        | 0.32          | 0.15          |
| 15377         | <i>Foxa3</i>  | forkhead box A3               | -0.30        | 0.19         | -0.57         | -0.20         |
| 64290         | <i>Foxb1</i>  | forkhead box B1               | -0.71        | 0.07         | 0.03          | -0.73         |
| 14240         | <i>Foxb2</i>  | forkhead box B2               | -0.13        | 1.18         | 1.45          | 1.20          |
| 15229         | <i>Foxd1</i>  | forkhead box D1               | 0.26         | -0.27        | -0.03         | 0.60          |
| 17301         | <i>Foxd2</i>  | forkhead box D2               | 1.13         | -0.40        | 0.80          | 1.39          |
| 15221         | <i>Foxd3</i>  | forkhead box D3               | -1.32        | -1.10        | -1.40         | -0.99         |
| 14237         | <i>Foxd4</i>  | forkhead box D4               | -1.51        | 0.12         | -0.34         | -1.31         |
| 110805        | <i>Foxe1</i>  | forkhead box E1               | 0.03         | -2.16        | 0.72          | 0.58          |
| 30923         | <i>Foxe3</i>  | forkhead box E3               | -0.13        | 0.85         | -0.14         | -0.11         |
| 15227         | <i>Foxfla</i> | forkhead box F1a              | 0.39         | 0.69         | 0.43          | 0.75          |
| 14238         | <i>Foxf2</i>  | forkhead box F2               | 0.86         | 0.02         | 1.00          | -0.57         |
| 14233         | <i>Foxi1</i>  | forkhead box I1               | 0.41         | 0.44         | -0.14         | -0.11         |
| 270004        | <i>Foxi2</i>  | forkhead box I2               | 0.03         | -0.53        | -0.15         | 1.62          |
| 15223         | <i>Foxj1</i>  | forkhead box J1               | 0.13         | -0.12        | -0.18         | 0.17          |
| 60611         | <i>Foxj2</i>  | forkhead box J2               | 0.35         | 0.73         | 1.26          | 0.78          |
| 230700        | <i>Foxj3</i>  | forkhead box J3               | 0.30         | 0.28         | 0.44          | 0.21          |
| 17425         | <i>Foxk1</i>  | forkhead box K1               | 0.11         | 0.26         | 0.12          | 0.02          |
| 68837         | <i>Foxk2</i>  | forkhead box K2               | -0.07        | -0.05        | -0.29         | -0.22         |
| 14241         | <i>Foxl1</i>  | forkhead box L1               | -0.01        | -0.02        | -0.16         | -0.63         |
| 26927         | <i>Foxl2</i>  | forkhead box L2               | 0.62         | -0.28        | 1.62          | -0.31         |
| 14235         | <i>Foxm1</i>  | forkhead box M1               | -0.04        | -0.14        | -0.39         | -0.03         |
| 15218         | <i>Foxn1</i>  | forkhead box N1               | 0.39         | -0.15        | 1.39          | -1.82         |
| 71375         | <i>Foxn3</i>  | forkhead box N3               | -0.14        | 0.29         | -0.09         | -0.10         |
| 116810        | <i>Foxn4</i>  | forkhead box N4               | 0.07         | 0.97         | -1.41         | 1.47          |
| 56458         | <i>Foxo1</i>  | forkhead box O1               | -0.04        | 0.03         | -0.07         | 0.07          |
| 56484         | <i>Foxo3</i>  | forkhead box O3               | 0.44         | 0.45         | 0.11          | 0.38          |
| 54601         | <i>Foxo4</i>  | forkhead box O4               | -0.36        | 0.78         | -0.44         | 0.91          |
| 329934        | <i>Foxo6</i>  | forkhead box O6               | 0.56         | 0.77         | -0.57         | 1.17          |
| 114142        | <i>Foxp2</i>  | forkhead box P2               | -0.25        | -0.25        | 0.38          | -0.39         |
| 20371         | <i>Foxp3</i>  | forkhead box P3               | -0.42        | -0.15        | -0.15         | -0.15         |
| 74123         | <i>Foxp4</i>  | forkhead box P4               | 0.00         | -0.03        | 0.00          | 0.22          |
| 15220         | <i>Foxq1</i>  | forkhead box Q1               | 0.75         | 0.19         | 3.05          | 0.68          |
| 382074        | <i>Foxr1</i>  | forkhead box R1               | 0.03         | -0.22        | -0.04         | -0.51         |

| <b>geneid</b> | <b>symbol</b>   | <b>name</b>                                                    | <b>Day 5</b> | <b>Day 8</b> | <b>Day 11</b> | <b>Day 14</b> |
|---------------|-----------------|----------------------------------------------------------------|--------------|--------------|---------------|---------------|
| 436240        | <i>Foxr2</i>    | forkhead box R2                                                | -1.63        | -1.00        | -1.55         | -1.42         |
| 14239         | <i>Foxs1</i>    | forkhead box S1                                                | 0.90         | -1.75        | -0.14         | 0.50          |
| 14390         | <i>Gabpa</i>    | GA repeat binding protein, alpha                               | -0.08        | -0.02        | -0.14         | -0.20         |
| 14460         | <i>Gata1</i>    | GATA binding protein 1                                         | 0.97         | 1.41         | -0.32         | -1.27         |
| 14464         | <i>Gata5</i>    | GATA binding protein 5                                         | -0.38        | 1.01         | 1.10          | 0.43          |
| 67210         | <i>Gatad1</i>   | GATA zinc finger domain containing 1                           | -0.05        | -0.19        | -0.09         | -0.09         |
| 229542        | <i>Gatad2b</i>  | GATA zinc finger domain containing 2B                          | 0.11         | 0.25         | 0.04          | -0.04         |
| 231044        | <i>Gbx1</i>     | gastrulation brain homeobox 1                                  | 0.29         | -1.46        | -0.31         | -0.59         |
| 67367         | <i>Gcfc1</i>    | GC-rich sequence DNA-binding factor 1                          | -0.16        | -0.14        | -0.02         | -0.14         |
| 14531         | <i>Gcm1</i>     | glial cells missing homolog 1 (Drosophila)                     | 0.21         | 0.12         | -0.72         | -1.64         |
| 107889        | <i>Gcm2</i>     | glial cells missing homolog 2 (Drosophila)                     | 0.41         | 0.86         | -0.14         | 0.68          |
| 14633         | <i>Gli2</i>     | GLI-Kruppel family member GLI2                                 | 0.06         | -0.35        | -0.05         | -0.35         |
| 83396         | <i>Glis2</i>    | GLIS family zinc finger 2                                      | -0.12        | 0.13         | 0.82          | 0.46          |
| 226075        | <i>Glis3</i>    | GLIS family zinc finger 3                                      | 0.01         | 0.42         | 0.93          | 0.51          |
| 225908        | <i>Gm98</i>     | predicted gene 98                                              | -1.48        | -1.35        | -1.43         | -1.99         |
| 56809         | <i>Gmeb1</i>    | glucocorticoid modulatory element binding protein 1            | -0.40        | -0.24        | -0.65         | -0.44         |
| 73274         | <i>Gpbp1</i>    | GC-rich promoter binding protein 1                             | 0.23         | 0.26         | 0.06          | 0.26          |
| 195733        | <i>Grhl1</i>    | grainyhead-like 1 (Drosophila)                                 | 0.40         | -0.03        | -0.18         | 0.31          |
| 252973        | <i>Grhl2</i>    | grainyhead-like 2 (Drosophila)                                 | -0.18        | -0.49        | -0.57         | -0.33         |
| 14836         | <i>Gsc</i>      | goosecoid homeobox                                             | 0.46         | 0.87         | -0.31         | 1.99          |
| 195333        | <i>Gsc2</i>     | goosecoid homeobox 2                                           | 0.51         | 0.24         | -1.02         | 1.18          |
| 14842         | <i>Gsx1</i>     | GS homeobox 1                                                  | -0.74        | 0.04         | -2.10         | -1.56         |
| 14843         | <i>Gsx2</i>     | GS homeobox 2                                                  | 2.28         | 0.13         | -0.08         | 1.46          |
| 57080         | <i>Gtf2ird1</i> | general transcription factor II I repeat domain-containing 1   | 0.13         | -0.02        | -0.06         | 0.18          |
| 66596         | <i>Gtf3a</i>    | general transcription factor III A                             | 0.05         | 0.03         | -0.26         | -0.01         |
| 15182         | <i>Hdac2</i>    | histone deacetylase 2                                          | -0.06        | -0.07        | -0.09         | -0.07         |
| 245596        | <i>Hdx</i>      | highly divergent homeobox                                      | -0.75        | -0.12        | -0.57         | -0.77         |
| 234219        | <i>Helt</i>     | Hey-like transcription factor (zebrafish)                      | 0.14         | 0.44         | -0.66         | -1.08         |
| 15205         | <i>Hes1</i>     | hairy and enhancer of split 1 (Drosophila)                     | -0.24        | -0.03        | 0.44          | 0.41          |
| 55927         | <i>Hes6</i>     | hairy and enhancer of split 6 (Drosophila)                     | -0.93        | -0.56        | -1.58         | -0.64         |
| 15209         | <i>Hesx1</i>    | homeobox gene expressed in ES cells                            | 1.06         | -0.01        | 0.15          | 0.33          |
| 15213         | <i>Hey1</i>     | hairy/enhancer-of-split related with YRPW motif 1              | -0.29        | 0.02         | 0.03          | 0.85          |
| 56198         | <i>Heyl</i>     | hairy/enhancer-of-split related with YRPW motif-like           | -0.37        | 0.86         | 0.04          | 1.23          |
| 15242         | <i>Hhex</i>     | hematopoietically expressed homeobox                           | 0.26         | 0.28         | 0.05          | 0.30          |
| 15251         | <i>Hif1a</i>    | hypoxia inducible factor 1, alpha subunit                      | -0.05        | 0.18         | -0.15         | -0.01         |
| 53417         | <i>Hif3a</i>    | hypoxia inducible factor 3, alpha subunit                      | 0.02         | -0.02        | -0.63         | 0.43          |
| 102423        | <i>Hinfp</i>    | histone H4 transcription factor                                | 0.07         | 0.14         | 0.39          | -0.01         |
| 15273         | <i>Hivep2</i>   | human immunodeficiency virus type I enhancer binding protein 2 | -0.64        | 0.19         | 1.11          | 0.25          |

| <b>geneid</b> | <b>symbol</b>  | <b>name</b>                                 | <b>Day 5</b> | <b>Day 8</b> | <b>Day 11</b> | <b>Day 14</b> |
|---------------|----------------|---------------------------------------------|--------------|--------------|---------------|---------------|
| 217082        | <i>Hlf</i>     | hepatic leukemia factor                     | -0.74        | -0.80        | -1.35         | -2.22         |
| 15284         | <i>Hlx</i>     | H2.0-like homeobox                          | -0.56        | 1.14         | 0.13          | 0.25          |
| 219150        | <i>Hmbox1</i>  | homeobox containing 1                       | -0.13        | 0.31         | 0.38          | 0.06          |
| 15353         | <i>Hmg20b</i>  | high mobility group 20 B                    | 0.24         | 0.07         | 0.70          | 0.40          |
| 15361         | <i>Hmgal</i>   | high mobility group AT-hook 1               | -0.26        | -0.43        | -1.18         | -0.74         |
| 15289         | <i>Hmgb1</i>   | high mobility group box 1                   | -0.15        | -0.11        | -0.84         | -0.33         |
| 97165         | <i>Hmgb2</i>   | high mobility group box 2                   | 0.03         | -0.01        | -0.83         | -0.25         |
| 15371         | <i>Hmx1</i>    | H6 homeobox 1                               | 0.41         | 0.99         | -0.04         | 1.60          |
| 15372         | <i>Hmx2</i>    | H6 homeobox 2                               | 0.27         | 0.38         | -0.14         | 0.23          |
| 15373         | <i>Hmx3</i>    | H6 homeobox 3                               | 0.91         | 0.08         | -0.14         | -0.11         |
| 21410         | <i>Hnf1b</i>   | HNF1 homeobox B                             | 0.56         | 0.47         | 0.63          | 1.49          |
| 15378         | <i>Hnf4a</i>   | hepatic nuclear factor 4, alpha             | 0.41         | 0.88         | 0.85          | 1.96          |
| 30942         | <i>Hnf4g</i>   | hepatocyte nuclear factor 4, gamma          | 0.11         | -0.13        | 0.10          | -0.11         |
| 15384         | <i>Hnrnpab</i> | heterogeneous nuclear ribonucleoprotein A/B | -0.14        | -0.15        | -0.57         | -0.27         |
| 239099        | <i>Homez</i>   | homeodomain leucine zipper-encoding gene    | -0.49        | 0.07         | -0.41         | 0.06          |
| 15396         | <i>Hoxa11</i>  | homeobox A11                                | 0.48         | 0.68         | 0.03          | -0.26         |
| 15398         | <i>Hoxa13</i>  | homeobox A13                                | 0.81         | 0.61         | 0.86          | 1.32          |
| 15399         | <i>Hoxa2</i>   | homeobox A2                                 | 0.64         | 0.07         | 0.23          | 0.36          |
| 15401         | <i>Hoxa4</i>   | homeobox A4                                 | 0.08         | 1.53         | -1.09         | 1.41          |
| 15402         | <i>Hoxa5</i>   | homeobox A5                                 | -0.13        | 1.56         | 0.33          | 0.45          |
| 15403         | <i>Hoxa6</i>   | homeobox A6                                 | 0.81         | 0.52         | 0.86          | 1.48          |
| 15404         | <i>Hoxa7</i>   | homeobox A7                                 | 0.46         | 0.51         | 0.31          | 0.16          |
| 15405         | <i>Hoxa9</i>   | homeobox A9                                 | -0.70        | 1.05         | -0.27         | 0.09          |
| 15407         | <i>Hoxb1</i>   | homeobox B1                                 | -0.89        | 0.93         | -2.89         | -0.53         |
| 15408         | <i>Hoxb13</i>  | homeobox B13                                | -0.46        | 0.87         | -0.16         | 0.79          |
| 103889        | <i>Hoxb2</i>   | homeobox B2                                 | -0.93        | 0.68         | -2.85         | 1.54          |
| 15412         | <i>Hoxb4</i>   | homeobox B4                                 | 0.78         | 0.31         | 0.93          | 0.78          |
| 15414         | <i>Hoxb6</i>   | homeobox B6                                 | 1.48         | 0.44         | -1.57         | -1.08         |
| 15415         | <i>Hoxb7</i>   | homeobox B7                                 | 0.18         | 0.99         | -0.16         | -0.38         |
| 15416         | <i>Hoxb8</i>   | homeobox B8                                 | -0.12        | 0.05         | -0.56         | -1.09         |
| 15417         | <i>Hoxb9</i>   | homeobox B9                                 | 0.61         | -0.99        | 1.49          | -1.98         |
| 209448        | <i>Hoxc10</i>  | homeobox C10                                | 0.60         | 1.29         | -1.05         | 1.21          |
| 109663        | <i>Hoxc11</i>  | homeobox C11                                | 0.81         | -0.17        | -0.14         | -0.11         |
| 15421         | <i>Hoxc12</i>  | homeobox C12                                | -0.59        | -0.12        | -0.50         | -0.07         |
| 15422         | <i>Hoxc13</i>  | homeobox C13                                | 0.61         | -0.52        | 0.41          | 0.02          |
| 15423         | <i>Hoxc4</i>   | homeobox C4                                 | 0.15         | 0.93         | 0.69          | 2.02          |
| 15424         | <i>Hoxc5</i>   | homeobox C5                                 | -0.22        | 0.93         | -0.22         | -0.27         |
| 15425         | <i>Hoxc6</i>   | homeobox C6                                 | 1.10         | 0.19         | 0.37          | 0.54          |
| 15426         | <i>Hoxc8</i>   | homeobox C8                                 | -0.26        | 0.26         | -0.17         | -0.30         |
| 15427         | <i>Hoxc9</i>   | homeobox C9                                 | 1.41         | 0.20         | -0.42         | 0.62          |

| <b>geneid</b> | <b>symbol</b> | <b>name</b>                                     | <b>Day 5</b> | <b>Day 8</b> | <b>Day 11</b> | <b>Day 14</b> |
|---------------|---------------|-------------------------------------------------|--------------|--------------|---------------|---------------|
| 15429         | <i>Hoxd1</i>  | homeobox D1                                     | -1.32        | 0.79         | -0.85         | 1.07          |
| 15431         | <i>Hoxd11</i> | homeobox D11                                    | 0.50         | 0.65         | -1.41         | 0.20          |
| 15432         | <i>Hoxd12</i> | homeobox D12                                    | 1.08         | 0.08         | -2.14         | -0.68         |
| 15433         | <i>Hoxd13</i> | homeobox D13                                    | -0.57        | 0.60         | -2.50         | -0.07         |
| 15434         | <i>Hoxd3</i>  | homeobox D3                                     | -1.01        | 0.59         | -0.92         | 0.18          |
| 15436         | <i>Hoxd4</i>  | homeobox D4                                     | 1.06         | 1.51         | -0.94         | 1.72          |
| 15437         | <i>Hoxd8</i>  | homeobox D8                                     | 1.28         | 0.02         | 2.43          | 1.04          |
| 15438         | <i>Hoxd9</i>  | homeobox D9                                     | 0.54         | 1.74         | 1.54          | 0.95          |
| 15499         | <i>Hsf1</i>   | heat shock factor 1                             | -0.09        | 0.14         | -0.06         | 0.12          |
| 15500         | <i>Hsf2</i>   | heat shock factor 2                             | 0.23         | 0.03         | -0.07         | -0.04         |
| 245525        | <i>Hsf3</i>   | heat shock transcription factor 3               | -0.13        | 0.44         | -0.52         | -0.54         |
| 26386         | <i>Hsf4</i>   | heat shock transcription factor 4               | 0.56         | 0.31         | -0.08         | 0.82          |
| 327992        | <i>Hsf5</i>   | heat shock transcription factor family member 5 | 0.31         | -0.08        | -0.57         | 0.23          |
| 15901         | <i>Id1</i>    | inhibitor of DNA binding 1                      | -0.19        | -0.21        | 0.51          | 0.66          |
| 22778         | <i>Ikzf1</i>  | IKAROS family zinc finger 1                     | -0.76        | 0.72         | -0.62         | 0.44          |
| 16362         | <i>Irf1</i>   | interferon regulatory factor 1                  | -0.73        | 0.06         | -1.40         | -0.04         |
| 16363         | <i>Irf2</i>   | interferon regulatory factor 2                  | 0.20         | 1.01         | 2.15          | 1.15          |
| 54131         | <i>Irf3</i>   | interferon regulatory factor 3                  | -0.07        | 0.09         | 0.16          | 0.27          |
| 16364         | <i>Irf4</i>   | interferon regulatory factor 4                  | -0.37        | 1.54         | -1.68         | -0.42         |
| 27056         | <i>Irf5</i>   | interferon regulatory factor 5                  | 0.16         | -0.10        | 0.99          | 0.54          |
| 54139         | <i>Irf6</i>   | interferon regulatory factor 6                  | 0.58         | -0.18        | 1.45          | 0.37          |
| 54123         | <i>Irf7</i>   | interferon regulatory factor 7                  | 0.08         | 1.87         | 0.04          | 2.72          |
| 15900         | <i>Irf8</i>   | interferon regulatory factor 8                  | -0.70        | 0.56         | -1.22         | 0.06          |
| 16391         | <i>Irf9</i>   | interferon regulatory factor 9                  | -0.01        | 0.46         | 0.54          | 0.59          |
| 16371         | <i>Irx1</i>   | Iroquois related homeobox 1 (Drosophila)        | 0.23         | 0.31         | 0.02          | 0.92          |
| 16372         | <i>Irx2</i>   | Iroquois related homeobox 2 (Drosophila)        | 0.51         | 0.87         | 0.56          | 1.23          |
| 16373         | <i>Irx3</i>   | Iroquois related homeobox 3 (Drosophila)        | 0.06         | 1.03         | -0.62         | 2.50          |
| 54352         | <i>Irx5</i>   | Iroquois related homeobox 5 (Drosophila)        | -0.35        | -0.04        | -0.92         | 0.54          |
| 64379         | <i>Irx6</i>   | Iroquois related homeobox 6 (Drosophila)        | -0.25        | 0.63         | -2.25         | 2.74          |
| 104360        | <i>Isl2</i>   | insulin related protein 2 (islet 2)             | 0.73         | -0.06        | 0.21          | 0.01          |
| 71597         | <i>Isx</i>    | intestine specific homeobox                     | -0.59        | -1.16        | 0.26          | -0.11         |
| 81703         | <i>Jdp2</i>   | Jun dimerization protein 2                      | 0.93         | 0.69         | 1.95          | 0.93          |
| 16477         | <i>Junb</i>   | Jun-B oncogene                                  | -0.13        | 0.61         | 1.90          | 0.90          |
| 16478         | <i>Jund</i>   | Jun proto-oncogene related gene d               | 0.47         | 0.36         | 0.62          | 0.79          |
| 99982         | <i>Kdm1a</i>  | lysine (K)-specific demethylase 1A              | 0.12         | 0.20         | -0.15         | 0.25          |
| 194655        | <i>Klfl1</i>  | Kruppel-like factor 11                          | 1.02         | 0.35         | 0.34          | 0.44          |
| 16597         | <i>Klfl2</i>  | Kruppel-like factor 12                          | -0.65        | -0.35        | 0.36          | -0.91         |
| 66277         | <i>Klfl5</i>  | Kruppel-like factor 15                          | -0.08        | 0.12         | 0.42          | 0.46          |
| 118445        | <i>Klfl6</i>  | Kruppel-like factor 16                          | 0.09         | -0.05        | -0.43         | -0.04         |
| 75753         | <i>Klfl7</i>  | Kruppel-like factor 17                          | 0.08         | -0.38        | -0.52         | -0.82         |



| <b>geneid</b> | <b>symbol</b>  | <b>name</b>                                                                 | <b>Day 5</b> | <b>Day 8</b> | <b>Day 11</b> | <b>Day 14</b> |
|---------------|----------------|-----------------------------------------------------------------------------|--------------|--------------|---------------|---------------|
| 16600         | <i>Klf4</i>    | Kruppel-like factor 4 (gut)                                                 | 1.41         | 0.27         | 1.62          | 0.37          |
| 23849         | <i>Klf6</i>    | Kruppel-like factor 6                                                       | 0.25         | 0.59         | 1.64          | 0.65          |
| 93691         | <i>Klf7</i>    | Kruppel-like factor 7 (ubiquitous)                                          | -0.30        | 0.11         | 0.84          | -0.43         |
| 320858        | <i>L3mbtl4</i> | l(3)mbt-like 4 (Drosophila)                                                 | 0.27         | -0.87        | -0.14         | -0.11         |
| 76893         | <i>Lass2</i>   | LAG1 homolog, ceramide synthase 2                                           | -0.40        | 0.22         | 0.40          | 0.38          |
| 67260         | <i>Lass4</i>   | LAG1 homolog, ceramide synthase 4                                           | -0.46        | -0.93        | -0.15         | -0.78         |
| 71949         | <i>Lass5</i>   | LAG1 homolog, ceramide synthase 5                                           | -0.25        | 0.01         | 0.49          | 0.00          |
| 241447        | <i>Lass6</i>   | LAG1 homolog, ceramide synthase 6                                           | -0.43        | -0.07        | 0.94          | -0.30         |
| 16814         | <i>Lbx1</i>    | ladybird homeobox homolog 1 (Drosophila)                                    | 0.75         | 0.87         | 0.59          | -0.09         |
| 16815         | <i>Lbx2</i>    | ladybird homeobox homolog 2 (Drosophila)                                    | 1.02         | 0.43         | 0.44          | -0.44         |
| 212391        | <i>Lcor</i>    | ligand dependent nuclear receptor corepressor                               | 0.22         | 0.43         | 0.69          | 0.51          |
| 16869         | <i>Lhx1</i>    | LIM homeobox protein 1                                                      | -2.22        | -0.20        | 0.48          | 0.72          |
| 16870         | <i>Lhx2</i>    | LIM homeobox protein 2                                                      | 1.35         | 1.97         | -0.33         | 1.35          |
| 16871         | <i>Lhx3</i>    | LIM homeobox protein 3                                                      | -1.15        | -0.39        | -3.28         | -0.45         |
| 16872         | <i>Lhx4</i>    | LIM homeobox protein 4                                                      | -0.24        | -0.84        | -0.03         | -0.32         |
| 16873         | <i>Lhx5</i>    | LIM homeobox protein 5                                                      | -0.27        | -0.57        | 0.35          | -0.67         |
| 16874         | <i>Lhx6</i>    | LIM homeobox protein 6                                                      | -0.08        | 0.33         | 0.38          | -0.01         |
| 16875         | <i>Lhx8</i>    | LIM homeobox protein 8                                                      | -0.24        | 0.21         | -1.66         | -0.11         |
| 16876         | <i>Lhx9</i>    | LIM homeobox protein 9                                                      | 1.39         | 1.33         | -1.41         | -0.10         |
| 110648        | <i>Lmx1a</i>   | LIM homeobox transcription factor 1 alpha                                   | -0.10        | 0.19         | -1.00         | 0.28          |
| 16917         | <i>Lmx1b</i>   | LIM homeobox transcription factor 1 beta                                    | 1.33         | 0.44         | -0.59         | 1.27          |
| 17132         | <i>Maf</i>     | avian musculoaponeurotic fibrosarcoma (v-maf)<br>AS42 oncogene homolog      | 0.30         | 0.45         | 1.08          | 0.37          |
| 378435        | <i>Mafa</i>    | v-maf musculoaponeurotic fibrosarcoma oncogene<br>family, protein A (avian) | 0.93         | 0.54         | -0.25         | 0.81          |
| 16658         | <i>Mafb</i>    | v-maf musculoaponeurotic fibrosarcoma oncogene<br>family, protein B (avian) | 0.34         | 0.37         | -0.98         | -0.48         |
| 17133         | <i>Maff</i>    | v-maf musculoaponeurotic fibrosarcoma oncogene<br>family, protein F (avian) | -0.19        | 0.35         | 0.70          | -0.31         |
| 17134         | <i>Mafg</i>    | v-maf musculoaponeurotic fibrosarcoma oncogene<br>family, protein G (avian) | 0.06         | 0.01         | -0.23         | -0.06         |
| 17135         | <i>Mafk</i>    | v-maf musculoaponeurotic fibrosarcoma oncogene<br>family, protein K (avian) | 0.13         | 0.46         | 0.87          | 0.22          |
| 17187         | <i>Max</i>     | Max protein                                                                 | -0.05        | 0.07         | -0.14         | -0.06         |
| 14013         | <i>Mecom</i>   | MDS1 and EVI1 complex locus                                                 | -0.65        | -0.68        | 0.09          | 0.16          |
| 17257         | <i>Mecp2</i>   | methyl CpG binding protein 2                                                | 0.04         | 0.03         | 0.34          | 0.22          |
| 17258         | <i>Mef2a</i>   | myocyte enhancer factor 2A                                                  | 0.09         | 0.07         | 0.87          | 0.07          |
| 17259         | <i>Mef2b</i>   | myocyte enhancer factor 2B                                                  | 0.69         | 0.14         | -0.08         | -0.26         |
| 17261         | <i>Mef2d</i>   | myocyte enhancer factor 2D                                                  | 0.16         | 0.60         | 1.09          | 0.66          |
| 17536         | <i>Meis2</i>   | Meis homeobox 2                                                             | -0.51        | 0.46         | 1.59          | 0.98          |
| 17537         | <i>Meis3</i>   | Meis homeobox 3                                                             | -0.16        | 0.11         | 1.85          | 0.73          |
| 17285         | <i>Meox1</i>   | mesenchyme homeobox 1                                                       | -0.05        | 0.52         | 0.80          | 0.14          |
| 17286         | <i>Meox2</i>   | mesenchyme homeobox 2                                                       | -0.59        | 0.08         | -0.92         | -0.07         |

| <b>geneid</b> | <b>symbol</b>  | <b>name</b>                                                                     | <b>Day 5</b> | <b>Day 8</b> | <b>Day 11</b> | <b>Day 14</b> |
|---------------|----------------|---------------------------------------------------------------------------------|--------------|--------------|---------------|---------------|
| 29808         | <i>Mga</i>     | MAX gene associated                                                             | 0.02         | -0.04        | -0.04         | -0.20         |
| 17342         | <i>Mitf</i>    | microphthalmia-associated transcription factor                                  | 0.35         | 0.38         | 1.00          | 0.80          |
| 27217         | <i>Mixl1</i>   | Mix1 homeobox-like 1 ( <i>Xenopus laevis</i> )                                  | -2.07        | 0.00         | -1.43         | 0.19          |
| 210719        | <i>Mkx</i>     | mohawk homeobox                                                                 | -0.37        | 0.20         | -0.48         | 0.18          |
| 17428         | <i>Mnt</i>     | max binding protein                                                             | 0.16         | 0.40         | -0.01         | 0.16          |
| 15285         | <i>Mnx1</i>    | motor neuron and pancreas homeobox 1                                            | 0.23         | -0.62        | -0.64         | 1.23          |
| 67871         | <i>Mrrf</i>    | mitochondrial ribosome recycling factor                                         | 0.28         | 0.05         | -0.31         | -0.35         |
| 17702         | <i>Msx2</i>    | homeobox, msh-like 2                                                            | 0.46         | -0.16        | 2.86          | 0.47          |
| 17703         | <i>Msx3</i>    | homeobox, msh-like 3                                                            | -0.62        | -0.12        | -1.41         | -1.32         |
| 116870        | <i>Mta1</i>    | metastasis associated 1                                                         | -0.22        | 0.02         | -0.48         | -0.01         |
| 23942         | <i>Mta2</i>    | metastasis-associated gene family, member 2                                     | -0.07        | 0.03         | -0.07         | -0.03         |
| 116871        | <i>Mta3</i>    | metastasis associated 3                                                         | 0.40         | 0.29         | -0.29         | 0.32          |
| 17764         | <i>Mtfl</i>    | metal response element binding transcription factor 1                           | 0.10         | 0.39         | 0.30          | 0.30          |
| 17863         | <i>Myb</i>     | myeloblastosis oncogene                                                         | -0.84        | -1.03        | -1.53         | -1.31         |
| 16918         | <i>Mycl1</i>   | v-myc myelocytomatosis viral oncogene homolog 1, lung carcinoma derived (avian) | -0.36        | -0.38        | -0.90         | -0.07         |
| 17870         | <i>Mycs</i>    | myc-like oncogene, s-myc protein                                                | 0.81         | 0.44         | -0.14         | -0.07         |
| 17927         | <i>Myod1</i>   | myogenic differentiation 1                                                      | -1.22        | -0.75        | -2.53         | -1.11         |
| 17928         | <i>Myog</i>    | myogenin                                                                        | 0.59         | 1.53         | -0.54         | 1.19          |
| 232934        | <i>Mypop</i>   | Myb-related transcription factor, partner of profilin                           | -0.30        | 0.36         | -0.62         | 0.43          |
| 217127        | <i>Myst2</i>   | MYST histone acetyltransferase 2                                                | 0.40         | 0.36         | -0.05         | 0.23          |
| 17932         | <i>Myt1</i>    | myelin transcription factor 1                                                   | -0.08        | 0.21         | 0.57          | 1.40          |
| 17933         | <i>Myt1l</i>   | myelin transcription factor 1-like                                              | -1.49        | 0.49         | -1.41         | -0.35         |
| 20185         | <i>Ncor1</i>   | nuclear receptor co-repressor 1                                                 | -0.12        | 0.10         | -0.18         | 0.05          |
| 18012         | <i>Neurod1</i> | neurogenic differentiation 1                                                    | -0.39        | -1.40        | -2.37         | -2.14         |
| 11925         | <i>Neurog3</i> | neurogenin 3                                                                    | 0.79         | -1.56        | -2.91         | -2.83         |
| 54446         | <i>Nfat5</i>   | nuclear factor of activated T-cells 5                                           | -0.27        | -0.02        | 0.64          | 0.04          |
| 18018         | <i>Nfatc1</i>  | nuclear factor of activated T-cells, cytoplasmic, calcineurin-dependent 1       | 0.45         | 0.41         | 0.62          | 0.60          |
| 18019         | <i>Nfatc2</i>  | nuclear factor of activated T-cells, cytoplasmic, calcineurin-dependent 2       | -0.05        | 0.28         | 1.20          | 0.48          |
| 18021         | <i>Nfatc3</i>  | nuclear factor of activated T-cells, cytoplasmic, calcineurin-dependent 3       | 0.01         | 0.26         | -0.11         | 0.08          |
| 73181         | <i>Nfatc4</i>  | nuclear factor of activated T-cells, cytoplasmic, calcineurin-dependent 4       | -0.02        | 0.05         | 0.35          | 0.46          |
| 18022         | <i>Nfe2</i>    | nuclear factor, erythroid derived 2                                             | -0.31        | 0.55         | 0.47          | -0.32         |
| 18023         | <i>Nfe2l1</i>  | nuclear factor, erythroid derived 2,-like 1                                     | -0.25        | 0.07         | 0.26          | 0.04          |
| 18024         | <i>Nfe2l2</i>  | nuclear factor, erythroid derived 2, like 2                                     | 0.24         | 0.12         | -0.24         | 0.16          |
| 18025         | <i>Nfe2l3</i>  | nuclear factor, erythroid derived 2, like 3                                     | -0.59        | 0.19         | -0.28         | 0.59          |
| 18027         | <i>Nfia</i>    | nuclear factor I/A                                                              | 0.53         | 0.32         | 0.05          | 0.47          |
| 18028         | <i>Nfib</i>    | nuclear factor I/B                                                              | 0.05         | -0.31        | 0.13          | -0.27         |
| 18029         | <i>Nfic</i>    | nuclear factor I/C                                                              | 0.26         | 0.11         | 0.19          | 0.18          |

| <b>geneid</b> | <b>symbol</b> | <b>name</b>                                                                    | <b>Day 5</b> | <b>Day 8</b> | <b>Day 11</b> | <b>Day 14</b> |
|---------------|---------------|--------------------------------------------------------------------------------|--------------|--------------|---------------|---------------|
| 18030         | <i>Nfil3</i>  | nuclear factor, interleukin 3, regulated                                       | 0.13         | 0.23         | 0.50          | 0.19          |
| 18032         | <i>Nfix</i>   | nuclear factor I/X                                                             | 0.73         | 0.74         | 0.24          | 0.43          |
| 18033         | <i>Nfkb1</i>  | nuclear factor of kappa light polypeptide gene enhancer in B-cells 1, p105     | 0.16         | 0.14         | 0.70          | 0.27          |
| 18034         | <i>Nfkb2</i>  | nuclear factor of kappa light polypeptide gene enhancer in B-cells 2, p49/p100 | -0.03        | -0.05        | 1.34          | -0.05         |
| 74164         | <i>Nfx1</i>   | nuclear transcription factor, X-box binding 1                                  | -0.13        | 0.01         | -0.43         | -0.14         |
| 18044         | <i>Nfya</i>   | nuclear transcription factor-Y alpha                                           | 0.06         | 0.33         | -0.08         | 0.20          |
| 18045         | <i>Nfyb</i>   | nuclear transcription factor-Y beta                                            | 0.19         | -0.18        | -0.48         | -0.23         |
| 18046         | <i>Nfyc</i>   | nuclear transcription factor-Y gamma                                           | 0.06         | 0.00         | -0.59         | -0.16         |
| 20231         | <i>Nkx1-2</i> | NK1 transcription factor related, locus 2 (Drosophila)                         | -3.89        | 0.05         | -1.63         | -0.40         |
| 21869         | <i>Nkx2-1</i> | NK2 homeobox 1                                                                 | -0.29        | -0.62        | 0.66          | -0.56         |
| 18088         | <i>Nkx2-2</i> | NK2 transcription factor related, locus 2 (Drosophila)                         | -0.14        | 0.18         | 0.57          | -0.50         |
| 18089         | <i>Nkx2-3</i> | NK2 transcription factor related, locus 3 (Drosophila)                         | -1.00        | 0.32         | -0.43         | 1.67          |
| 228731        | <i>Nkx2-4</i> | NK2 transcription factor related, locus 4 (Drosophila)                         | -0.09        | 0.55         | -1.61         | 0.81          |
| 18094         | <i>Nkx2-9</i> | NK2 transcription factor related, locus 9 (Drosophila)                         | 0.67         | -0.50        | 1.11          | -1.01         |
| 18095         | <i>Nkx3-1</i> | NK-3 transcription factor, locus 1 (Drosophila)                                | -0.18        | 0.81         | -0.50         | 0.54          |
| 12020         | <i>Nkx3-2</i> | NK3 homeobox 2                                                                 | 1.39         | 0.44         | -0.25         | -0.71         |
| 18096         | <i>Nkx6-1</i> | NK6 homeobox 1                                                                 | 0.80         | 0.75         | -0.05         | 0.54          |
| 14912         | <i>Nkx6-2</i> | NK6 homeobox 2                                                                 | 0.28         | -0.21        | 0.30          | -0.04         |
| 74561         | <i>Nkx6-3</i> | NK6 homeobox 3                                                                 | 0.16         | 0.99         | 1.18          | 0.07          |
| 18291         | <i>Nobox</i>  | NOBOX oogenesis homeobox                                                       | -0.20        | -0.23        | -0.06         | -0.03         |
| 70769         | <i>Nolc1</i>  | nucleolar and coiled-body phosphoprotein 1                                     | -0.20        | -0.32        | -0.85         | -0.55         |
| 18128         | <i>Notch1</i> | Notch gene homolog 1 (Drosophila)                                              | 0.01         | -0.65        | 0.21          | -0.19         |
| 384452        | <i>Noto</i>   | notochord homolog (Xenopus laevis)                                             | -0.53        | -0.41        | -0.14         | 0.50          |
| 18143         | <i>Npas2</i>  | neuronal PAS domain protein 2                                                  | 0.04         | -0.08        | 0.49          | 0.68          |
| 244879        | <i>Npat</i>   | nuclear protein in the AT region                                               | 0.13         | 0.14         | 0.21          | 0.15          |
| 11614         | <i>Nr0b1</i>  | nuclear receptor subfamily 0, group B, member 1                                | 1.13         | 0.04         | 0.83          | 0.08          |
| 23957         | <i>Nr0b2</i>  | nuclear receptor subfamily 0, group B, member 2                                | 0.16         | 1.18         | -0.62         | 0.12          |
| 217166        | <i>Nr1d1</i>  | nuclear receptor subfamily 1, group D, member 1                                | 0.28         | 0.18         | -0.35         | 0.20          |
| 353187        | <i>Nr1d2</i>  | nuclear receptor subfamily 1, group D, member 2                                | 0.28         | 0.06         | -0.16         | -0.21         |
| 22260         | <i>Nr1h2</i>  | nuclear receptor subfamily 1, group H, member 2                                | -0.02        | 0.08         | -0.11         | 0.06          |
| 22259         | <i>Nr1h3</i>  | nuclear receptor subfamily 1, group H, member 3                                | -0.41        | -0.15        | 0.23          | -0.05         |
| 20186         | <i>Nr1h4</i>  | nuclear receptor subfamily 1, group H, member 4                                | -0.22        | -0.13        | 0.50          | -0.11         |
| 18171         | <i>Nr1i2</i>  | nuclear receptor subfamily 1, group I, member 2                                | -0.53        | 2.19         | 0.50          | 2.65          |
| 12355         | <i>Nr1i3</i>  | nuclear receptor subfamily 1, group I, member 3                                | -0.53        | -0.87        | -0.51         | -0.59         |
| 22025         | <i>Nr2c1</i>  | nuclear receptor subfamily 2, group C, member 1                                | -0.35        | -0.22        | 0.23          | 0.18          |
| 22026         | <i>Nr2c2</i>  | nuclear receptor subfamily 2, group C, member 2                                | -0.10        | 0.02         | -0.03         | -0.13         |
| 21907         | <i>Nr2e1</i>  | nuclear receptor subfamily 2, group E, member 1                                | 0.18         | 0.83         | -0.54         | -1.44         |

| <b>geneid</b> | <b>symbol</b>  | <b>name</b>                                     | <b>Day 5</b> | <b>Day 8</b> | <b>Day 11</b> | <b>Day 14</b> |
|---------------|----------------|-------------------------------------------------|--------------|--------------|---------------|---------------|
| 23958         | <i>Nr2e3</i>   | nuclear receptor subfamily 2, group E, member 3 | 0.41         | 0.98         | 0.57          | -0.11         |
| 13865         | <i>Nr2f1</i>   | nuclear receptor subfamily 2, group F, member 1 | -0.20        | 0.20         | 1.39          | 0.99          |
| 13864         | <i>Nr2f6</i>   | nuclear receptor subfamily 2, group F, member 6 | -0.19        | -0.07        | -0.21         | 0.24          |
| 14815         | <i>Nr3c1</i>   | nuclear receptor subfamily 3, group C, member 1 | 0.12         | 0.18         | 0.00          | 0.28          |
| 110784        | <i>Nr3c2</i>   | nuclear receptor subfamily 3, group C, member 2 | 0.59         | 1.33         | 0.72          | 0.90          |
| 18227         | <i>Nr4a2</i>   | nuclear receptor subfamily 4, group A, member 2 | -0.09        | 0.38         | 0.55          | 0.46          |
| 18124         | <i>Nr4a3</i>   | nuclear receptor subfamily 4, group A, member 3 | 0.76         | 1.22         | 1.35          | 1.63          |
| 14536         | <i>Nr6a1</i>   | nuclear receptor subfamily 6, group A, member 1 | -0.01        | 0.23         | -0.36         | 0.09          |
| 18181         | <i>Nrf1</i>    | nuclear respiratory factor 1                    | -0.06        | 0.07         | -0.26         | -0.10         |
| 18185         | <i>Nrl</i>     | neural retina leucine zipper gene               | 0.81         | 0.66         | -0.03         | -0.44         |
| 50914         | <i>Olig1</i>   | oligodendrocyte transcription factor 1          | -0.58        | 0.08         | 0.41          | 0.29          |
| 50913         | <i>Olig2</i>   | oligodendrocyte transcription factor 2          | -0.89        | -0.52        | -0.62         | -0.25         |
| 15379         | <i>Onecut1</i> | one cut domain, family member 1                 | 0.22         | 0.92         | -1.22         | 1.67          |
| 225631        | <i>Onecut2</i> | one cut domain, family member 2                 | -0.37        | 0.10         | 0.78          | 0.52          |
| 246086        | <i>Onecut3</i> | one cut domain, family member 3                 | 0.34         | 1.06         | -0.29         | -0.02         |
| 18420         | <i>Otp</i>     | orthopedia homolog (Drosophila)                 | 0.27         | 0.29         | -0.03         | -0.68         |
| 18423         | <i>Otx1</i>    | orthodenticle homolog 1 (Drosophila)            | -0.01        | 0.93         | -0.86         | 0.72          |
| 18424         | <i>Otx2</i>    | orthodenticle homolog 2 (Drosophila)            | -1.66        | -1.32        | -2.17         | -1.83         |
| 18426         | <i>Ovol1</i>   | OVO homolog-like 1 (Drosophila)                 | 0.13         | 0.37         | -0.67         | 0.69          |
| 107586        | <i>Ovol2</i>   | ovo-like 2 (Drosophila)                         | -0.04        | -0.09        | -0.96         | 0.34          |
| 18813         | <i>Pa2g4</i>   | proliferation-associated 2G4                    | -0.18        | -0.24        | -0.73         | -0.43         |
| 18503         | <i>Pax1</i>    | paired box gene 1                               | 0.02         | -0.44        | -1.47         | -1.20         |
| 18504         | <i>Pax2</i>    | paired box gene 2                               | 0.20         | 0.82         | -0.82         | 0.25          |
| 18506         | <i>Pax4</i>    | paired box gene 4                               | 0.41         | 0.44         | -0.14         | -0.11         |
| 18507         | <i>Pax5</i>    | paired box gene 5                               | -0.13        | 1.18         | 0.34          | -0.71         |
| 18509         | <i>Pax7</i>    | paired box gene 7                               | -0.13        | -0.38        | -1.05         | -0.11         |
| 18510         | <i>Pax8</i>    | paired box gene 8                               | -0.76        | -0.24        | -2.09         | -1.39         |
| 18511         | <i>Pax9</i>    | paired box gene 9                               | 0.03         | -0.47        | 0.32          | 0.97          |
| 18514         | <i>Pbx1</i>    | pre B-cell leukemia transcription factor 1      | -0.48        | 0.60         | -0.69         | 1.06          |
| 18515         | <i>Pbx2</i>    | pre B-cell leukemia transcription factor 2      | 0.08         | 0.22         | 0.08          | 0.57          |
| 18516         | <i>Pbx3</i>    | pre B-cell leukemia transcription factor 3      | -0.22        | 0.14         | -0.91         | 0.12          |
| 80720         | <i>Pbx4</i>    | pre-B-cell leukemia homeobox 4                  | 0.06         | -0.27        | 0.31          | 0.06          |
| 71041         | <i>Pcgf6</i>   | polycomb group ring finger 6                    | -0.03        | -0.26        | -0.73         | -0.41         |
| 18609         | <i>Pdx1</i>    | pancreatic and duodenal homeobox 1              | -0.22        | -0.14        | 0.74          | -0.36         |
| 18667         | <i>Pgr</i>     | progesterone receptor                           | -1.08        | -0.25        | -1.63         | -1.09         |
| 68479         | <i>Phf5a</i>   | PHD finger protein 5A                           | -0.24        | -0.34        | -0.71         | -0.53         |
| 11859         | <i>Phox2a</i>  | paired-like homeobox 2a                         | 0.24         | -0.02        | -0.42         | -0.08         |
| 18935         | <i>Phox2b</i>  | paired-like homeobox 2b                         | 0.41         | 1.44         | -0.52         | 1.23          |
| 18740         | <i>Pitx1</i>   | paired-like homeodomain transcription factor 1  | 1.15         | 0.56         | 1.15          | 1.21          |
| 18742         | <i>Pitx3</i>   | paired-like homeodomain transcription factor 3  | -0.40        | 0.41         | -1.18         | 0.53          |

| <b>geneid</b> | <b>symbol</b>  | <b>name</b>                                                                 | <b>Day 5</b> | <b>Day 8</b> | <b>Day 11</b> | <b>Day 14</b> |
|---------------|----------------|-----------------------------------------------------------------------------|--------------|--------------|---------------|---------------|
| 18771         | <i>Pknox1</i>  | Pbx/knotted 1 homeobox                                                      | 0.12         | 0.30         | -0.31         | -0.09         |
| 208076        | <i>Pknox2</i>  | Pbx/knotted 1 homeobox 2                                                    | 0.19         | -0.19        | 1.53          | 0.97          |
| 18736         | <i>Pou1f1</i>  | POU domain, class 1, transcription factor 1                                 | 0.78         | -0.14        | 1.15          | -0.08         |
| 18986         | <i>Pou2f1</i>  | POU domain, class 2, transcription factor 1                                 | -0.43        | -0.27        | -0.46         | -0.74         |
| 18987         | <i>Pou2f2</i>  | POU domain, class 2, transcription factor 2                                 | -0.98        | -0.61        | -0.89         | -0.99         |
| 18988         | <i>Pou2f3</i>  | POU domain, class 2, transcription factor 3                                 | -0.98        | 0.45         | 0.52          | -0.01         |
| 18991         | <i>Pou3f1</i>  | POU domain, class 3, transcription factor 1                                 | -1.45        | -1.66        | -3.59         | -2.10         |
| 18992         | <i>Pou3f2</i>  | POU domain, class 3, transcription factor 2                                 | -0.24        | 0.20         | -0.37         | -0.21         |
| 18993         | <i>Pou3f3</i>  | POU domain, class 3, transcription factor 3                                 | 0.64         | 0.38         | -0.26         | 0.82          |
| 18994         | <i>Pou3f4</i>  | POU domain, class 3, transcription factor 4                                 | -0.68        | -1.22        | -0.40         | 0.91          |
| 18996         | <i>Pou4f1</i>  | POU domain, class 4, transcription factor 1                                 | 0.65         | 0.59         | 0.29          | 0.36          |
| 18997         | <i>Pou4f2</i>  | POU domain, class 4, transcription factor 2                                 | -1.55        | -1.38        | -0.35         | -1.15         |
| 18998         | <i>Pou4f3</i>  | POU domain, class 4, transcription factor 3                                 | -0.52        | -1.46        | -2.17         | -0.76         |
| 75507         | <i>Pou5f2</i>  | POU domain class 5, transcription factor 2                                  | -0.81        | -0.51        | 0.86          | -0.52         |
| 19009         | <i>Pou6f1</i>  | POU domain, class 6, transcription factor 1                                 | -0.32        | 0.11         | 0.30          | 0.31          |
| 218030        | <i>Pou6f2</i>  | POU domain, class 6, transcription factor 2                                 | -0.59        | 1.07         | -0.73         | -0.86         |
| 19013         | <i>Ppara</i>   | peroxisome proliferator activated receptor alpha                            | 0.12         | -0.09        | 1.19          | 0.56          |
| 19015         | <i>Ppard</i>   | peroxisome proliferator activator receptor delta                            | 0.21         | 0.50         | 0.27          | 0.67          |
| 19016         | <i>Pparg</i>   | peroxisome proliferator activated receptor gamma                            | 0.64         | 2.10         | 1.33          | 2.85          |
| 50907         | <i>Preb</i>    | prolactin regulatory element binding                                        | -0.03        | 0.07         | -0.11         | 0.31          |
| 19127         | <i>Prop1</i>   | paired like homeodomain factor 1                                            | 0.41         | -0.14        | -0.14         | -0.11         |
| 20204         | <i>Prrx2</i>   | paired related homeobox 2                                                   | 0.49         | 0.61         | 2.37          | 1.20          |
| 107751        | <i>Prrx1l</i>  | paired related homeobox protein-like 1                                      | -0.89        | 0.44         | -0.14         | -0.71         |
| 19290         | <i>Pura</i>    | purine rich element binding protein A                                       | 0.44         | 0.14         | 0.31          | -0.02         |
| 19291         | <i>Purb</i>    | purine rich element binding protein B                                       | -0.42        | -0.20        | -0.10         | -0.36         |
| 19401         | <i>Rara</i>    | retinoic acid receptor, alpha                                               | 0.06         | -0.15        | -0.79         | -0.16         |
| 19434         | <i>Rax</i>     | retina and anterior neural fold homeobox                                    | 0.13         | 0.10         | -0.28         | 0.52          |
| 19668         | <i>Rbpjl</i>   | recombination signal binding protein for immunoglobulin kappa J region-like | 0.15         | -0.82        | 0.56          | -0.08         |
| 104383        | <i>Rcor2</i>   | REST corepressor 2                                                          | 0.11         | -0.14        | -0.32         | -0.01         |
| 19696         | <i>Rel</i>     | reticuloendotheliosis oncogene                                              | -0.25        | 0.61         | 0.33          | 0.47          |
| 19698         | <i>Relb</i>    | avian reticuloendotheliosis viral (v-rel) oncogene related B                | 0.41         | 0.00         | 1.28          | 0.02          |
| 68703         | <i>Rere</i>    | arginine glutamic acid dipeptide (RE) repeats                               | -0.07        | 0.30         | 0.10          | 0.31          |
| 19883         | <i>Rora</i>    | RAR-related orphan receptor alpha                                           | 0.49         | 0.66         | 0.14          | 0.38          |
| 225998        | <i>Rorb</i>    | RAR-related orphan receptor beta                                            | -0.22        | 0.44         | 0.53          | -0.23         |
| 19885         | <i>Rorc</i>    | RAR-related orphan receptor gamma                                           | -1.17        | 0.27         | -2.33         | -1.80         |
| 12395         | <i>Runx1t1</i> | runt-related transcription factor 1; translocated to, 1 (cyclin D-related)  | -0.86        | -0.15        | -1.37         | -0.81         |
| 12399         | <i>Runx3</i>   | runt related transcription factor 3                                         | -0.23        | 0.30         | -0.05         | -0.26         |
| 20181         | <i>Rxra</i>    | retinoid X receptor alpha                                                   | 0.27         | 0.62         | 0.45          | 1.06          |
| 20182         | <i>Rxrb</i>    | retinoid X receptor beta                                                    | 0.05         | 0.17         | -0.24         | 0.12          |

| <b>geneid</b> | <b>symbol</b>  | <b>name</b>                                                     | <b>Day 5</b> | <b>Day 8</b> | <b>Day 11</b> | <b>Day 14</b> |
|---------------|----------------|-----------------------------------------------------------------|--------------|--------------|---------------|---------------|
| 20183         | <i>Rxrg</i>    | retinoid X receptor gamma                                       | -2.15        | -0.77        | -3.11         | -2.01         |
| 20230         | <i>Satb1</i>   | special AT-rich sequence binding protein 1                      | -0.76        | 0.06         | -2.09         | -0.10         |
| 212712        | <i>Satb2</i>   | special AT-rich sequence binding protein 2                      | 0.71         | 0.49         | 0.56          | 0.37          |
| 18292         | <i>Sebox</i>   | SEBOX homeobox                                                  | -0.71        | -1.37        | -0.59         | -1.52         |
| 20375         | <i>Sfpi1</i>   | SFFV proviral integration 1                                     | -0.02        | 0.95         | 0.15          | 0.82          |
| 20464         | <i>Sim1</i>    | single-minded homolog 1 (Drosophila)                            | -0.45        | 0.24         | -0.35         | -0.61         |
| 20465         | <i>Sim2</i>    | single-minded homolog 2 (Drosophila)                            | 0.15         | 0.92         | 1.65          | 1.07          |
| 20466         | <i>Sin3a</i>   | transcriptional regulator, SIN3A (yeast)                        | -0.02        | 0.07         | -0.41         | 0.01          |
| 20471         | <i>Six1</i>    | sine oculis-related homeobox 1 homolog (Drosophila)             | 0.42         | 0.07         | -0.49         | 0.16          |
| 20472         | <i>Six2</i>    | sine oculis-related homeobox 2 homolog (Drosophila)             | 0.00         | -0.12        | 0.09          | -0.10         |
| 20473         | <i>Six3</i>    | sine oculis-related homeobox 3 homolog (Drosophila)             | 0.20         | 0.70         | 0.38          | -0.62         |
| 20474         | <i>Six4</i>    | sine oculis-related homeobox 4 homolog (Drosophila)             | 0.07         | -0.24        | -0.59         | -0.37         |
| 20475         | <i>Six5</i>    | sine oculis-related homeobox 5 homolog (Drosophila)             | -0.36        | 0.33         | 0.97          | 0.99          |
| 20476         | <i>Six6</i>    | sine oculis-related homeobox 6 homolog (Drosophila)             | -1.18        | 0.75         | -1.25         | -1.15         |
| 17125         | <i>Smad1</i>   | MAD homolog 1 (Drosophila)                                      | 0.18         | 0.16         | 0.37          | 0.17          |
| 17126         | <i>Smad2</i>   | MAD homolog 2 (Drosophila)                                      | 0.26         | 0.21         | 0.14          | 0.14          |
| 17129         | <i>Smad5</i>   | MAD homolog 5 (Drosophila)                                      | -0.29        | 0.17         | 0.31          | 0.45          |
| 17130         | <i>Smad6</i>   | MAD homolog 6 (Drosophila)                                      | 0.56         | 0.58         | -0.04         | 1.41          |
| 17131         | <i>Smad7</i>   | MAD homolog 7 (Drosophila)                                      | 0.03         | 0.04         | 0.15          | -0.06         |
| 55994         | <i>Smad9</i>   | MAD homolog 9 (Drosophila)                                      | -0.72        | 0.29         | 0.29          | 0.19          |
| 30927         | <i>Snai3</i>   | snail homolog 3 (Drosophila)                                    | -0.18        | 0.01         | 0.07          | 0.46          |
| 227631        | <i>Sohlh1</i>  | spermatogenesis and oogenesis specific basic helix-loop-helix 1 | 0.70         | 1.22         | -0.69         | 0.86          |
| 20666         | <i>Sox11</i>   | SRY-box containing gene 11                                      | -0.37        | -0.67        | -0.35         | -0.47         |
| 223227        | <i>Sox21</i>   | SRY-box containing gene 21                                      | 1.43         | -0.13        | 0.48          | 0.30          |
| 20683         | <i>Sp1</i>     | trans-acting transcription factor 1                             | -0.06        | -0.03        | -0.37         | -0.30         |
| 20687         | <i>Sp3</i>     | trans-acting transcription factor 3                             | 0.20         | 0.36         | -0.12         | 0.29          |
| 20688         | <i>Sp4</i>     | trans-acting transcription factor 4                             | -0.10        | 0.31         | -0.57         | -0.01         |
| 30051         | <i>Spdef</i>   | SAM pointed domain containing ets transcription factor          | 0.69         | 0.22         | -0.55         | -0.11         |
| 56381         | <i>Spn</i>     | SPEN homolog, transcriptional regulator (Drosophila)            | -0.12        | 0.26         | 0.19          | 0.11          |
| 272382        | <i>Spib</i>    | Spi-B transcription factor (Spi-1/PU.1 related)                 | 0.50         | -0.05        | -0.12         | -0.44         |
| 20728         | <i>Spic</i>    | Spi-C transcription factor (Spi-1/PU.1 related)                 | -0.34        | 0.71         | 1.56          | 0.59          |
| 79401         | <i>Spz1</i>    | spermatogenic leucine zipper 1                                  | 1.41         | 1.88         | -0.06         | 0.45          |
| 20787         | <i>Srebfl1</i> | sterol regulatory element binding transcription factor 1        | -0.38        | 0.30         | 0.31          | 0.29          |
| 20788         | <i>Srebfl2</i> | sterol regulatory element binding factor 2                      | -0.37        | 0.02         | -0.18         | -0.08         |
| 20807         | <i>Srf</i>     | serum response factor                                           | -0.18        | -0.09        | 0.12          | -0.22         |

| <b>geneid</b> | <b>symbol</b>  | <b>name</b>                                                              | <b>Day 5</b> | <b>Day 8</b> | <b>Day 11</b> | <b>Day 14</b> |
|---------------|----------------|--------------------------------------------------------------------------|--------------|--------------|---------------|---------------|
| 269397        | <i>Ss18l1</i>  | synovial sarcoma translocation gene on chromosome 18-like 1              | 0.37         | 0.18         | 0.49          | 0.15          |
| 240690        | <i>St18</i>    | suppression of tumorigenicity 18                                         | 0.81         | 0.33         | -0.41         | -0.37         |
| 20846         | <i>Stat1</i>   | signal transducer and activator of transcription 1                       | -0.18        | 0.50         | 0.45          | 0.88          |
| 20847         | <i>Stat2</i>   | signal transducer and activator of transcription 2                       | 0.11         | 0.67         | 0.12          | 0.84          |
| 20849         | <i>Stat4</i>   | signal transducer and activator of transcription 4                       | -0.72        | 0.00         | -0.34         | -0.35         |
| 20851         | <i>Stat5b</i>  | signal transducer and activator of transcription 5B                      | 0.30         | 0.43         | 1.37          | 0.67          |
| 20852         | <i>Stat6</i>   | signal transducer and activator of transcription 6                       | 0.30         | 0.31         | 0.30          | 0.41          |
| 94186         | <i>Strn3</i>   | striatin, calmodulin binding protein 3                                   | -0.08        | -0.09        | 0.17          | -0.08         |
| 226182        | <i>Taf5</i>    | TAF5 RNA polymerase II, TATA box binding protein (TBP)-associated factor | 0.10         | 0.03         | -0.35         | -0.07         |
| 21343         | <i>Taf6</i>    | TAF6 RNA polymerase II, TATA box binding protein (TBP)-associated factor | 0.04         | 0.09         | -0.17         | 0.04          |
| 21374         | <i>Tbp</i>     | TATA box binding protein                                                 | -0.11        | 0.10         | -0.35         | 0.09          |
| 227606        | <i>Tbpl2</i>   | TATA box binding protein like 2                                          | 0.41         | -0.14        | -0.14         | -0.11         |
| 21375         | <i>Tbr1</i>    | T-box brain gene 1                                                       | 0.07         | 0.15         | 0.41          | -0.70         |
| 109575        | <i>Tbx10</i>   | T-box 10                                                                 | 1.13         | 1.43         | -1.07         | 1.58          |
| 21384         | <i>Tbx15</i>   | T-box 15                                                                 | 0.59         | 0.10         | 1.03          | 0.64          |
| 83993         | <i>Tbx19</i>   | T-box 19                                                                 | 1.00         | -1.12        | -0.14         | 0.50          |
| 57765         | <i>Tbx21</i>   | T-box 21                                                                 | -0.82        | 0.09         | -0.78         | 0.45          |
| 245572        | <i>Tbx22</i>   | T-box 22                                                                 | -1.52        | -0.65        | -1.75         | -0.10         |
| 21387         | <i>Tbx4</i>    | T-box 4                                                                  | 0.27         | 0.53         | -0.97         | 0.23          |
| 21389         | <i>Tbx6</i>    | T-box 6                                                                  | 0.39         | 0.43         | 0.02          | -0.10         |
| 56070         | <i>Tcerg1</i>  | transcription elongation regulator 1 (CA150)                             | -0.03        | -0.03        | -0.40         | -0.04         |
| 21406         | <i>Tcf12</i>   | transcription factor 12                                                  | -0.07        | 0.13         | 0.30          | 0.16          |
| 21411         | <i>Tcf20</i>   | transcription factor 20                                                  | 0.12         | 0.39         | 0.12          | 0.33          |
| 21412         | <i>Tcf21</i>   | transcription factor 21                                                  | 0.16         | 2.21         | -0.78         | -0.54         |
| 66855         | <i>Tcf25</i>   | transcription factor 25 (basic helix-loop-helix)                         | -0.04        | 0.06         | 0.00          | 0.08          |
| 21423         | <i>Tcf3</i>    | transcription factor 3                                                   | 0.00         | 0.05         | -0.33         | 0.11          |
| 21413         | <i>Tcf4</i>    | transcription factor 4                                                   | -0.50        | 0.19         | -0.12         | -0.08         |
| 21418         | <i>Tcfap2a</i> | transcription factor AP-2, alpha                                         | -0.09        | -0.07        | 0.59          | 0.13          |
| 21419         | <i>Tcfap2b</i> | transcription factor AP-2 beta                                           | -0.15        | 0.20         | 0.40          | 0.05          |
| 21420         | <i>Tcfap2c</i> | transcription factor AP-2, gamma                                         | 1.19         | 1.07         | 1.24          | 1.48          |
| 226896        | <i>Tcfap2d</i> | transcription factor AP-2, delta                                         | 0.41         | -0.14        | -0.66         | -0.11         |
| 332937        | <i>Tcfap2e</i> | transcription factor AP-2, epsilon                                       | -0.32        | 0.02         | -0.94         | 0.18          |
| 209446        | <i>Tcfe3</i>   | transcription factor E3                                                  | -0.09        | -0.13        | -0.74         | -0.40         |
| 21425         | <i>Tcfefb</i>  | transcription factor EB                                                  | 0.82         | 0.46         | 0.83          | 0.71          |
| 21677         | <i>Tead2</i>   | TEA domain family member 2                                               | -0.29        | -0.02        | -0.18         | 0.09          |
| 21678         | <i>Tead3</i>   | TEA domain family member 3                                               | -0.37        | 0.32         | 1.44          | 0.99          |
| 21685         | <i>Tef</i>     | thyrotroph embryonic factor                                              | 0.48         | 0.06         | -0.01         | 0.25          |
| 21780         | <i>Tfam</i>    | transcription factor A, mitochondrial                                    | -0.07        | -0.03        | -0.31         | -0.18         |
| 21781         | <i>Tfdp1</i>   | transcription factor Dp 1                                                | -0.20        | -0.17        | -0.47         | -0.29         |

| <b>geneid</b> | <b>symbol</b>  | <b>name</b>                                  | <b>Day 5</b> | <b>Day 8</b> | <b>Day 11</b> | <b>Day 14</b> |
|---------------|----------------|----------------------------------------------|--------------|--------------|---------------|---------------|
| 211586        | <i>Tfdp2</i>   | transcription factor Dp 2                    | -0.36        | 0.05         | -1.04         | -0.11         |
| 54723         | <i>Tfip11</i>  | tuftelin interacting protein 11              | 0.06         | 0.11         | -0.19         | 0.07          |
| 21815         | <i>Tgif1</i>   | TGFB-induced factor homeobox 1               | -0.03        | 0.02         | -0.17         | 0.11          |
| 228839        | <i>Tgif2</i>   | TGFB-induced factor homeobox 2               | -0.11        | 0.17         | -0.53         | 0.16          |
| 21833         | <i>Thra</i>    | thyroid hormone receptor alpha               | 0.15         | -0.10        | 0.09          | 0.27          |
| 21834         | <i>Thrb</i>    | thyroid hormone receptor beta                | 0.31         | 1.23         | 0.16          | 0.71          |
| 21908         | <i>Tlx1</i>    | T-cell leukemia, homeobox 1                  | 1.28         | 0.57         | -1.23         | 1.39          |
| 21909         | <i>Tlx2</i>    | T-cell leukemia, homeobox 2                  | -0.20        | 1.21         | -0.15         | 0.65          |
| 27140         | <i>Tlx3</i>    | T-cell leukemia, homeobox 3                  | 0.09         | 0.45         | 0.44          | 0.29          |
| 21973         | <i>Top2a</i>   | topoisomerase (DNA) II alpha                 | -0.03        | 0.11         | -0.74         | -0.07         |
| 21974         | <i>Top2b</i>   | topoisomerase (DNA) II beta                  | -0.13        | 0.12         | 0.20          | 0.18          |
| 224829        | <i>Trerfl</i>  | transcriptional regulating factor 1          | -0.17        | -0.05        | -0.80         | 0.00          |
| 21849         | <i>Trim28</i>  | tripartite motif-containing 28               | 0.12         | -0.18        | -0.58         | -0.34         |
| 22061         | <i>Trp63</i>   | transformation related protein 63            | 1.31         | -0.38        | 3.54          | 1.27          |
| 22062         | <i>Trp73</i>   | transformation related protein 73            | -0.71        | -1.21        | -1.45         | -1.54         |
| 83925         | <i>Trps1</i>   | trichorhinophalangeal syndrome I (human)     | -0.11        | -0.26        | 0.20          | -0.42         |
| 21807         | <i>Tsc22d1</i> | TSC22 domain family, member 1                | 0.52         | 0.14         | 1.06          | -0.08         |
| 14605         | <i>Tsc22d3</i> | TSC22 domain family, member 3                | 0.50         | 1.26         | 0.35          | 1.17          |
| 78829         | <i>Tsc22d4</i> | TSC22 domain family, member 4                | 0.01         | 0.18         | 0.60          | 0.40          |
| 110796        | <i>Tshz1</i>   | teashirt zinc finger family member 1         | -0.17        | 0.63         | 1.74          | 0.80          |
| 228911        | <i>Tshz2</i>   | teashirt zinc finger family member 2         | -0.18        | 0.72         | 1.30          | 0.74          |
| 243931        | <i>Tshz3</i>   | teashirt zinc finger family member 3         | 0.23         | 0.05         | -1.17         | 0.13          |
| 22160         | <i>Twist1</i>  | twist homolog 1 (Drosophila)                 | -0.32        | 0.29         | -0.92         | 0.19          |
| 13345         | <i>Twist2</i>  | twist homolog 2 (Drosophila)                 | -0.68        | 0.43         | 1.42          | 2.04          |
| 22255         | <i>Uncx</i>    | UNC homeobox                                 | -0.17        | 0.24         | -0.27         | -0.93         |
| 22278         | <i>Usf1</i>    | upstream transcription factor 1              | -0.40        | -0.25        | -1.19         | -0.51         |
| 22282         | <i>Usf2</i>    | upstream transcription factor 2              | 0.26         | 0.07         | -0.02         | 0.11          |
| 22326         | <i>Vax1</i>    | ventral anterior homeobox containing gene 1  | 1.00         | 0.11         | 0.22          | -0.11         |
| 24113         | <i>Vax2</i>    | ventral anterior homeobox containing gene 2  | 0.45         | 0.37         | 2.09          | 1.05          |
| 22337         | <i>Vdr</i>     | vitamin D receptor                           | 0.45         | 0.01         | 2.00          | 1.17          |
| 21427         | <i>Vps72</i>   | vacuolar protein sorting 72 (yeast)          | 0.17         | 0.08         | -0.05         | 0.12          |
| 114889        | <i>Vsx1</i>    | visual system homeobox 1 homolog (zebrafish) | -0.59        | -0.13        | 2.12          | 0.32          |
| 12677         | <i>Vsx2</i>    | visual system homeobox 2                     | -0.13        | 1.07         | -2.15         | 0.47          |
| 22433         | <i>Xbp1</i>    | X-box binding protein 1                      | -0.02        | 0.15         | 0.39          | 0.10          |
| 22632         | <i>Yyl</i>     | YY1 transcription factor                     | 0.05         | 0.13         | -0.08         | 0.09          |
| 235320        | <i>Zbtb16</i>  | zinc finger and BTB domain containing 16     | 0.04         | 0.74         | 0.72          | 1.41          |
| 22642         | <i>Zbtb17</i>  | zinc finger and BTB domain containing 17     | 0.09         | 0.01         | 0.16          | 0.21          |
| 268294        | <i>Zbtb24</i>  | zinc finger and BTB domain containing 24     | 0.24         | 0.27         | 0.39          | 0.28          |
| 245007        | <i>Zbtb38</i>  | zinc finger and BTB domain containing 38     | 0.42         | 0.19         | 0.39          | 0.12          |
| 22724         | <i>Zbtb7b</i>  | zinc finger and BTB domain containing 7B     | 0.17         | 0.05         | 0.79          | 0.41          |



| <b>geneid</b> | <b>symbol</b>   | <b>name</b>                                | <b>Day 5</b> | <b>Day 8</b> | <b>Day 11</b> | <b>Day 14</b> |
|---------------|-----------------|--------------------------------------------|--------------|--------------|---------------|---------------|
| 57432         | <i>Zc3h8</i>    | zinc finger CCCH type containing 8         | -0.31        | -0.18        | -0.53         | -0.55         |
| 21417         | <i>Zeb1</i>     | zinc finger E-box binding homeobox 1       | 0.71         | 0.35         | 0.20          | 0.18          |
| 24136         | <i>Zeb2</i>     | zinc finger E-box binding homeobox 2       | -0.37        | -0.06        | 0.96          | -0.19         |
| 11906         | <i>Zfmx3</i>    | zinc finger homeobox 3                     | -0.15        | -0.12        | 0.36          | -0.20         |
| 80892         | <i>Zfmx4</i>    | zinc finger homeodomain 4                  | -1.16        | -0.31        | 0.15          | -0.68         |
| 22646         | <i>Zfp105</i>   | zinc finger protein 105                    | -0.08        | -0.28        | -0.92         | -0.31         |
| 22661         | <i>Zfp148</i>   | zinc finger protein 148                    | -0.08        | 0.19         | 0.14          | 0.17          |
| 385674        | <i>Zfp174</i>   | zinc finger protein 174                    | 0.11         | 0.28         | 0.63          | 0.44          |
| 432731        | <i>Zfp187</i>   | zinc finger protein 187                    | -0.10        | 0.01         | -0.01         | -0.03         |
| 59057         | <i>Zfp191</i>   | zinc finger protein 191                    | -0.08        | -0.17        | -0.40         | -0.14         |
| 69890         | <i>Zfp219</i>   | zinc finger protein 219                    | -0.08        | 0.04         | -0.23         | 0.03          |
| 226442        | <i>Zfp281</i>   | zinc finger protein 281                    | 0.02         | -0.38        | -0.30         | -0.45         |
| 170740        | <i>Zfp287</i>   | zinc finger protein 287                    | -0.05        | -0.01        | -0.06         | -0.26         |
| 21408         | <i>Zfp354a</i>  | zinc finger protein 354A                   | -0.44        | 0.05         | -0.38         | 0.18          |
| 140482        | <i>Zfp358</i>   | zinc finger protein 358                    | -0.01        | 0.02         | 0.48          | 0.71          |
| 238673        | <i>Zfp367</i>   | zinc finger protein 367                    | 0.01         | -0.05        | -0.35         | -0.13         |
| 235682        | <i>Zfp445</i>   | zinc finger protein 445                    | -0.46        | -0.12        | -0.30         | -0.17         |
| 232816        | <i>Zfp628</i>   | zinc finger protein 628                    | -0.11        | 0.26         | -0.43         | 0.32          |
| 67778         | <i>Zfp639</i>   | zinc finger protein 639                    | 0.01         | -0.02        | -0.21         | -0.03         |
| 100009600     | <i>Zglp1</i>    | zinc finger, GATA-like protein 1           | -0.37        | -0.19        | -0.49         | -0.30         |
| 229007        | <i>Zgpat</i>    | zinc finger, CCCH-type with G patch domain | 0.02         | -0.12        | 0.14          | -0.07         |
| 22770         | <i>Zhx1</i>     | zinc fingers and homeoboxes 1              | -0.11        | -0.01        | 0.69          | 0.07          |
| 387609        | <i>Zhx2</i>     | zinc fingers and homeoboxes 2              | -0.24        | -0.10        | 0.89          | -0.10         |
| 320799        | <i>Zhx3</i>     | zinc fingers and homeoboxes 3              | 0.02         | 0.35         | 1.05          | 0.46          |
| 22771         | <i>Zic1</i>     | zinc finger protein of the cerebellum 1    | -0.08        | 0.40         | -1.16         | -1.37         |
| 22772         | <i>Zic2</i>     | zinc finger protein of the cerebellum 2    | -1.37        | -0.28        | -0.98         | -0.10         |
| 65100         | <i>Zic5</i>     | zinc finger protein of the cerebellum 5    | -1.04        | -0.36        | -1.09         | -0.36         |
| 74570         | <i>Zkscan1</i>  | zinc finger with KRAB and SCAN domains 1   | 0.08         | 0.32         | 0.25          | 0.31          |
| 67235         | <i>Zkscan14</i> | zinc finger with KRAB and SCAN domains 14  | 0.15         | 0.57         | 0.49          | 0.54          |
| 268417        | <i>Zkscan17</i> | zinc finger with KRAB and SCAN domains 17  | 0.07         | 0.13         | -0.30         | -0.02         |
| 72739         | <i>Zkscan3</i>  | zinc finger with KRAB and SCAN domains 3   | -0.38        | -0.06        | 0.53          | 0.08          |
| 22757         | <i>Zkscan5</i>  | zinc finger with KRAB and SCAN domains 5   | 0.06         | 0.21         | -0.47         | 0.00          |
| 52712         | <i>Zkscan6</i>  | zinc finger with KRAB and SCAN domains 6   | 0.28         | 0.28         | 0.18          | 0.29          |
| 332221        | <i>Zscan10</i>  | zinc finger and SCAN domain containing 10  | -0.48        | -0.85        | -1.18         | -0.97         |
| 22758         | <i>Zscan12</i>  | zinc finger and SCAN domain containing 12  | 0.15         | 0.08         | 0.10          | -0.07         |
| 22691         | <i>Zscan2</i>   | zinc finger and SCAN domain containing 2   | 0.32         | 0.44         | 0.61          | 0.61          |
| 269585        | <i>Zscan20</i>  | zinc finger and SCAN domains 20            | -0.11        | 0.08         | -0.23         | 0.06          |
| 22697         | <i>Zscan21</i>  | zinc finger and SCAN domain containing 21  | 0.03         | 0.08         | -0.15         | 0.14          |
| 80292         | <i>Zxdc</i>     | ZXD family zinc finger C                   | 0.27         | 0.86         | 0.38          | 1.01          |

Supplemental Table S6. Expression levels of transcription factors that regulate cardiomyocyte differentiation in TCDD-treated AHR-positive cells relative to controls (Log2 Fold change)

| geneid | symbol        | AHR PWM | name                                                                              | Day 5 | Day 8 | Day 11 | Day 14 |
|--------|---------------|---------|-----------------------------------------------------------------------------------|-------|-------|--------|--------|
| 11910  | <i>Atf3</i>   | No      | activating transcription factor 3                                                 | 0.37  | 2.51  | 0.44   | 0.22   |
| 223922 | <i>Atf7</i>   | No      | activating transcription factor 7                                                 | 0.21  | 1.01  | 0.24   | 0.28   |
| 12053  | <i>Bcl6</i>   | Yes     | B-cell leukemia/lymphoma 6                                                        | 0.34  | 2.62  | 0.77   | 0.68   |
| 12578  | <i>Cdkn2a</i> | No      | cyclin-dependent kinase inhibitor 2A                                              | 0.54  | 1.78  | 0.41   | 0.22   |
| 12606  | <i>Cebpa</i>  | No      | CCAAT/enhancer binding protein (C/EBP), alpha                                     | -0.14 | 1.09  | 1.35   | 0.33   |
| 12705  | <i>Cited1</i> | Yes     | Cbp/p300-interacting transactivator with Glu/Asp-rich carboxy-terminal domain 1   | 0.08  | 2.06  | 1.84   | 1.35   |
| 17684  | <i>Cited2</i> | No      | Cbp/p300-interacting transactivator, with Glu/Asp-rich carboxy-terminal domain, 2 | 0.08  | 1.35  | 0.81   | 0.79   |
| 12914  | <i>Crebbp</i> | Yes     | CREB binding protein                                                              | 0.02  | 0.06  | -0.03  | 0.19   |
| 12387  | <i>Ctnnb1</i> | No      | catenin (cadherin associated protein), beta 1                                     | 0.00  | -0.16 | 0.14   | 0.08   |
| 13393  | <i>Dlx3</i>   | Yes     | distal-less homeobox 3                                                            | 0.48  | 2.99  | 1.61   | 1.04   |
| 13819  | <i>Epas1</i>  | Yes     | endothelial PAS domain protein 1                                                  | 0.43  | 0.17  | -0.06  | 0.11   |
| 23871  | <i>Ets1</i>   | Yes     | E26 avian leukemia oncogene 1, 5' domain                                          | 0.45  | 1.79  | 0.00   | -0.06  |
| 15376  | <i>Foxa2</i>  | No      | forkhead box A2                                                                   | -0.50 | 0.91  | 0.21   | -0.10  |
| 17300  | <i>Foxc1</i>  | No      | forkhead box C1                                                                   | 0.53  | 1.28  | 1.48   | 0.26   |
| 14234  | <i>Foxc2</i>  | No      | forkhead box C2                                                                   | 1.81  | 1.14  | 2.21   | 1.64   |
| 14106  | <i>Foxh1</i>  | No      | forkhead box H1                                                                   | -0.72 | -1.01 | -1.25  | -0.82  |
| 108655 | <i>Foxp1</i>  | No      | forkhead box P1                                                                   | -0.89 | -1.11 | -0.90  | -0.53  |
| 14461  | <i>Gata2</i>  | Yes     | GATA binding protein 2                                                            | 0.73  | 1.66  | 2.09   | 1.41   |
| 14462  | <i>Gata3</i>  | Yes     | GATA binding protein 3                                                            | 1.34  | 2.28  | 1.47   | 0.69   |
| 14463  | <i>Gata4</i>  | No      | GATA binding protein 4                                                            | 0.59  | 0.84  | 0.69   | 0.19   |
| 14465  | <i>Gata6</i>  | No      | GATA binding protein 6                                                            | 0.90  | 1.91  | 0.94   | 0.43   |
| 14472  | <i>Gbx2</i>   | No      | gastrulation brain homeobox 2                                                     | 0.08  | -0.20 | -1.07  | -0.94  |
| 14634  | <i>Gli3</i>   | Yes     | GLI-Kruppel family member GLI3                                                    | -0.24 | 0.29  | 0.20   | 0.06   |
| 15110  | <i>Hand1</i>  | Yes     | heart and neural crest derivatives expressed transcript 1                         | 0.03  | 4.32  | 1.60   | 1.08   |
| 15111  | <i>Hand2</i>  | Yes     | heart and neural crest derivatives expressed transcript 2                         | 1.14  | -0.86 | 1.55   | 1.37   |
| 433759 | <i>Hdac1</i>  | No      | histone deacetylase 1                                                             | -0.07 | -0.29 | 0.00   | -0.01  |
| 15214  | <i>Hey2</i>   | No      | hairy/enhancer-of-split related with YRPW motif 2                                 | -0.33 | 0.57  | 0.30   | 0.58   |
| 21405  | <i>Hnf1a</i>  | No      | HNF1 homeobox A                                                                   | 0.90  | -0.25 | 0.13   | 0.22   |
| 74318  | <i>Hopx</i>   | No      | HOP homeobox                                                                      | -1.73 | -1.46 | -0.35  | -0.42  |
| 15394  | <i>Hoxa1</i>  | Yes     | homeobox A1                                                                       | 0.59  | 1.76  | 1.08   | 0.77   |
| 15395  | <i>Hoxa10</i> | Yes     | homeobox A10                                                                      | 1.22  | 1.19  | 0.44   | 0.93   |
| 15400  | <i>Hoxa3</i>  | No      | homeobox A3                                                                       | 0.32  | 2.24  | 0.66   | 0.78   |

| geneid | symbol        | AHR PWM | name                                                                         | Day 5 | Day 8 | Day 11   | Day 14 |
|--------|---------------|---------|------------------------------------------------------------------------------|-------|-------|----------|--------|
| 15410  | <i>Hoxb3</i>  | No      | homeobox B3                                                                  | -1.18 | -1.56 | 0.54     | 0.60   |
| 15413  | <i>Hoxb5</i>  | No      | homeobox B5                                                                  | 0.61  | -2.91 | -0.54    | 0.87   |
| 15430  | <i>Hoxd10</i> | No      | homeobox D10                                                                 | 1.74  | -0.31 | 0.06     | 0.68   |
| 50916  | <i>Irx4</i>   | No      | Iroquois related homeobox 4 (Drosophila)                                     | 0.35  | 3.37  | 1.97     | -0.01  |
| 16392  | <i>Isl1</i>   | No      | ISL1 transcription factor, LIM/homeodomain                                   | 0.24  | 0.70  | 1.07     | 0.32   |
| 16476  | <i>Jun</i>    | No      | Jun oncogene                                                                 | 0.46  | 2.16  | 0.24     | 0.20   |
| 16598  | <i>Klf2</i>   | No      | Kruppel-like factor 2 (lung)                                                 | 1.06  | 0.65  | 0.60     | 0.38   |
| 12224  | <i>Klf5</i>   | Yes     | Kruppel-like factor 5                                                        | 0.32  | 1.53  | 0.28     | 0.11   |
| 16842  | <i>Lef1</i>   | Yes     | lymphoid enhancer binding factor 1                                           | -2.34 | -2.59 | -0.86    | -0.25  |
| 17260  | <i>Mef2c</i>  | No      | myocyte enhancer factor 2C                                                   | -1.39 | -2.19 | 0.23     | 0.47   |
| 17268  | <i>Meis1</i>  | No      | Meis homeobox 1                                                              | 0.33  | 2.85  | 1.28     | 0.56   |
| 17292  | <i>Mesp1</i>  | No      | mesoderm posterior 1                                                         | -1.05 | -0.37 | 0.39     | 0.08   |
| 17293  | <i>Mesp2</i>  | No      | mesoderm posterior 2                                                         | 1.21  | -0.46 | 0.44     | 0.69   |
| 17387  | <i>Mmp14</i>  | Yes     | matrix metalloproteinase 14 (membrane-inserted)                              | -0.32 | 2.52  | 0.15     | -0.15  |
| 17701  | <i>Msx1</i>   | Yes     | homeobox, msh-like 1                                                         | -2.06 | -2.26 | -0.48    | 0.77   |
| 17869  | <i>Myc</i>    | Yes     | myelocytomatosis oncogene                                                    | -0.83 | -0.54 | -0.58    | -0.31  |
| 18109  | <i>Mycn</i>   | Yes     | v-myc myelocytomatosis viral related oncogene, neuroblastoma derived (avian) | -0.41 | -1.39 | -1.01    | -0.61  |
| 71950  | <i>Nanog</i>  | Yes     | Nanog homeobox                                                               | 0.90  | 0.40  | 0.73     | 0.61   |
| 18091  | <i>Nkx2-5</i> | No      | NK2 transcription factor related, locus 5 (Drosophila)                       | -1.15 | -0.78 | -8901.00 | -0.93  |
| 18092  | <i>Nkx2-6</i> | No      | NK2 transcription factor related, locus 6 (Drosophila)                       | -1.15 | -0.78 | -0.11    | -0.14  |
| 11819  | <i>Nr2f2</i>  | Yes     | nuclear receptor subfamily 2, group F, member 2                              | 2.06  | 3.14  | 0.83     | 0.05   |
| 15370  | <i>Nr4a1</i>  | No      | nuclear receptor subfamily 4, group A, member 1                              | -0.08 | 1.13  | 0.37     | 0.01   |
| 26423  | <i>Nr5a1</i>  | Yes     | nuclear receptor subfamily 5, group A, member 1                              | -0.05 | 0.17  | 0.93     | -0.62  |
| 26424  | <i>Nr5a2</i>  | Yes     | nuclear receptor subfamily 5, group A, member 2                              | 1.18  | 1.28  | 0.38     | 0.21   |
| 18505  | <i>Pax3</i>   | Yes     | paired box gene 3                                                            | -0.21 | 1.36  | -0.68    | -0.23  |
| 18508  | <i>Pax6</i>   | No      | paired box gene 6                                                            | -0.54 | -0.77 | -0.50    | -0.26  |
| 18741  | <i>Pitx2</i>  | Yes     | paired-like homeodomain transcription factor 2                               | -0.41 | -1.07 | 0.05     | 0.30   |
| 18999  | <i>Pou5f1</i> | Yes     | POU domain, class 5, transcription factor 1                                  | -0.57 | -0.79 | -0.32    | -0.18  |
| 19130  | <i>Prox1</i>  | Yes     | prospero-related homeobox 1                                                  | -0.01 | 0.83  | 0.14     | 0.28   |
| 18933  | <i>Prrxl</i>  | No      | paired related homeobox 1                                                    | -0.05 | 1.22  | -0.05    | 0.29   |
| 218772 | <i>Rarb</i>   | No      | retinoic acid receptor, beta                                                 | 0.71  | 2.73  | 1.59     | 0.42   |
| 19411  | <i>Rarg</i>   | Yes     | retinoic acid receptor, gamma                                                | -0.23 | -0.47 | -0.38    | -0.16  |
| 19697  | <i>Rela</i>   | No      | v-rel reticuloendotheliosis viral oncogene homolog A (avian)                 | 0.24  | 1.21  | 0.13     | 0.08   |
| 12394  | <i>Runx1</i>  | Yes     | runt related transcription factor 1                                          | -0.05 | 2.53  | 0.04     | -0.19  |
| 12393  | <i>Runx2</i>  | Yes     | runt related transcription factor 2                                          | -0.04 | -0.44 | -1.21    | -0.35  |

| geneid | symbol        | AHR PWM | name                                                     | Day 5 | Day 8 | Day 11 | Day 14 |
|--------|---------------|---------|----------------------------------------------------------|-------|-------|--------|--------|
| 20429  | <i>Shox2</i>  | No      | short stature homeobox 2                                 | 0.07  | 0.60  | 1.46   | 0.69   |
| 17127  | <i>Smad3</i>  | No      | MAD homolog 3 (Drosophila)                               | 0.20  | 1.30  | 0.65   | 0.21   |
| 17128  | <i>Smad4</i>  | Yes     | MAD homolog 4 (Drosophila)                               | 0.22  | 0.84  | -0.04  | 0.00   |
| 20665  | <i>Sox10</i>  | Yes     | SRY-box containing gene 10                               | -0.04 | -1.41 | 0.15   | 0.00   |
| 20671  | <i>Sox17</i>  | Yes     | SRY-box containing gene 17                               | 1.11  | 1.08  | 0.89   | 0.14   |
| 20672  | <i>Sox18</i>  | No      | SRY-box containing gene 18                               | -0.26 | -2.47 | -0.11  | 0.17   |
| 20674  | <i>Sox2</i>   | Yes     | SRY-box containing gene 2                                | 0.59  | -0.25 | 0.10   | 0.12   |
| 20677  | <i>Sox4</i>   | Yes     | SRY-box containing gene 4                                | -0.42 | -0.12 | -0.19  | -0.09  |
| 20678  | <i>Sox5</i>   | Yes     | SRY-box containing gene 5                                | 0.93  | 0.26  | 1.09   | -0.17  |
| 20679  | <i>Sox6</i>   | No      | SRY-box containing gene 6                                | -0.19 | 1.04  | -0.36  | -0.45  |
| 20680  | <i>Sox7</i>   | Yes     | SRY-box containing gene 7                                | 0.88  | 0.13  | -0.42  | 0.11   |
| 20681  | <i>Sox8</i>   | No      | SRY-box containing gene 8                                | 0.68  | -0.72 | 0.17   | 0.68   |
| 20682  | <i>Sox9</i>   | Yes     | SRY-box containing gene 9                                | 0.09  | 0.94  | 1.38   | -0.23  |
| 20848  | <i>Stat3</i>  | No      | signal transducer and activator of transcription 3       | 0.35  | 1.25  | 0.37   | 0.27   |
| 20850  | <i>Stat5a</i> | Yes     | signal transducer and activator of transcription 5A      | 0.72  | 1.35  | 0.95   | 0.52   |
| 20997  | <i>T</i>      | Yes     | brachyury                                                | -3.14 | -0.35 | -0.29  | -1.26  |
| 21349  | <i>Tal1</i>   | No      | T-cell acute lymphocytic leukemia 1                      | -1.75 | -3.80 | -1.96  | 1.09   |
| 21380  | <i>Tbx1</i>   | No      | T-box 1                                                  | 0.89  | 0.78  | 0.39   | -0.17  |
| 76365  | <i>Tbx18</i>  | Yes     | T-box18                                                  | 1.05  | -0.29 | 0.22   | 0.35   |
| 21385  | <i>Tbx2</i>   | No      | T-box 2                                                  | 0.26  | 0.83  | 1.13   | 0.74   |
| 57246  | <i>Tbx20</i>  | No      | T-box 20                                                 | -0.40 | 0.25  | -0.45  | 0.29   |
| 21386  | <i>Tbx3</i>   | Yes     | T-box 3                                                  | 1.59  | 2.22  | 1.29   | 0.84   |
| 21388  | <i>Tbx5</i>   | Yes     | T-box 5                                                  | 0.48  | -0.12 | -0.46  | -0.09  |
| 21414  | <i>Tcf7</i>   | No      | transcription factor 7, T-cell specific                  | -0.19 | -0.84 | -0.10  | -0.03  |
| 21415  | <i>Tcf7l1</i> | No      | transcription factor 7-like 1 (T-cell specific, HMG box) | 0.00  | -0.51 | 0.17   | 0.02   |
| 21416  | <i>Tcf7l2</i> | No      | transcription factor 7-like 2, T-cell specific, HMG-box  | -0.09 | 0.61  | 0.70   | 0.22   |
| 21676  | <i>Tead1</i>  | No      | TEA domain family member 1                               | 0.06  | 1.30  | 0.25   | 0.07   |
| 21679  | <i>Tead4</i>  | Yes     | TEA domain family member 4                               | 0.43  | 2.29  | 0.46   | 0.19   |
| 22059  | <i>Trp53</i>  | Yes     | transformation related protein 53                        | 0.05  | -0.26 | -0.18  | -0.09  |
| 22431  | <i>Wt1</i>    | No      | Wilms tumor 1 homolog                                    | -1.24 | -3.08 | -1.15  | -1.06  |
| 22773  | <i>Zic3</i>   | Yes     | zinc finger protein of the cerebellum 3                  | -0.23 | -0.43 | -0.62  | -0.39  |

Supplemental Table S7. Summary of PcG and TxG genes affected in their expression by TCDD treatment in AHR-positive cells

| Gene          | Description                                                                                                                    | Function                                                                                                                                                                                                                                                                                                             | Expression                                                                                                                                                                                                                                                       | Reference                                                   |
|---------------|--------------------------------------------------------------------------------------------------------------------------------|----------------------------------------------------------------------------------------------------------------------------------------------------------------------------------------------------------------------------------------------------------------------------------------------------------------------|------------------------------------------------------------------------------------------------------------------------------------------------------------------------------------------------------------------------------------------------------------------|-------------------------------------------------------------|
| <i>Cbx1</i>   | Chromobox protein homolog 1                                                                                                    | Component of heterochromatin.                                                                                                                                                                                                                                                                                        | In all adult and embryonic tissues                                                                                                                                                                                                                               | (Singh et al. 1991)                                         |
| <i>Cbx2</i>   | Chromobox protein homolog 2; also known as M33.                                                                                | Component of a PcG multiprotein PRC1-like complex, which function as a transcriptional repressor. Critical roles in germ cell viability, meiosis onset and homologous chromosome synapsis in mammalian germ line.                                                                                                    | Expressed in most embryonic tissue except the heart from ED8.5-11.5; expressed in CNS, PNS, olfactory and tongue epithelia, lung gastrointestinal duct and urogenital system at ED 13.5; CNS, thymus, various epithelial cell types at ED 15.5.                  | (Schoorlemmer et al. 1997; Baumann and De La Fuente 2011)   |
| <i>Cbx3</i>   | Chromobox protein homolog 3                                                                                                    | Component of heterochromatin; interact with Dia-1/SRF, whose interaction is essential for smooth muscle cell differentiation from stem cells and for the development of functional cardiovascular system.                                                                                                            | Localized in the nucleus; associated with euchromatin and is largely excluded from constitutive heterochromatin.                                                                                                                                                 | (Horsley et al. 1996; Xiao et al. 2011)                     |
| <i>Cbx4</i>   | Chromobox protein homolog 4                                                                                                    | E3 SUMO-protein ligase which facilitates SUMO1 conjugation; a component of a PcG multiprotein PRC1-like complex.                                                                                                                                                                                                     | Localized in the nucleus.                                                                                                                                                                                                                                        | (Alkema et al. 1997; Ismail et al. 2012)                    |
| <i>Cbx8</i>   | Chromobox protein homolog 8                                                                                                    | Component of a PcG multiprotein PRC1-like complex, which functions as a transcriptional repressor.                                                                                                                                                                                                                   | Expressed at low levels throughout embryogenesis, decreased at later stages.                                                                                                                                                                                     | (Hemenway et al. 2000; Cao et al. 2005)                     |
| <i>Chd3</i>   | Chromodomain helicase DNA binding protein 3                                                                                    | Not known in mouse. In human, it is a component of the histone deacetylase NuRD complex which remodels chromatin by deacetylating histones.                                                                                                                                                                          | Widely expressed in human. Not known in mouse.                                                                                                                                                                                                                   | (Tong et al. 1998)                                          |
| <i>Chd9</i>   | Chromodomain-helicase-DNA-binding protein 9; peroxisomal proliferator-activator receptor A-interacting complex 320 kDa protein | May act as a transcriptional co-activator for PPARA and possibly other nuclear receptor; a potential ATP-dependent chromatin remodeling protein; binds to A/T-rich DNA and has DNA-dependent ATPase activity                                                                                                         | Expressed in osteoprogenitor cells during development and in mature bone.                                                                                                                                                                                        | (Shur et al. 2006; Surapureddi et al. 2006)                 |
| <i>Dnmt3a</i> | DNA methyltransferase                                                                                                          | Required for genome-wide <i>de novo</i> methylation and is essential for the establishment of DNA methylation patterns during development. Also plays a role in paternal and maternal imprinting; essential for mammalian proper development. Regulate gene transcription in addition to <i>de novo</i> methylation. | Ubiquitously expressed in mesenchymal cells after ED 10.5 during embryogenesis. In somatic cells, isoform 1 is expressed ubiquitously at low levels. Isoform 2 is restricted to tissues containing cells which are undergoing active <i>de novo</i> methylation. | (Okano et al. 1999; Fuks et al. 2001; Watanabe et al. 2002) |

| Gene            | Description                                                                                                                         | Function                                                                                                                                                                                                                             | Expression                                                                                                                                                    | Reference                                      |
|-----------------|-------------------------------------------------------------------------------------------------------------------------------------|--------------------------------------------------------------------------------------------------------------------------------------------------------------------------------------------------------------------------------------|---------------------------------------------------------------------------------------------------------------------------------------------------------------|------------------------------------------------|
| <i>Dnmt3b</i>   | DNA methyltransferase                                                                                                               | Required for genome-wide <i>de novo</i> methylation and is essential for the establishment of DNA methylation patterns during development. Also function as transcriptional co-repressor.                                            | Highly expressed in totipotent embryonic cells such as inner cell mass, epiblast and embryonic ectoderm cells.                                                | (Okano et al. 1999; Watanabe et al. 2002)      |
| <i>Mbd5</i>     | Belong to Methyl-Binding proteins                                                                                                   | Associate with heterochromatin but do not bind to methylated DNA. May contribute to the formation or function of heterochromatin.                                                                                                    | Expressed in all tissues, but with a wide range of levels; the highest expression was in the brain, testis and oocytes.                                       | (Laget et al. 2010)                            |
| <i>Mll5</i>     | Myeloid/lymphoid or mixed-lineage leukemia protein 5 homolog                                                                        | Specifically mono- and di-methylates Histone H3 Lys4. The methylated H3K4 represents a specific tag for epigenetic transcriptional activation. Also function as an important cell cycle regulator.                                   | Nucleus speckle (by similarity)                                                                                                                               | (Sebastian et al. 2009)                        |
| <i>Pcgf5</i>    | Polycomb group RING finger protein 5                                                                                                | Component of a PcG multiprotein PRC-1 like complex, which function as a transcriptional repressor.                                                                                                                                   | May expressed in nucleus (by similarity)                                                                                                                      | (Barrett et al. 2009)                          |
| <i>Pcgf6</i>    | Polycomb group RING finger protein 6                                                                                                | Transcriptional repressor. A component of a PcG multiprotein PRC-1 like complex, which functions as a transcriptional repressor.                                                                                                     | Expressed in ovary, testis, stomach, liver, thymus and kidney.                                                                                                | (Akasaka et al. 2002)                          |
| <i>Ph1</i>      | Polyhomeotic-like protein 1                                                                                                         | Component of a PcG multiprotein PRC1-like complex, which functions as transcription repressor of many genes throughout development.                                                                                                  | Highly expressed in testis with lower levels in most other tissues                                                                                            | (Takahara et al. 1997; Isono et al. 2005)      |
| <i>Ph2</i>      | Polyhomeotic-like protein 2                                                                                                         | Refer to the above cell                                                                                                                                                                                                              | Ubiquitously expressed in embryos and adult tissues.                                                                                                          | (Yamaki et al. 2002; Isono et al. 2005)        |
| <i>Setbp1</i>   | SET-binding protein                                                                                                                 | May function in the SET-related leukemogenesis and tumorigenesis by suppressing SET function                                                                                                                                         | Expressed ubiquitously in all human adult tissues.                                                                                                            | (Minakuchi et al. 2001)                        |
| <i>Setd7</i>    | Histone H4-K4 methyltransferase SETD7; SET domain-containing protein.                                                               | Specifically monomethylates Histone H3 Lys4. Methylated H4K4 represents a marker for epigenetic transcriptional activation.                                                                                                          | Expressed during all pre-implementation stages during embryogenesis.                                                                                          | (Jeong et al. 2005)                            |
| <i>Sirt2</i>    | Silent information regulator 2, members of Sir2 family share a ~260 amino acid region of homology, being divided into five classes. | NAD-dependent deacetylase. SIRT2 is an important regulator of programmed necrosis. Marked protection from ischaemic injury was observed from either <i>Sirt2</i> <sup>-/-</sup> mice or wild type mice treated with Sirt2 inhibitor. | Expressed in the cytoplasm, colocalized with microtubules.                                                                                                    | (Narayan et al. 2012)                          |
| <i>Smarcal1</i> | SWI/SNF-related matrix-associated actin-dependent regulator of chromatin subfamily A member 1                                       | Energy-transducing component of the nucleosome-remodeling factor and CERF complex. May play a role in neural development.                                                                                                            | Predominantly expressed in cortex, cerebellum, ovaries, testes, uterus and placenta. During development, expressed throughout the embryo at ED 9.5 to ED 15.5 | (Lazzaro and Picketts 2001; Barak et al. 2003) |

| <b>Gene</b>    | <b>Description</b>                          | <b>Function</b>                                                                                                                                                                                                                                                                                                                                                                                                                                                                                                                 | <b>Expression</b>                                                                                                       | <b>Reference</b>                                                    |
|----------------|---------------------------------------------|---------------------------------------------------------------------------------------------------------------------------------------------------------------------------------------------------------------------------------------------------------------------------------------------------------------------------------------------------------------------------------------------------------------------------------------------------------------------------------------------------------------------------------|-------------------------------------------------------------------------------------------------------------------------|---------------------------------------------------------------------|
| <i>Smarca2</i> | A member of the SWI/SNF family of proteins. | Transcriptional coactivator cooperating with hormone receptors to potentiate transcription activation. Involved in vitamin D-coupled transcription regulation. Belong to the neural progenitors-specific chromatin remodeling complex and the neuron-specific chromatin remodeling complex, with the former essential for the self-renewal/proliferative capacity of the neural stem cells and the later role of regulating the genes for dendrite growth. Mutations in this gene cause Nicolaides-Baraitser syndrome in human. | Expressed in the cortical plate in the embryo and in the cortex and the hippocampus in adult. Localized in the nucleus. | (Lessard et al. 2007; Van Houdt et al. 2012)                        |
| <i>Suv39h2</i> | Histone H3-lysine 9 N-methyltransferase 2   | Specifically trimethylates Histone H3 Lys9 using monomethylated H3 Lys9 as substrate. H3-Lys9 trimethylation is a specific tag for epigenetics transcriptional repression. Epigenetically regulate telomere length in mammalian cells; may regulate higher-order chromatin organization;                                                                                                                                                                                                                                        | Testis specific; predominant expressed in type B spermatogonia and preleptotene spermatocytes;                          | (O'Carroll et al. 2000; Peters et al. 2001; Garcia-Cao et al. 2004) |
| <i>Suv39h1</i> | Histon H3-lysine 9 N-methyltransferase 1    | Refer to the above cell. In addition, Suv39h1 is targeted to Histone H3 via its interaction with RB1 and is involved in many processes including regulation of the control switch for exiting the cell cycle and entering differentiation etc.                                                                                                                                                                                                                                                                                  | Expression present throughout embryogenesis; widely expressed.                                                          | (Nielsen et al. 2001; Peters et al. 2001; Garcia-Cao et al. 2004)   |

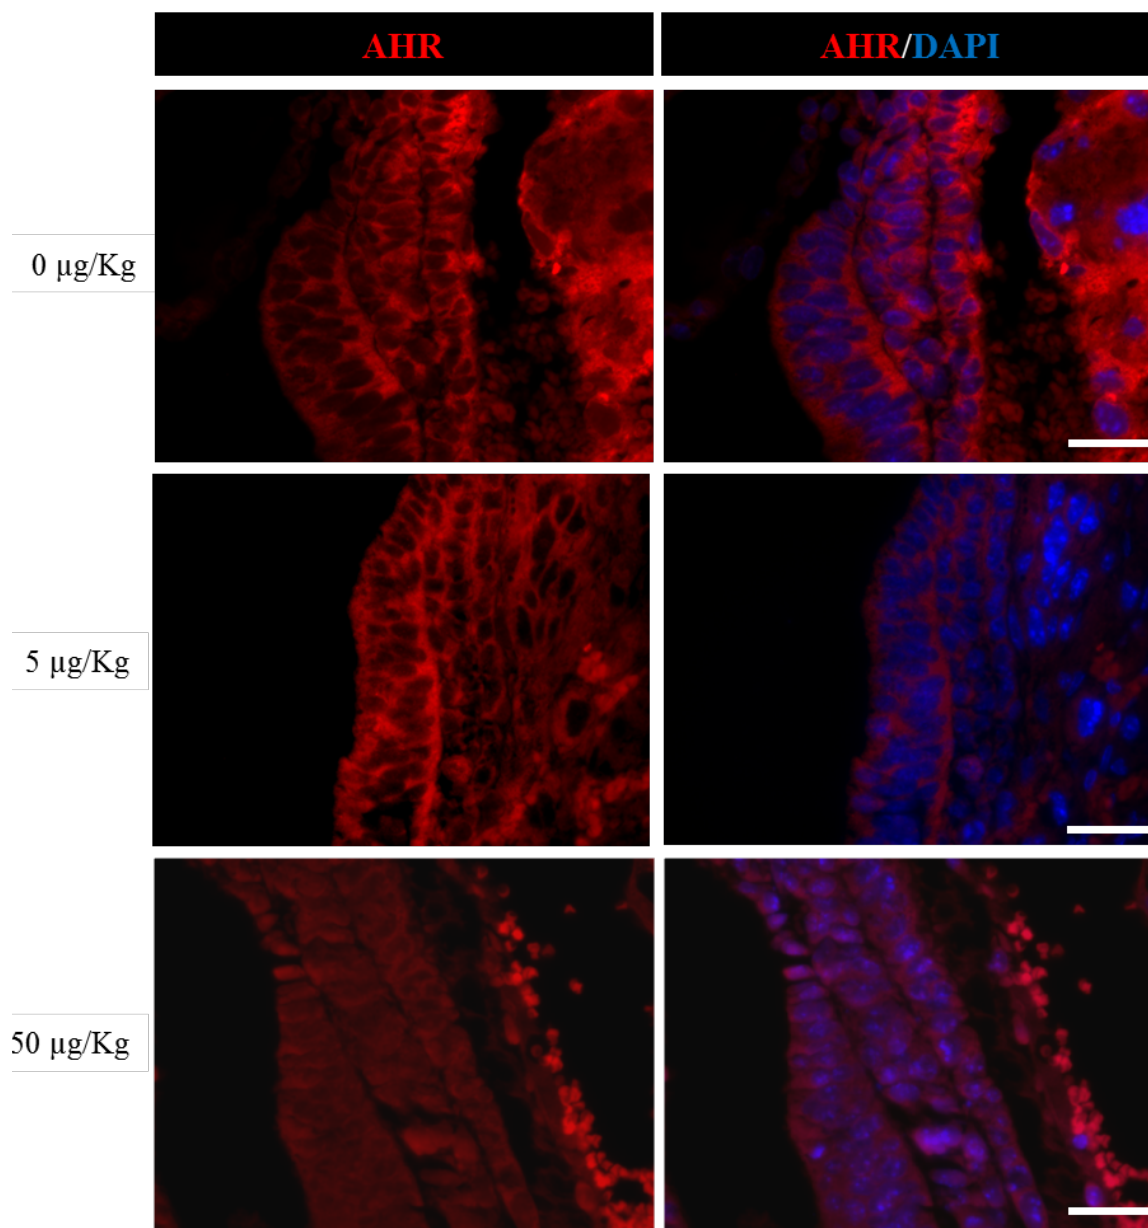

Supplemental Figure S1. Higher magnification of the GD7.5 embryos shown in Fig. 1A.

The micrograph shows the localization of the AHR in cytosol in control and at the low dose of 5 µg/kg and in both cytosol and nucleus at the higher dose of 50 µg/kg. Bar = 20 µm



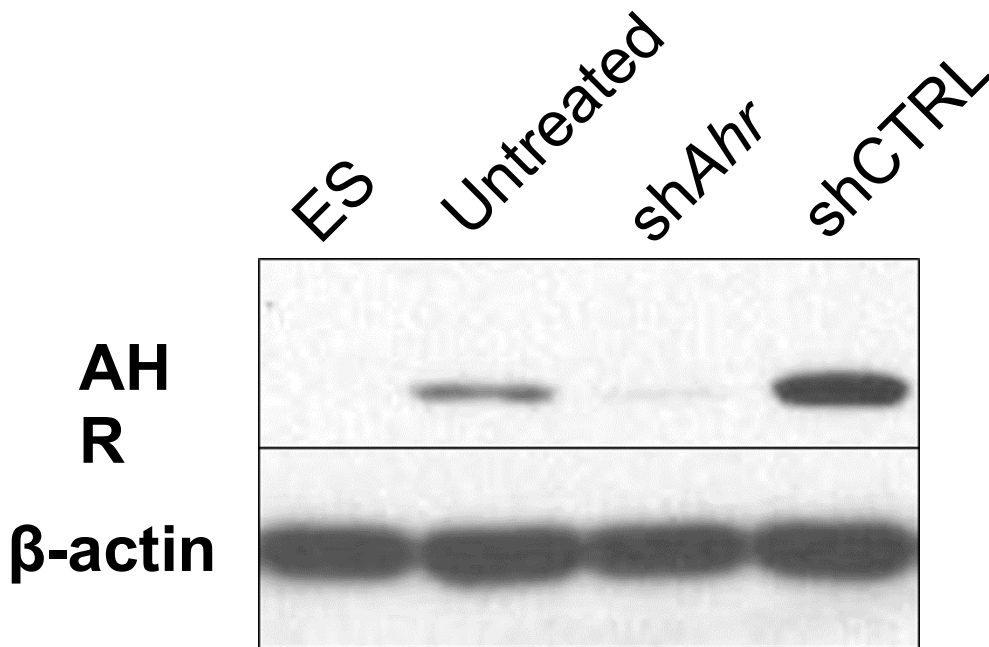

Supplemental Figure S2. Stable integration of an *Ahr* ShRNA lentivirus inhibits AHR expression.

ES cells were infected with a lentivirus control (ShCTRL) or a lentivirus expressing *Ahr* ShRNA (sh*Ahr*) and subjected to EB differentiation. Cell lysates were prepared on differentiation day 7 and used for Western immunoblotting using AHR antibodies. *ES*: ES cell lysate; *Untreated*: lysate from ES cells allowed to differentiate for 7 days.

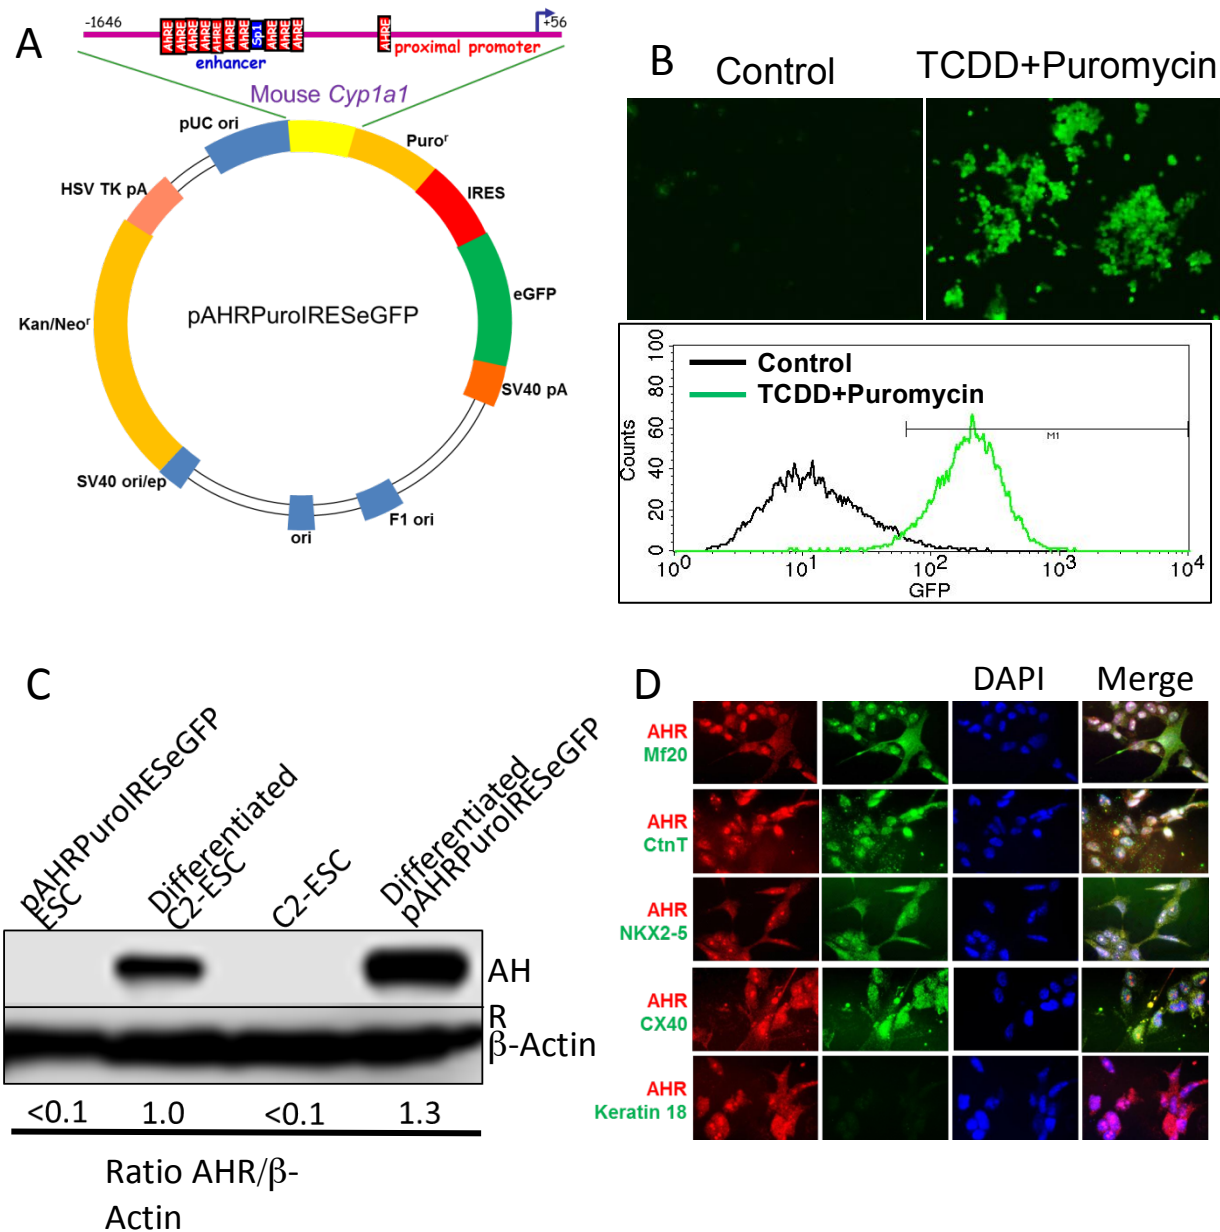

Supplemental Figure S3. Characterization of AHR-positive cardiomyocytes.

(A) Map of the pAHRPuroIRESeGFP vector used for promoter sorting cell selection. (B) EGFP fluorescence increased significantly in puromycin-resistant differentiating cells and the eGFP-expressing cells were detectable microscopically (Top panels). Fluorescence-activated cell sorting analysis demonstrated an obvious fluorescent shift (Bottom panel). We estimate the purity of these cells at greater than 90%. (C) Western blot immunodetection of AHR expression

in the pAHRPuroIRESeGFP cells. AHR expression is undetectable in both the undifferentiated pAHRPuroIRESeGFP ES cells and the parent C2-ES cells. After differentiation, the PAHRPuroIRESeGFP cells show some 30% increase in AHR levels relative to  $\beta$ -actin in comparison to the AHR levels in differentiated C2-ES cells, probably due to the selection against AHR-negative cells. (D) A pAHRPuroIRESeGFP clone, termed C5, was further expanded, allowed to differentiate for several passages and characterized for expression of developmental markers by immunofluorescence. All survivors of puromycin selection expressed AHR, the mesodermal marker MF20, and the mesendodermal marker GATA4, but lacked expression of the ectodermal marker keratin 18. DAPI: nuclear staining; Merge: merge of all three images in columns 1–3. These cells also expressed NKX2-5, a cardiac homeobox transcription factor and marker of mesoderm, and the cardiac markers connexin 40 and troponin T, strongly suggesting that the selected cells are cardiomyocytes.

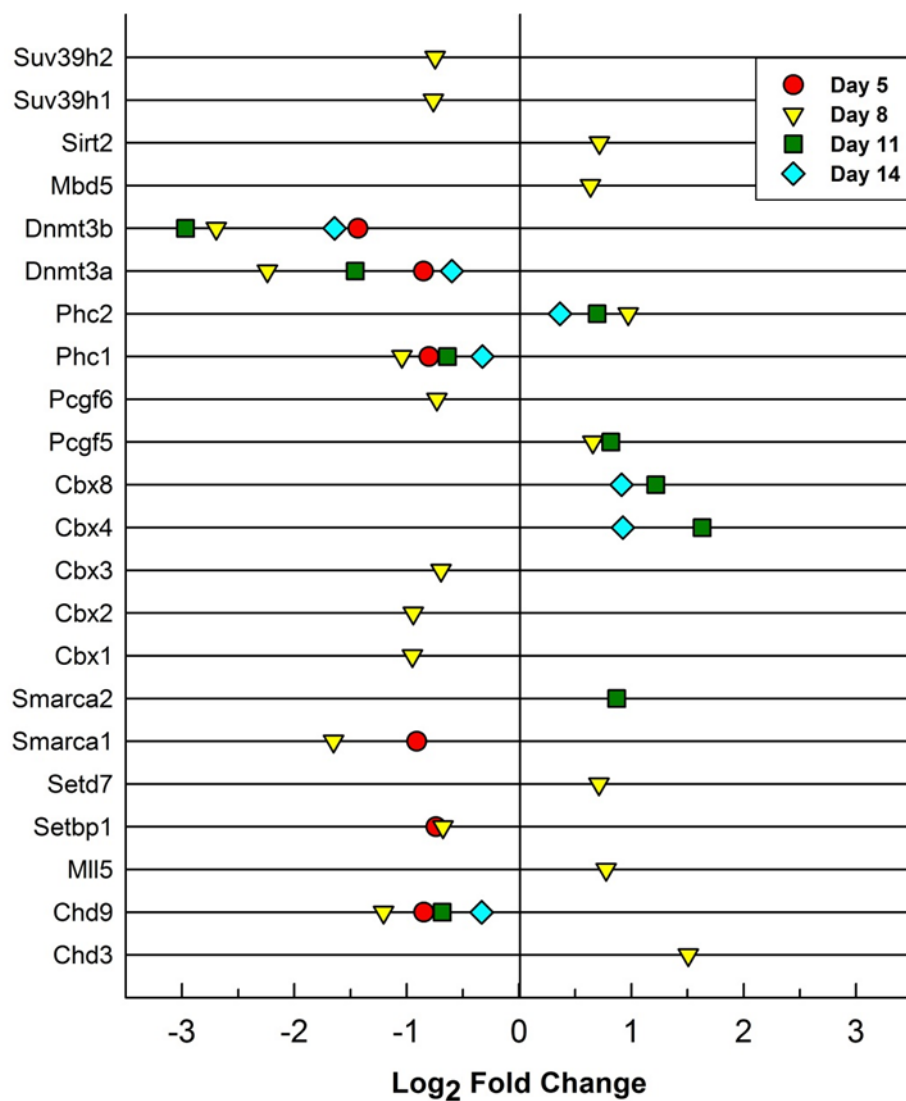

Supplemental Figure S4. Time-dependent expression changes of PcG and TxG genes deregulated by the AHR/TCDD axis.

PcG and TxG genes that show altered expression in AHR positive cells treated with TCDD.

## References

- Akasaka, T., N. Takahashi, et al. (2002). "MBLR, a new RING finger protein resembling mammalian Polycomb gene products, is regulated by cell cycle-dependent phosphorylation." *Genes Cells* **7**(8):835-850.
- Alkema, M. J., J. Jacobs, et al. (1997). "MPc2, a new murine homolog of the Drosophila polycomb protein is a member of the mouse polycomb transcriptional repressor complex." *J Mol Biol* **273**(5):993-1003.
- Anders S, Huber W. 2010. Differential expression analysis for sequence count data. *Genome Biol* **11**:R106.
- Barak, O., M. A. Lazzaro, et al. (2003). "Isolation of human NURF:a regulator of Engrailed gene expression." *EMBO J* **22**(22):6089-6100.
- Barrett T, Troup DB, Wilhite SE, Ledoux P, Rudnev D, Evangelista C, et al. 2009. NCBI GEO:archive for high-throughput functional genomic data. *Nucleic Acids Res* **37**:D885-D890.
- Baumann, C. and R. De La Fuente (2011). "Role of Polycomb Group Protein Cbx2/M33 in Meiosis Onset and Maintenance of Chromosome Stability in the Mammalian Germline." *Genes (Basel)* **2**(1):59-80.
- Biel, M., C. Wahl-Schott, et al. (2009). "Hyperpolarization-activated cation channels:from genes to function." *Physiol Rev* **89**(3):847-885.
- Black, B. L. and E. N. Olson (1998). "Transcriptional control of muscle development by myocyte enhancer factor-2 (MEF2) proteins." *Annu Rev Cell Dev Biol* **14**:167-196.
- Cao, R., Y. Tsukada, et al. (2005). "Role of Bmi-1 and Ring1A in H2A ubiquitylation and Hox gene silencing." *Mol Cell* **20**(6):845-854.
- Chaldoupi, S. M., P. Loh, et al. (2009). "The role of connexin40 in atrial fibrillation." *Cardiovasc Res* **84**(1):15-23.
- Durocher, D., F. Charron, et al. (1997). "The cardiac transcription factors Nkx2-5 and GATA-4 are mutual cofactors." *EMBO J* **16**(18):5687-5696.

- El Sharaby, A. A., M. Egerbacher, et al. (2001). "Immunohistochemical demonstration of Leu-7 (HNK-1), Neurone-specific Enolase (NSE) and Protein-Genes Peptide (PGP) 9.5 in the developing camel (*Camelus dromedarius*) heart." *Anat Histol Embryol* **30**(6):321-325.
- Espinoza-Lewis, R. A., L. Yu, et al. (2009). "Shox2 is essential for the differentiation of cardiac pacemaker cells by repressing Nkx2-5." *Dev Biol* **327**(2):376-385.
- Franco, D., W. H. Lamers, et al. (1998). "Patterns of expression in the developing myocardium: towards a morphologically integrated transcriptional model." *Cardiovasc Res* **38**(1):25-53.
- Fuks, F., W. A. Burgers, et al. (2001). "Dnmt3a binds deacetylases and is recruited by a sequence-specific repressor to silence transcription." *EMBO J* **20**(10):2536-2544.
- Garcia-Cao, M., R. O'Sullivan, et al. (2004). "Epigenetic regulation of telomere length in mammalian cells by the Suv39h1 and Suv39h2 histone methyltransferases." *Nat Genet* **36**(1):94-99.
- Gertsenstein M, Nutter LM, Reid T, Pereira M, Stanford WL, Rossant J, et al. 2010. Efficient generation of germ line transmitting chimeras from C57BL/6N ES cells by aggregation with outbred host embryos. *PLoS One* 5:e11260.
- Greulich, F., C. Rudat, et al. (2011). "Mechanisms of T-box gene function in the developing heart." *Cardiovasc Res* **91**(2):212-222.
- Harvey, R. P. (1996). "NK-2 homeobox genes and heart development." *Dev Biol* **178**(2):203-216.
- Harzheim, D., K. H. Pfeiffer, et al. (2008). "Cardiac pacemaker function of HCN4 channels in mice is confined to embryonic development and requires cyclic AMP." *EMBO J* **27**(4):692-703.
- Hemenway, C. S., B. W. Halligan, et al. (2000). "Identification and analysis of a third mouse Polycomb gene, MPc3." *Gene* **242**(1-2):31-40.
- Horsley, D., A. Hutchings, et al. (1996). "M32, a murine homologue of Drosophila heterochromatin protein 1 (HP1), localises to euchromatin within interphase nuclei and is largely excluded from constitutive heterochromatin." *Cytogenet Cell Genet* **73**(4):308-311.
- Houweling, A. C., M. M. van Borren, et al. (2005). "Expression and regulation of the atrial natriuretic factor encoding gene Nppa during development and disease." *Cardiovasc Res* **67**(4):583-593.

- Ihaka P, Gentleman R. 1996. R: A language for data analysis and graphics. In: 299-314.
- Ismail, I. H., J. P. Gagne, et al. (2012). "CBX4-mediated SUMO modification regulates BMI1 recruitment at sites of DNA damage." *Nucleic Acids Res* **40**(12):5497-5510.
- Isono, K., Y. Fujimura, et al. (2005). "Mammalian polyhomeotic homologues Phc2 and Phc1 act in synergy to mediate polycomb repression of Hox genes." *Mol Cell Biol* **25**(15):6694-6706.
- Jeong, K. S., J. H. Park, et al. (2005). "The analysis of X-chromosome inactivation-related gene expression from single mouse embryo with sex-determination." *Biochem Biophys Res Commun* **333**(3):803-807.
- Kuruppu, S. and A. I. Smith (2012). "Endothelin Converting Enzyme-1 phosphorylation and trafficking." *FEBS Lett* **586**(16):2212-2217.
- Laget, S., M. Joulie, et al. (2010). "The human proteins MBD5 and MBD6 associate with heterochromatin but they do not bind methylated DNA." *PLoS One* **5**(8):e11982.
- Lazzaro, M. A. and D. J. Picketts (2001). "Cloning and characterization of the murine Imitation Switch (ISWI) genes: differential expression patterns suggest distinct developmental roles for Snf2h and Snf2l." *J Neurochem* **77**(4):1145-1156.
- Lessard, J., J. I. Wu, et al. (2007). "An essential switch in subunit composition of a chromatin remodeling complex during neural development." *Neuron* **55**(2):201-215.
- Lien, C. L., C. Wu, et al. (1999). "Control of early cardiac-specific transcription of Nkx2-5 by a GATA-dependent enhancer." *Development* **126**(1):75-84.
- Minakuchi, M., N. Kakazu, et al. (2001). "Identification and characterization of SEB, a novel protein that binds to the acute undifferentiated leukemia-associated protein SET." *Eur J Biochem* **268**(5):1340-1351.
- Morgan M, Anders S, Lawrence M, Aboyoun P, Pages H, Gentleman R. 2009. ShortRead: a bioconductor package for input, quality assessment and exploration of high-throughput sequence data. *Bioinformatics* **25**:2607-2608.
- Narayan, N., I. H. Lee, et al. (2012). "The NAD-dependent deacetylase SIRT2 is required for programmed necrosis." *Nature* **492**(7428):199-204.
- O'Carroll, D., H. Scherthan, et al. (2000). "Isolation and characterization of Suv39h2, a second histone H3 methyltransferase gene that displays testis-specific expression." *Mol Cell Biol* **20**(24):9423-9433.

- Okano, M., D. W. Bell, et al. (1999). "DNA methyltransferases Dnmt3a and Dnmt3b are essential for de novo methylation and mammalian development." *Cell* **99**(3):247-257.
- Otsuki, T., K. Yata, et al. (2004). "Expression of protein gene product 9.5 (PGP9.5)/ubiquitin-C-terminal hydrolase 1 (UCHL-1) in human myeloma cells." *Br J Haematol* **127**(3):292-298.
- Patient, R. K. and J. D. McGhee (2002). "The GATA family (vertebrates and invertebrates)." *Curr Opin Genet Dev* **12**(4):416-422.
- Pereira, A. H., C. F. Clemente, et al. (2009). "MEF2C silencing attenuates load-induced left ventricular hypertrophy by modulating mTOR/S6K pathway in mice." *PLoS One* **4**(12):e8472.
- Peters, A. H., D. O'Carroll, et al. (2001). "Loss of the Suv39h histone methyltransferases impairs mammalian heterochromatin and genome stability." *Cell* **107**(3):323-337.
- Sartor MA, Leikauf GD, Medvedovic M. 2009. LRpath:a logistic regression approach for identifying enriched biological groups in gene expression data. *Bioinformatics* 25:211-217.
- Schoorlemmer, J., C. Marcos-Gutierrez, et al. (1997). "Ring1A is a transcriptional repressor that interacts with the Polycomb-M33 protein and is expressed at rhombomere boundaries in the mouse hindbrain." *EMBO J* **16**(19):5930-5942.
- Sebastian, S., P. Sreenivas, et al. (2009). "MLL5, a trithorax homolog, indirectly regulates H3K4 methylation, represses cyclin A2 expression, and promotes myogenic differentiation." *Proc Natl Acad Sci U S A* **106**(12):4719-4724.
- Shinde K, Phatak M, Johannes FM, Chen J, Li Q, Vineet JK, et al. 2010. Genomics Portals:integrative web-platform for mining genomics data. *BMC Genomics* 11:27.
- Shur, I., R. Socher, et al. (2006). "In vivo association of CReMM/CHD9 with promoters in osteogenic cells." *J Cell Physiol* **207**(2):374-378.
- Singh, P. B., J. R. Miller, et al. (1991). "A sequence motif found in a Drosophila heterochromatin protein is conserved in animals and plants." *Nucleic Acids Res* **19**(4):789-794.
- Sohl, G. and K. Willecke (2004). "Gap junctions and the connexin protein family." *Cardiovasc Res* **62**(2):228-232.
- Stieber, J., S. Herrmann, et al. (2003). "The hyperpolarization-activated channel HCN4 is required for the generation of pacemaker action potentials in the embryonic heart." *Proc Natl Acad Sci U S A* **100**(25):15235-15240.



- Surapureddi, S., N. Viswakarma, et al. (2006). "PRIC320, a transcription coactivator, isolated from peroxisome proliferator-binding protein complex." *Biochem Biophys Res Commun* **343**(2):535-543.
- Takahara, Y., D. Tomotsune, et al. (1997). "Targeted disruption of the mouse homologue of the *Drosophila* polyhomeotic gene leads to altered anteroposterior patterning and neural crest defects." *Development* **124**(19):3673-3682.
- Tong, J. K., C. A. Hassig, et al. (1998). "Chromatin deacetylation by an ATP-dependent nucleosome remodelling complex." *Nature* **395**(6705):917-921.
- Trapnell C, Pachter L, Salzberg SL. 2009. TopHat:discovering splice junctions with RNA-Seq. *Bioinformatics* 25:1105-1111.
- Van Houdt, J. K., B. A. Nowakowska, et al. (2012). "Heterozygous missense mutations in *SMARCA2* cause Nicolaides-Baraitser syndrome." *Nat Genet* **44**(4):445-449, S441.
- Wang, Y., Y. Zheng, et al. (2007). "Polymorphisms of *KDR* gene are associated with coronary heart disease." *J Am Coll Cardiol* **50**(8):760-767.
- Watanabe, D., I. Suetake, et al. (2002). "Stage- and cell-specific expression of *Dnmt3a* and *Dnmt3b* during embryogenesis." *Mech Dev* **118**(1-2):187-190.
- Weber H, Birnbaum LS. 1985. 2,3,7,8-Tetrachlorodibenzo-p-dioxin (TCDD) and 2,3,7,8-tetrachlorodibenzofuran (TCDF) in pregnant C57BL/6N mice:distribution to the embryo and excretion. *Arch Toxicol* 57:159-162.
- Weiss, A. and L. A. Leinwand (1996). "The mammalian myosin heavy chain gene family." *Annu Rev Cell Dev Biol* **12**:417-439.
- Xiao, Q., G. Wang, et al. (2011). "Chromobox protein homolog 3 is essential for stem cell differentiation to smooth muscles in vitro and in embryonic arteriogenesis." *Arterioscler Thromb Vasc Biol* **31**(8):1842-1852.
- Yamaki, M., K. Isono, et al. (2002). "The mouse *Edr2* (*Mph2*) gene has two forms of mRNA encoding 90- and 36-kDa polypeptides." *Gene* **288**(1-2):103-110.
